# Supplementary material for: Efficient Synthesis of 1H-Benzo[4,5]imidazo[1,2-c][1,3]oxazin-1-one Derivatives Using Ag2CO3/TFA-Catalyzed 6-endo-dig Cyclization: Reaction Scope and Mechanistic Study
Source: MDPI journal article supplement (doi:10.3390/molecules28052403), 2023-03-06
Supplement: s1 [file s1]

## Supporting information for

# Efficient Synthesis of 1*H*-Benzo[4,5]imidazo[1,2-*c*][1,3]oxazin-1-one Derivatives Using Ag<sub>2</sub>CO<sub>3</sub>/TFA-Catalyzed 6-*endo-dig* Cyclization: Reaction Scope and Mechanistic study.

Abdelkarim El Qami <sup>1,2</sup>, Badr Jismy <sup>1,\*</sup>, Mohamed Akssira <sup>2</sup>, Johan Jacquemin <sup>3</sup>, Abdellatif Tikad <sup>4,\*</sup> and Mohamed Abarbri <sup>2,\*</sup>

1 Laboratoire de Physico-Chimie des Matériaux et des Electrolytes pour l'Energie (PCM2E), EA 6299, Faculté des Sciences et Techniques, Université de Tours. Avenue Monge Faculté des Sciences, Parc de Grandmont, 37200 Tours, France; abdelkarimelqami@gmail.com

2 Laboratoire de Chimie Physique et Biotechnologies des Biomolécules et des Matériaux (LCP2BM), FSTM, Université Hassan II de Casablanca, BP 146, Mohammedia 28800, Morocco; akssira.m@gmail.com

3 Materials Science and Nano-Engineering (MSN) Department, Mohammed VI Polytechnic University (UM6P), Lot 660–Hay Moulay Rachid, Benguerir 43150, Morocco; johan.jacquemin@um6p.ma

4 Laboratoire de Chimie Moléculaire et Substances Naturelles. Université Moulay Ismail, Faculté des Sciences. B.P. 11201, Zitoune, Meknès 50050, Morocco

\* Correspondence: badr.jismy@hotmail.com (B.J.); a.tikad@umi.ac.ma or abdel.tikad@gmail.com(A.T.); mohamed.abarbri@univ-tours.fr (M.A.)

## Table of Contents

|                                                                              |         |
|------------------------------------------------------------------------------|---------|
| 1. Copies of <sup>1</sup> H, <sup>13</sup> C and <sup>19</sup> F NMR spectra | S2-S33  |
| 2. Details of DFT calculations                                               | S34-S58 |
| 3. References                                                                | S59     |

<sup>1</sup>H NMR (300 MHz, CDCl<sub>3</sub>) of **4a**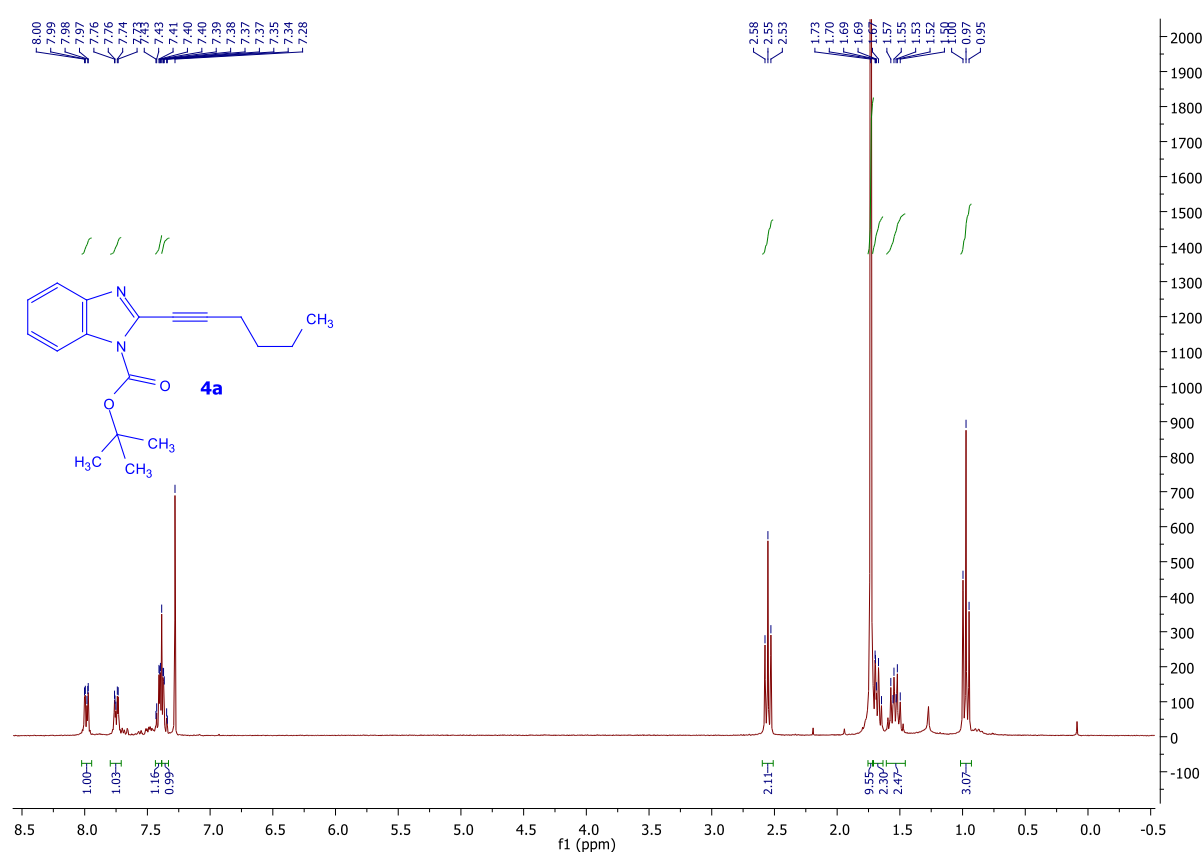 $^{13}\text{C}$  NMR (75 MHz,  $\text{CDCl}_3$ ) of **4a**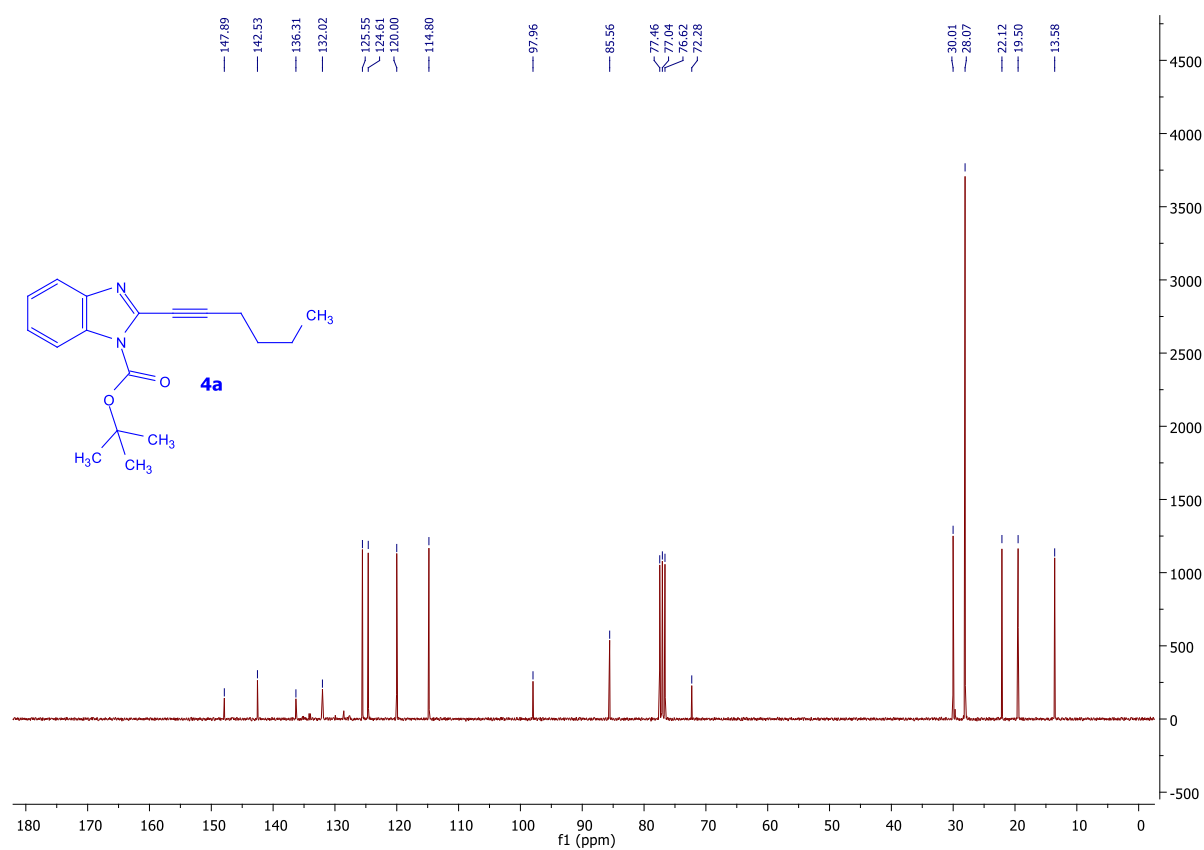

$^1\text{H}$  NMR (300 MHz,  $\text{CDCl}_3$ ) of **4b**

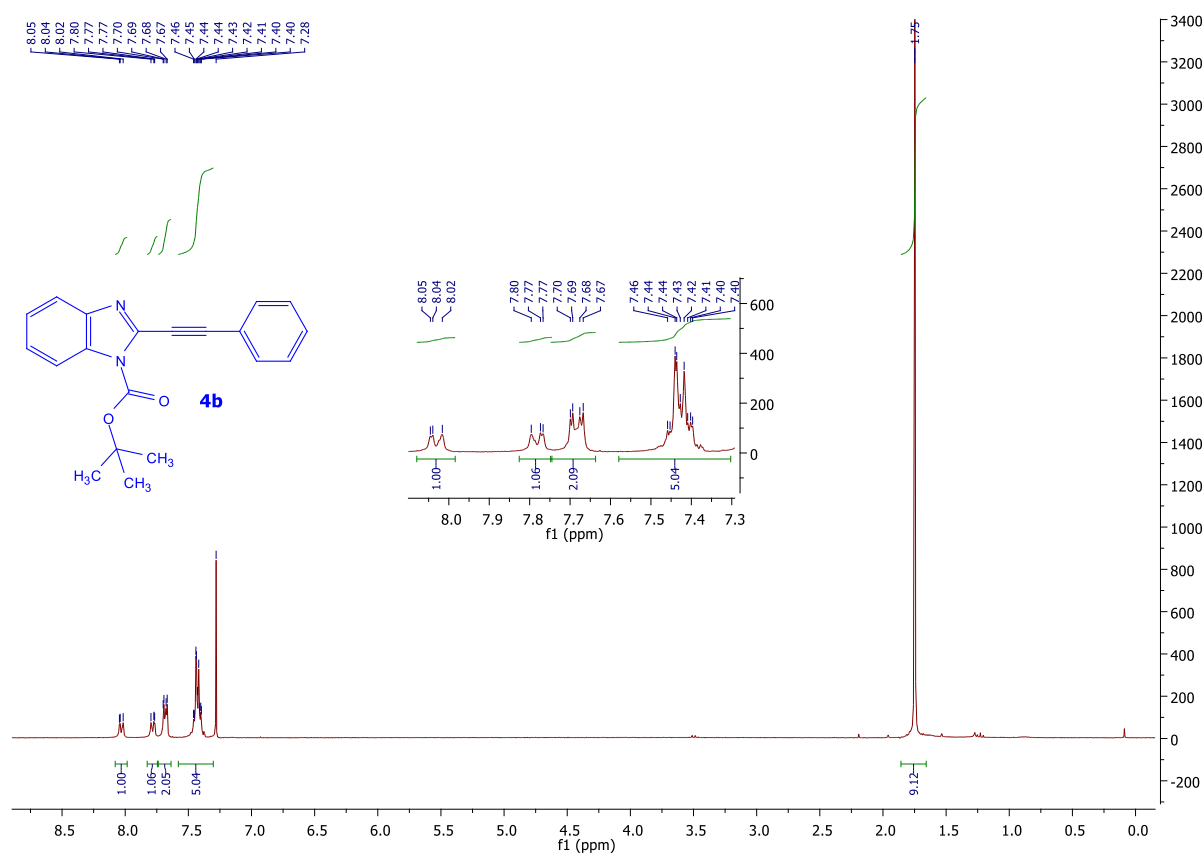

$^{13}\text{C}$  NMR (75 MHz,  $\text{CDCl}_3$ ) of **4b**

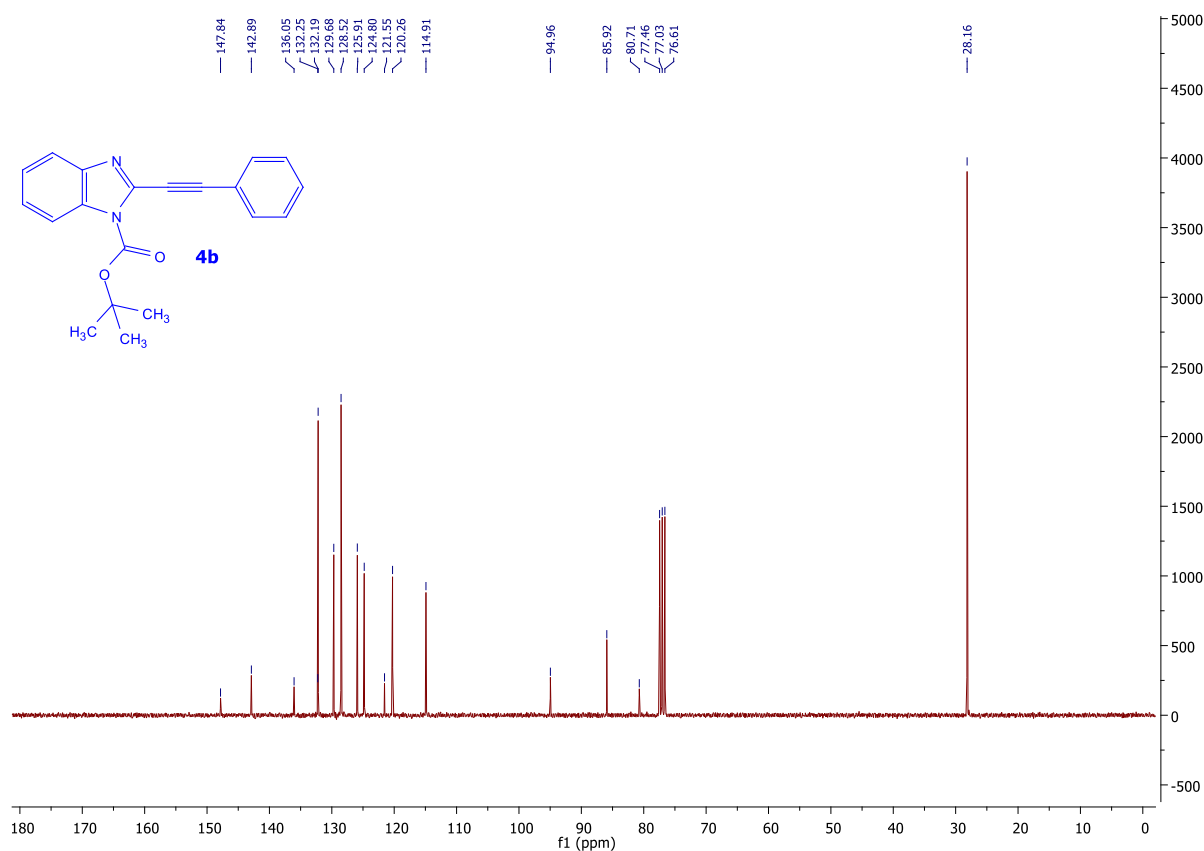

$^1\text{H}$  NMR (300 MHz,  $\text{CDCl}_3$ ) of **4c**

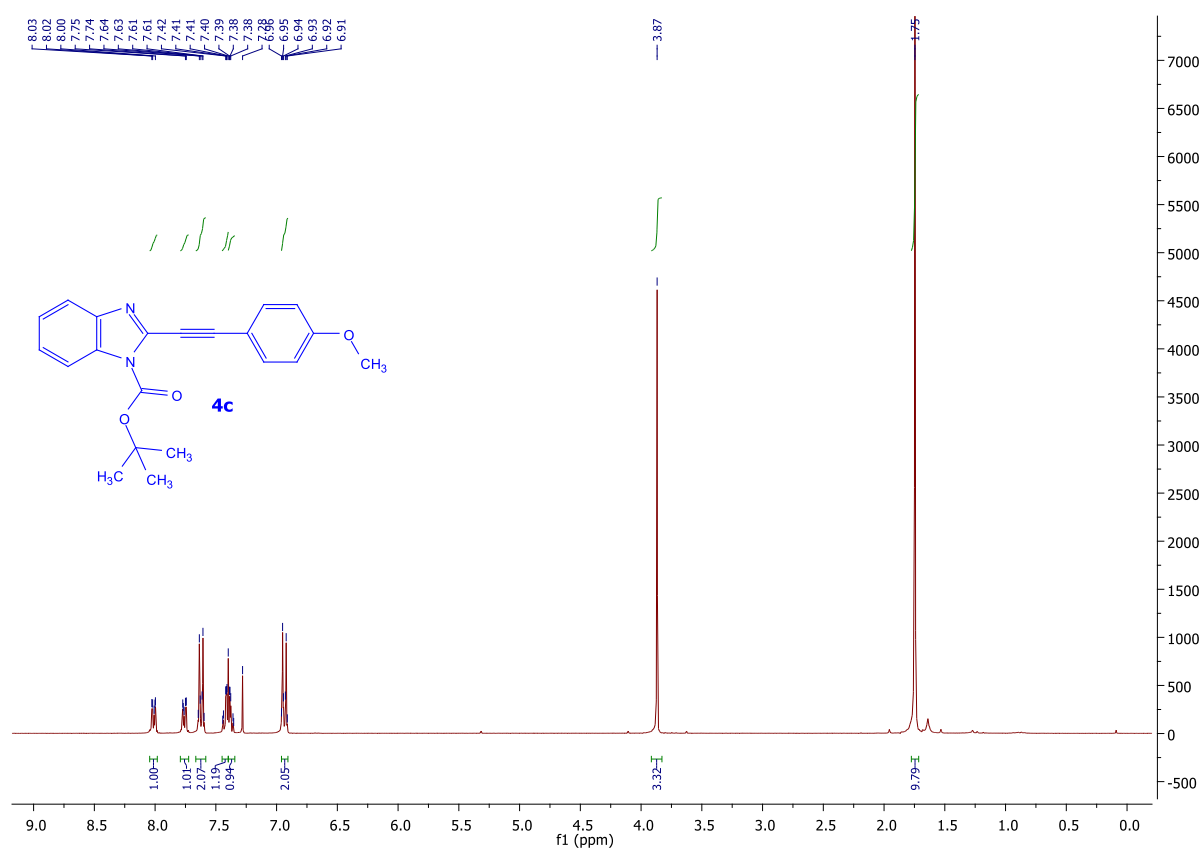

$^{13}\text{C}$  NMR (75 MHz,  $\text{CDCl}_3$ ) of **4c**

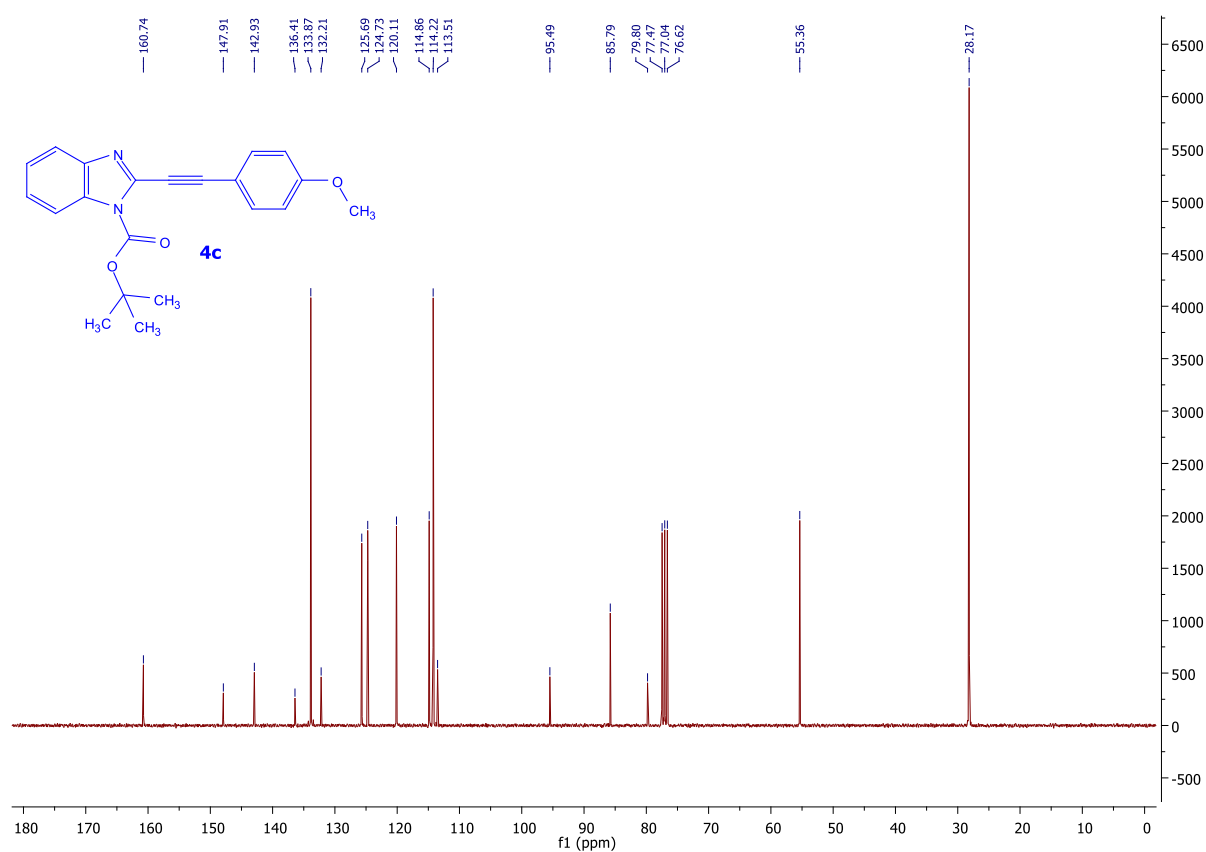

$^1\text{H}$  NMR (300 MHz,  $\text{CDCl}_3$ ) of **4d**

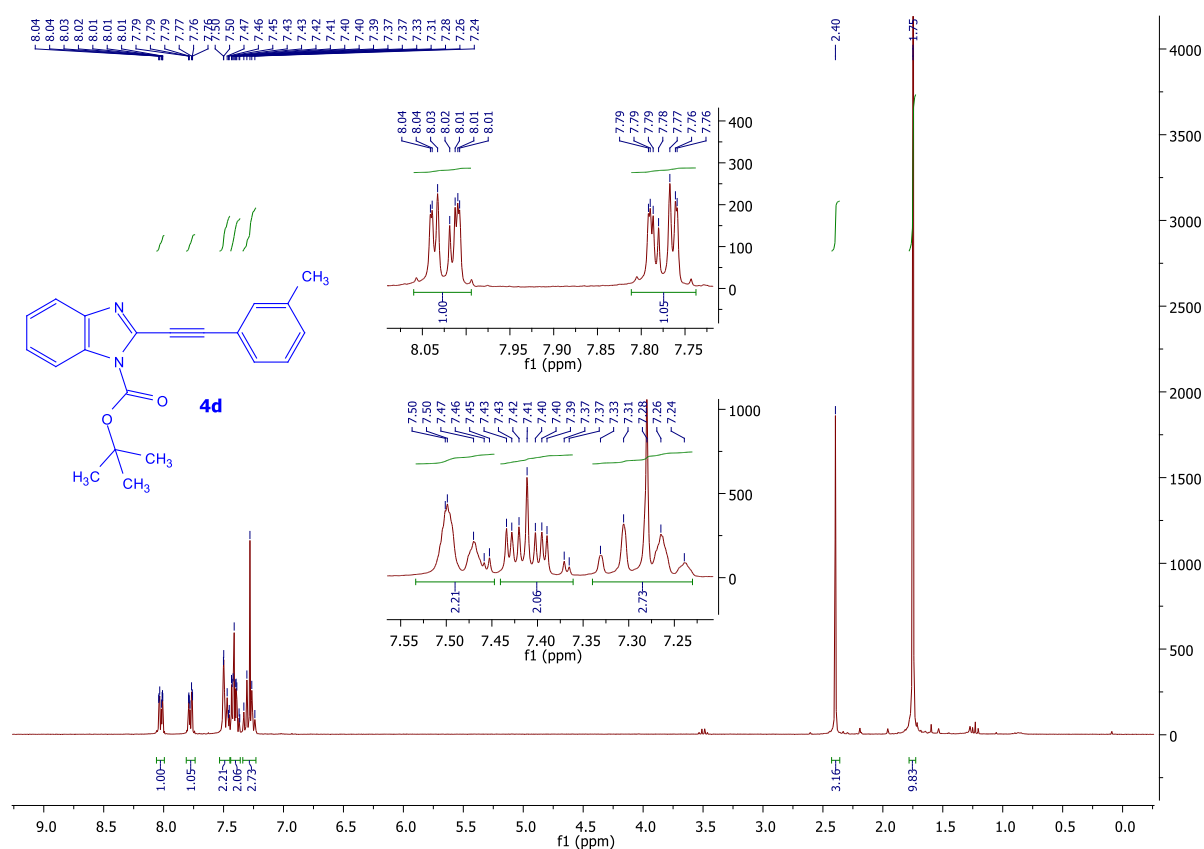

$^{13}\text{C}$  NMR (75 MHz,  $\text{CDCl}_3$ ) of **4d**

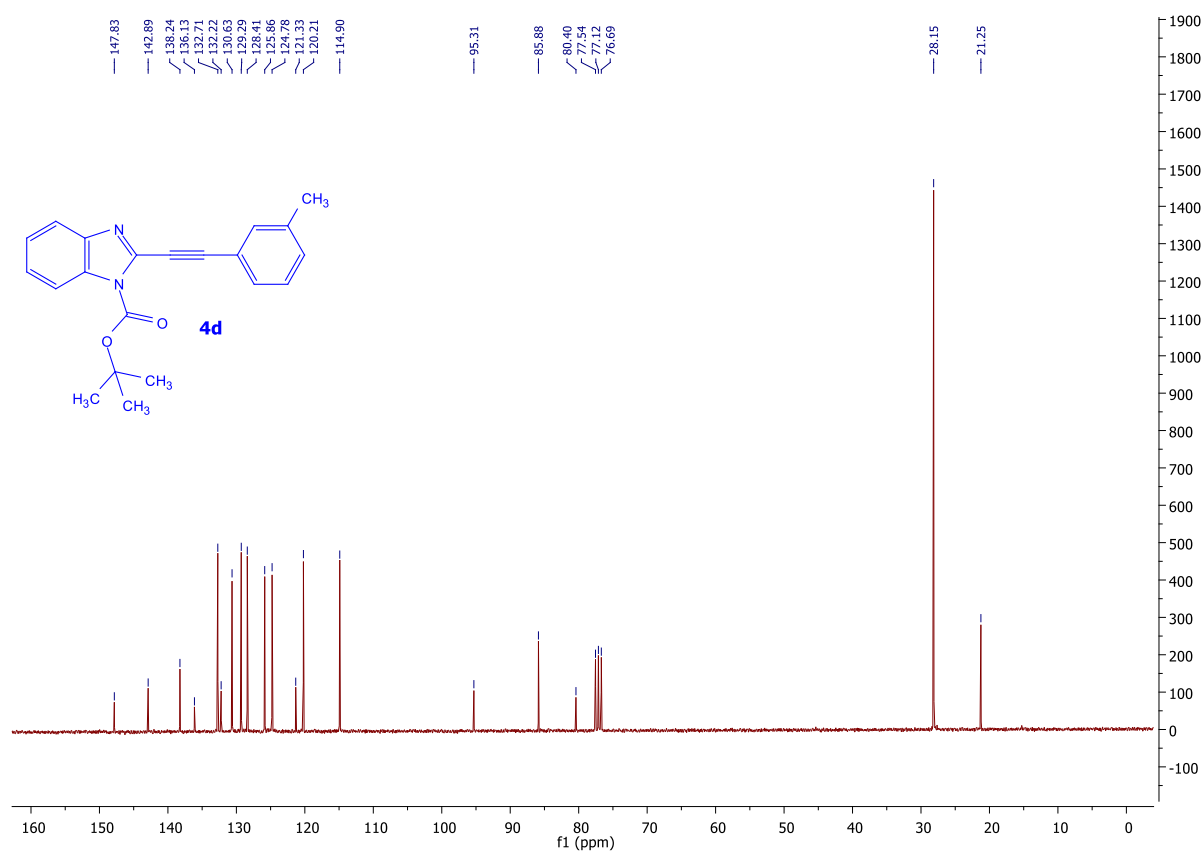

$^1\text{H}$  NMR (300 MHz,  $\text{CDCl}_3$ ) of **4e**

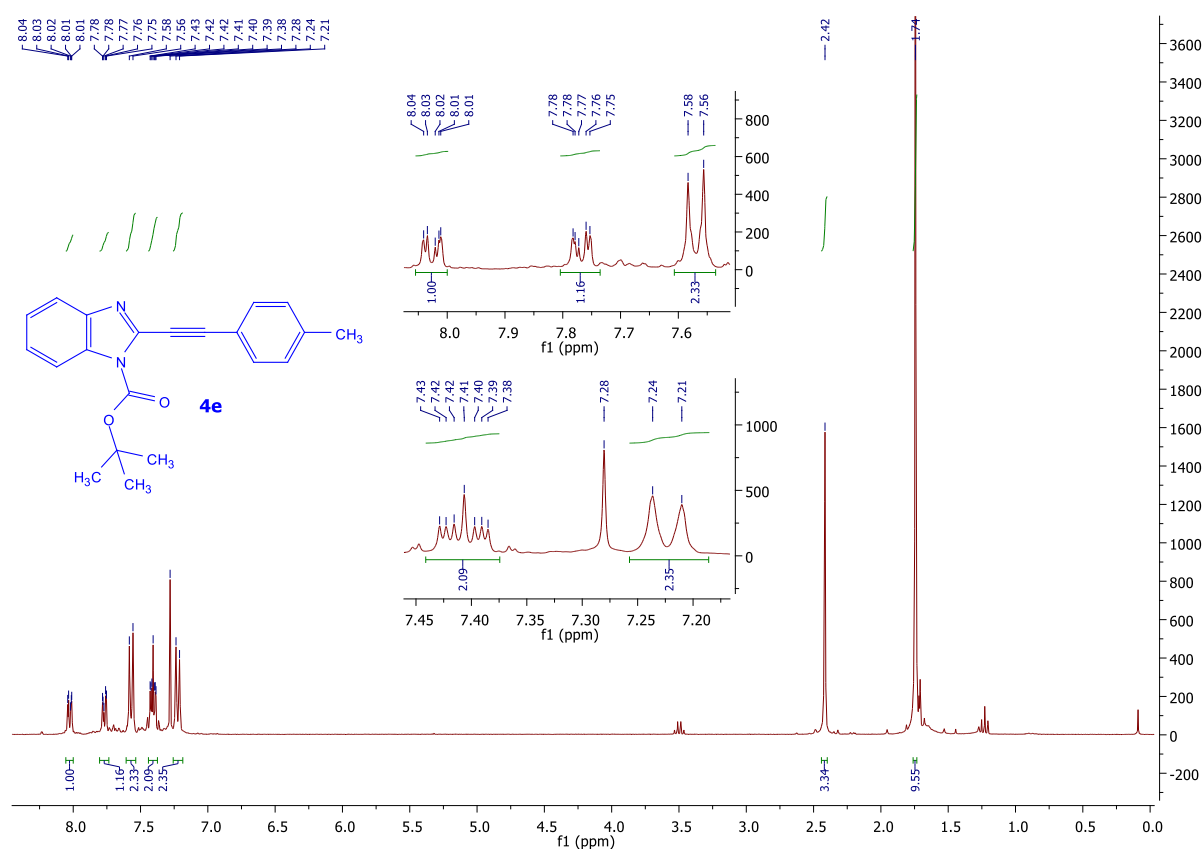

$^{13}\text{C}$  NMR (75 MHz,  $\text{CDCl}_3$ ) of **4e**

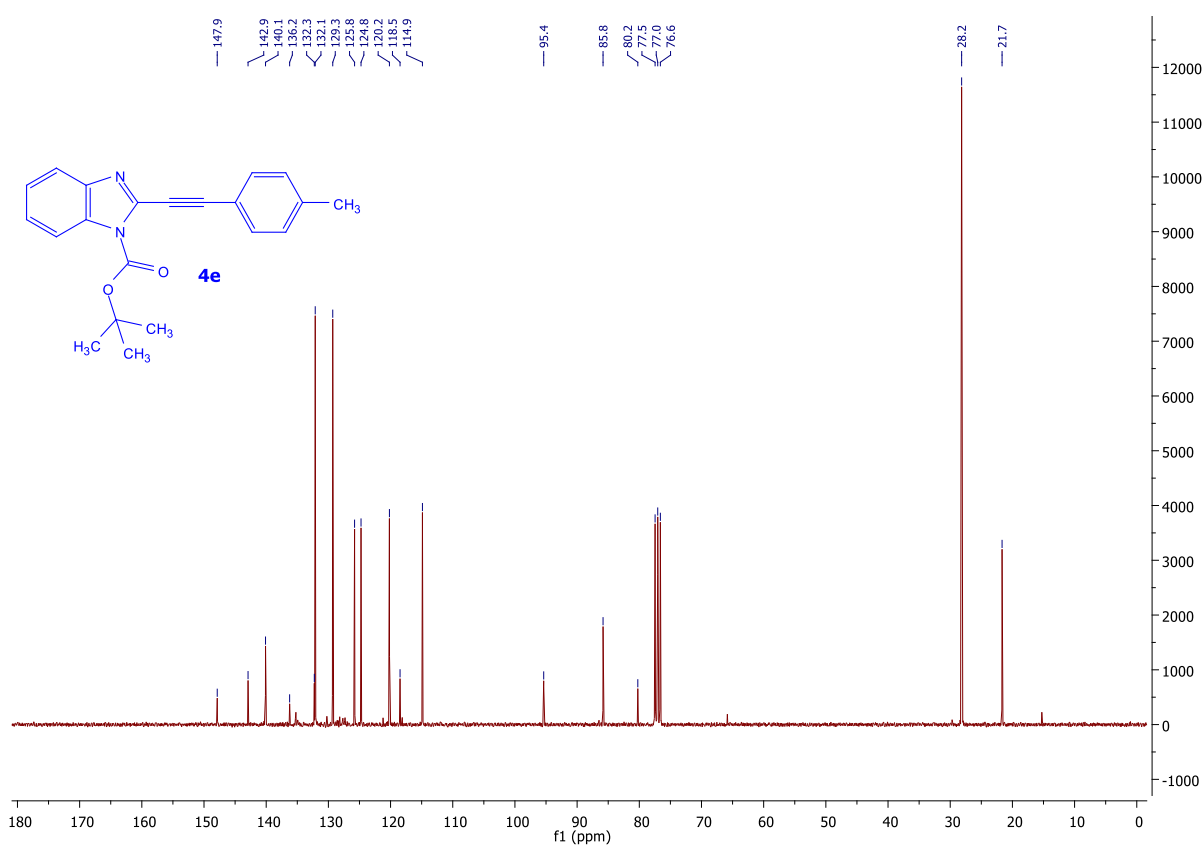

$^1\text{H}$  NMR (300 MHz,  $\text{CDCl}_3$ ) of **4f**

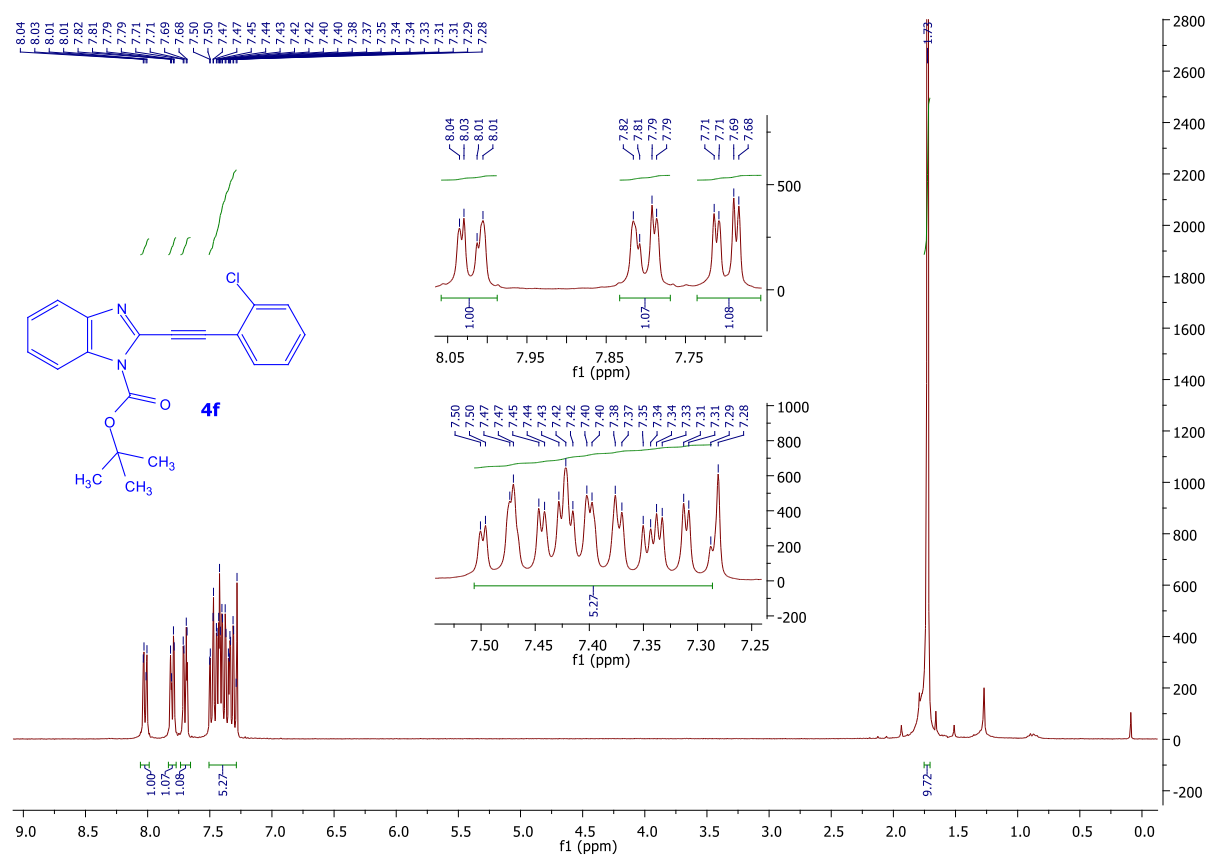

$^{13}\text{C}$  NMR (75 MHz,  $\text{CDCl}_3$ ) of **4f**

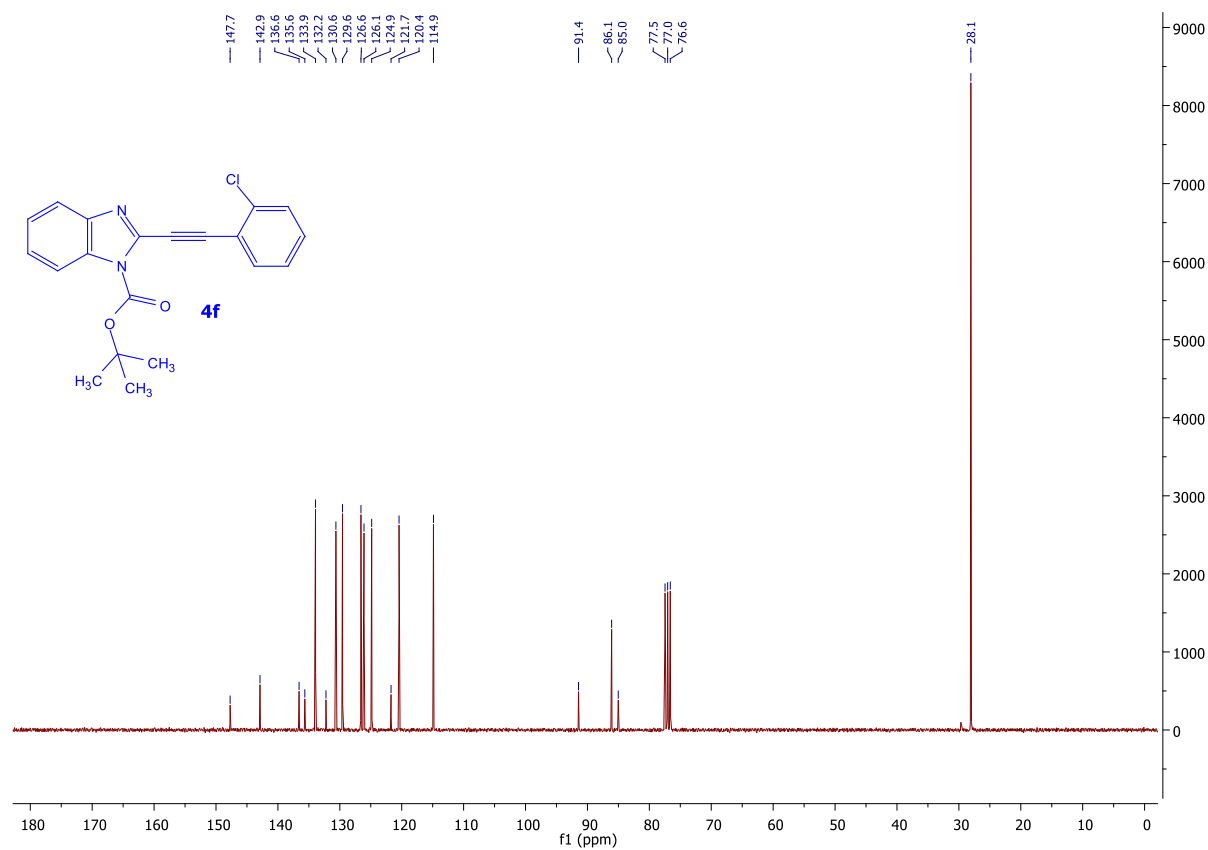

$^1\text{H}$  NMR (300 MHz,  $\text{CDCl}_3$ ) of **4g**

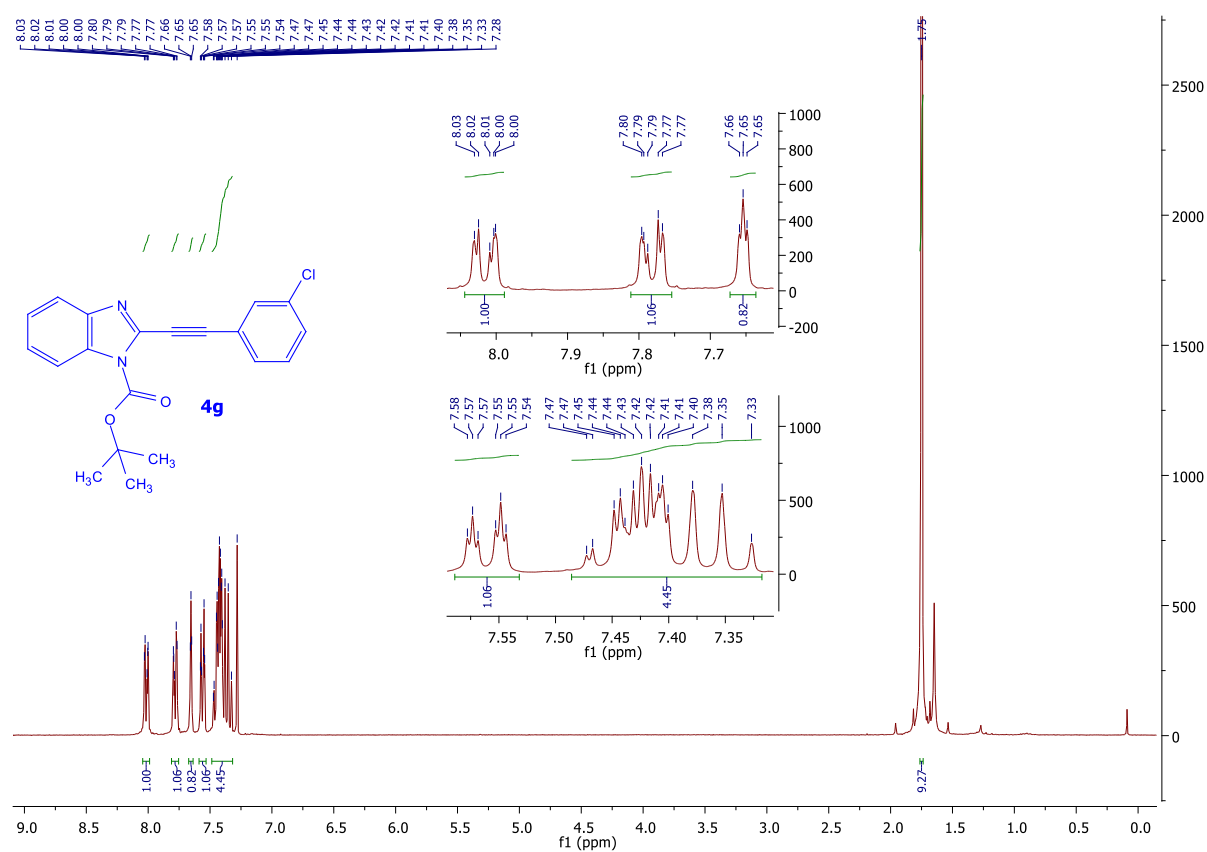

$^{13}\text{C}$  NMR (75 MHz,  $\text{CDCl}_3$ ) of **4g**

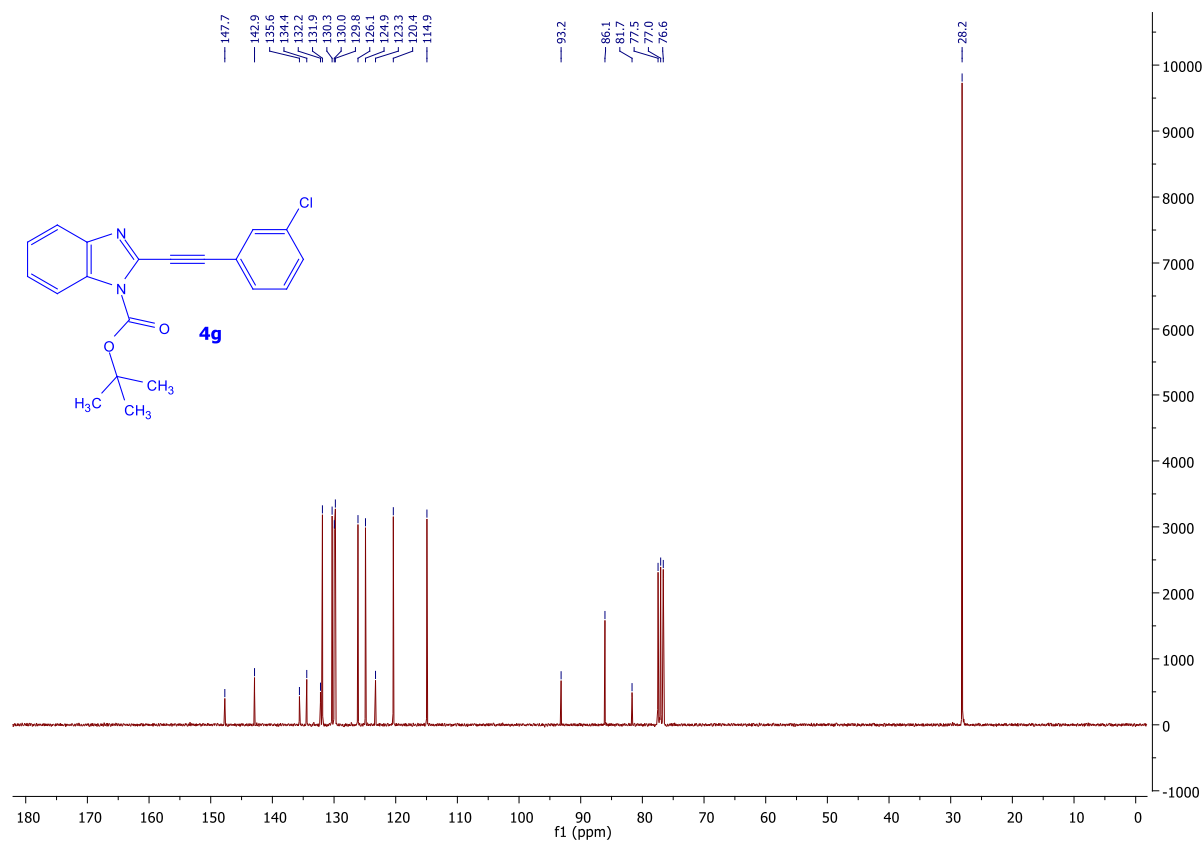



$^1\text{H}$  NMR (300 MHz,  $\text{CDCl}_3$ ) of **4h**

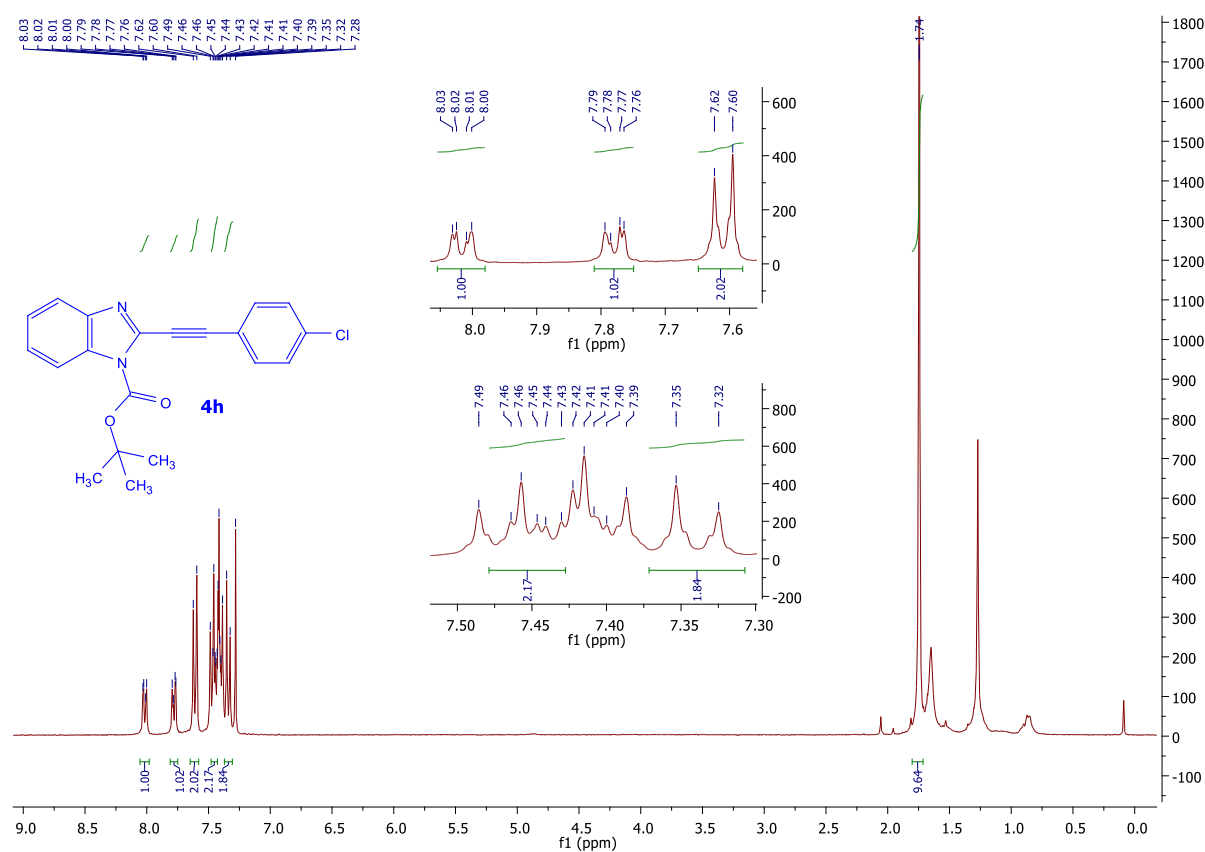

$^{13}\text{C}$  NMR (75 MHz,  $\text{CDCl}_3$ ) of **4h**

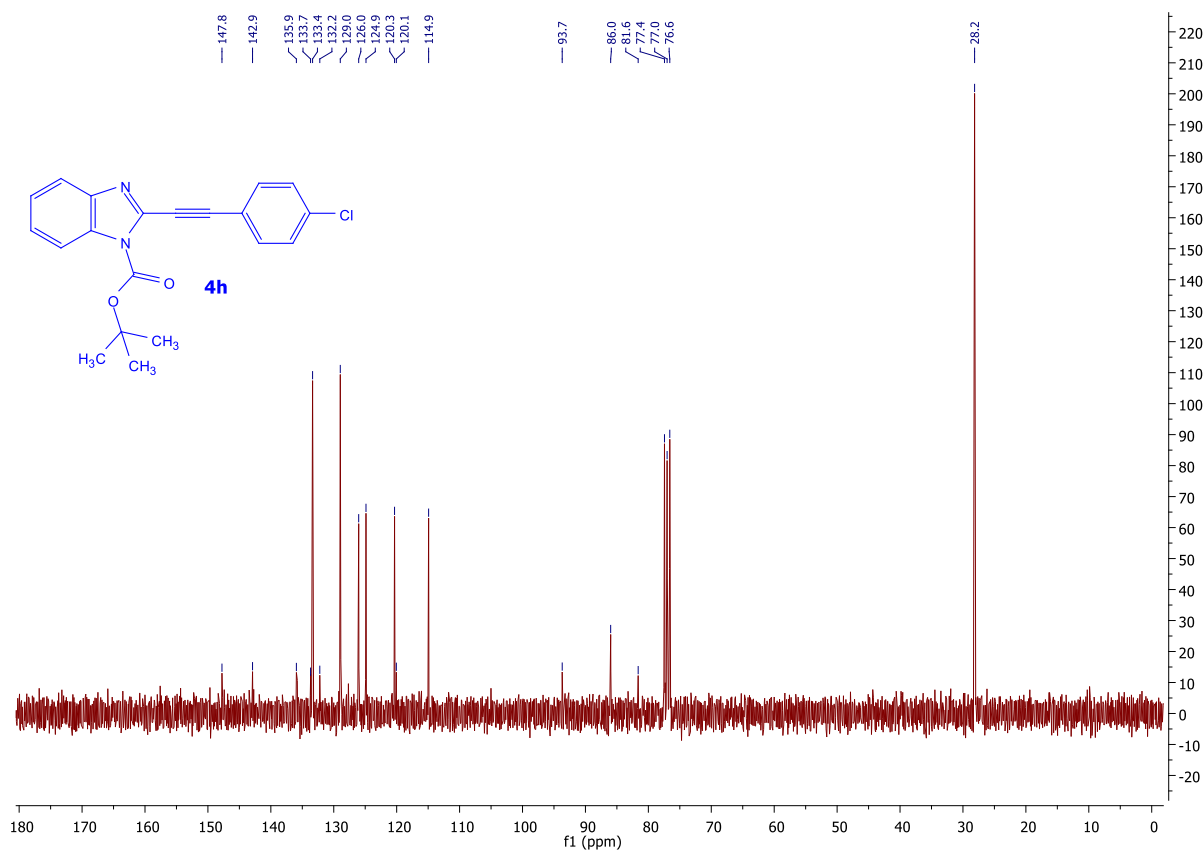

<sup>1</sup>H NMR (300 MHz, CDCl<sub>3</sub>) of **4i**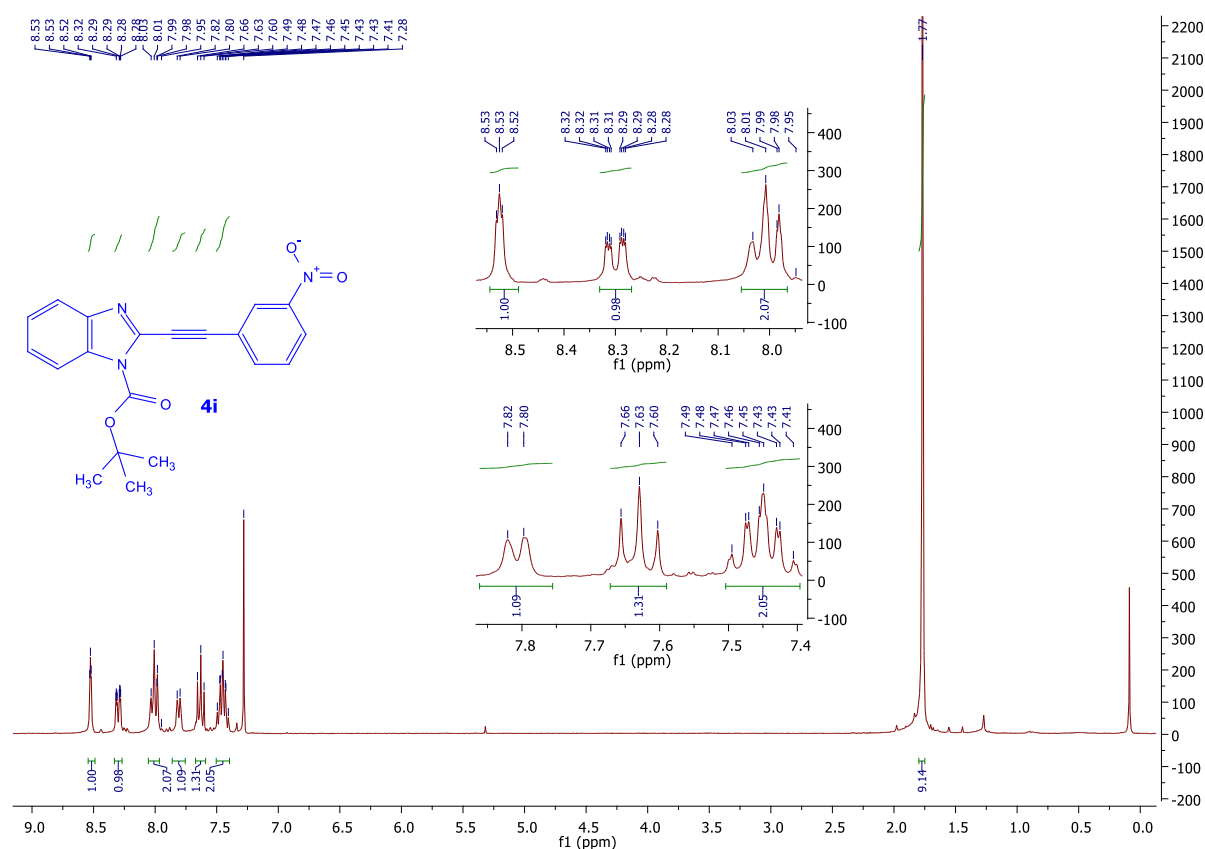 $^{13}\text{C}$  NMR (75 MHz,  $\text{CDCl}_3$ ) of **4i**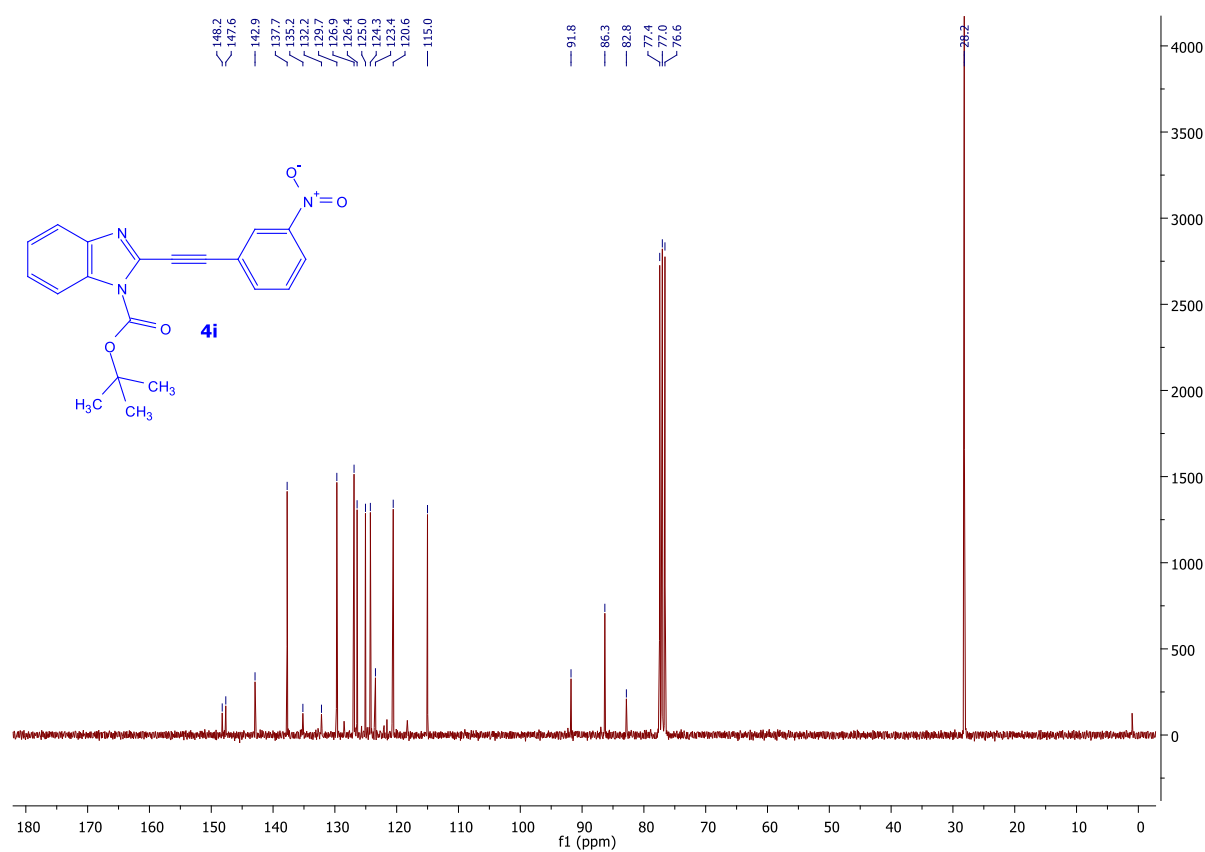

$^1\text{H}$  NMR (300 MHz,  $\text{CDCl}_3$ ) of **4j**

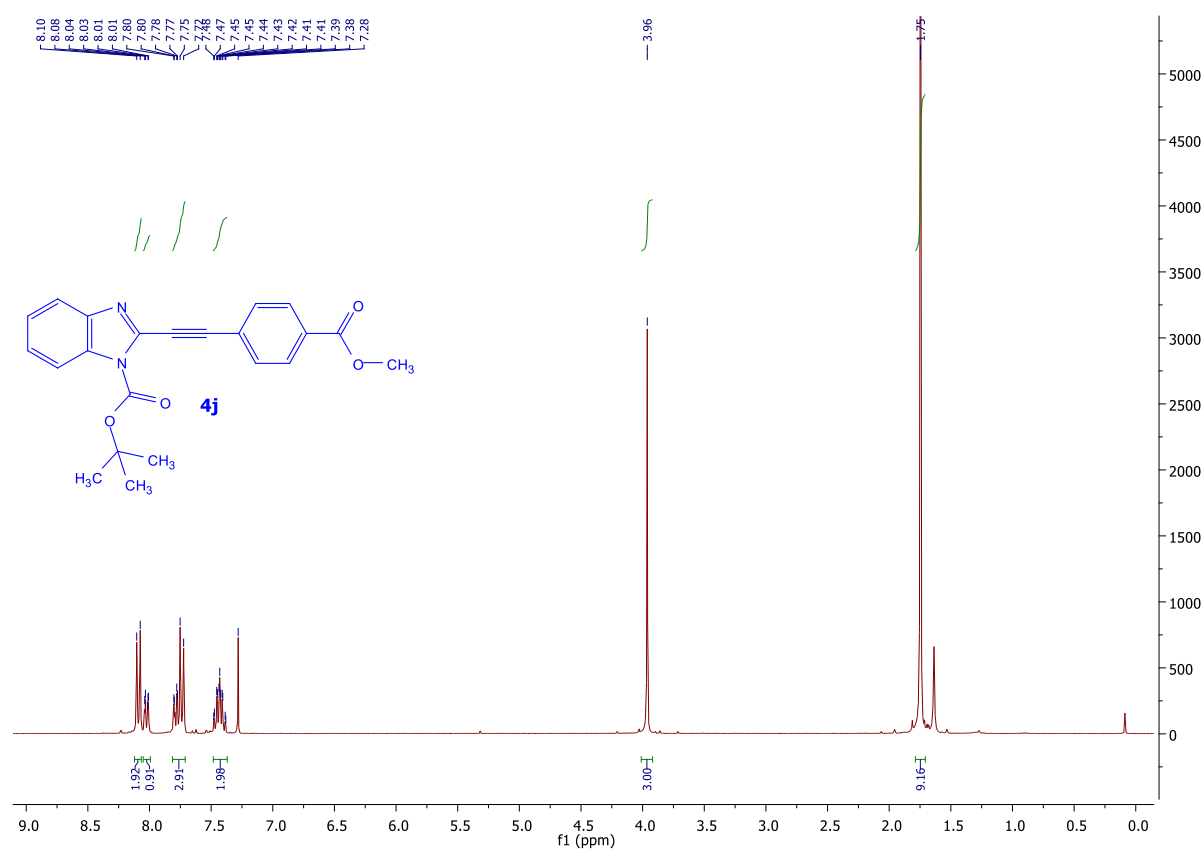

$^{13}\text{C}$  NMR (75 MHz,  $\text{CDCl}_3$ ) of **4j**

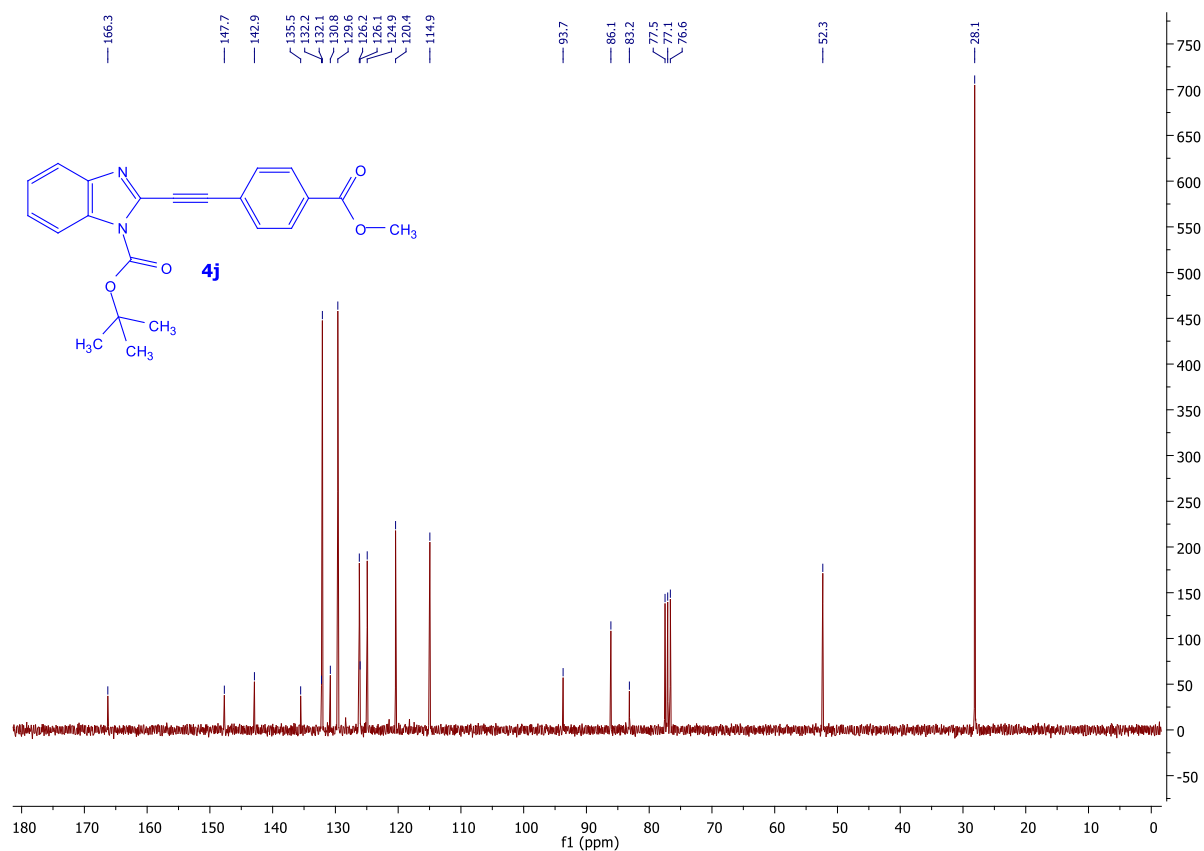

$^1\text{H}$  NMR (300 MHz,  $\text{CDCl}_3$ ) of **4k**

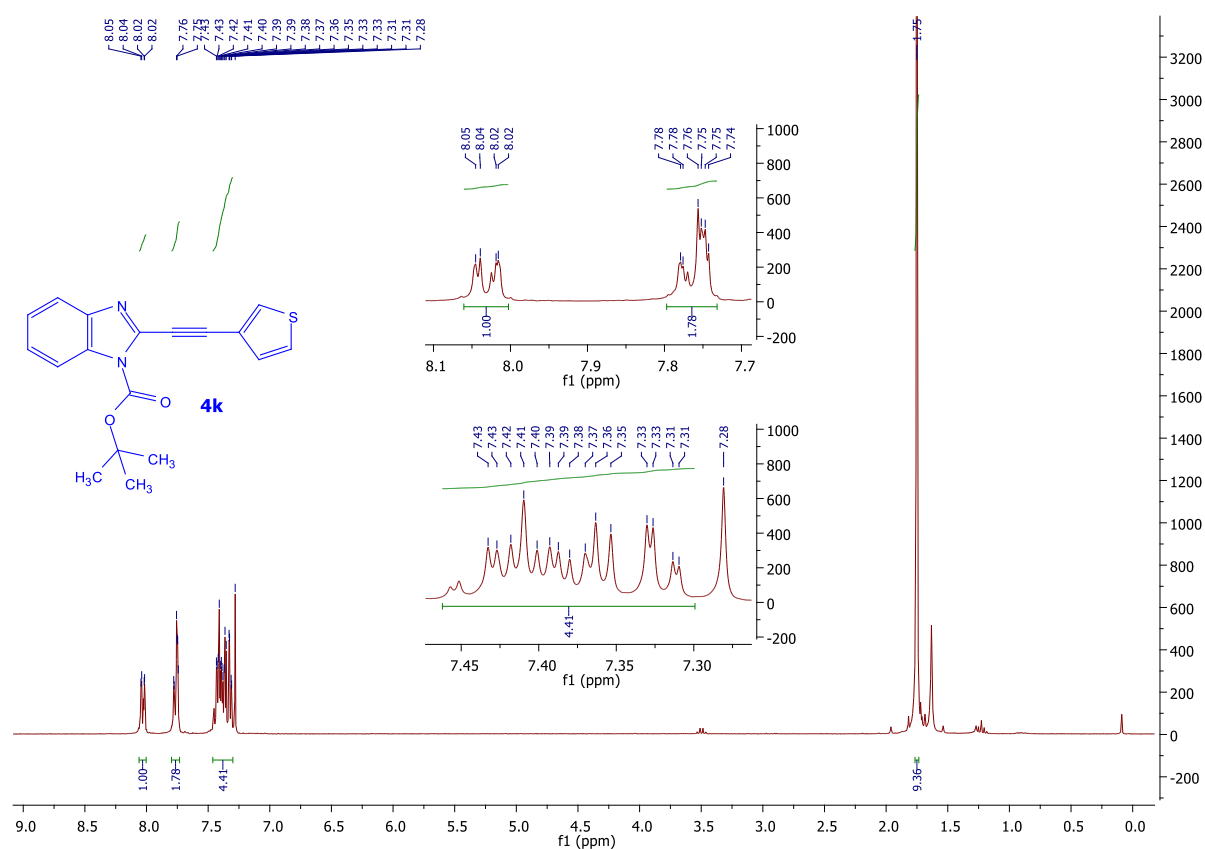

$^{13}\text{C}$  NMR (75 MHz,  $\text{CDCl}_3$ ) of **4k**

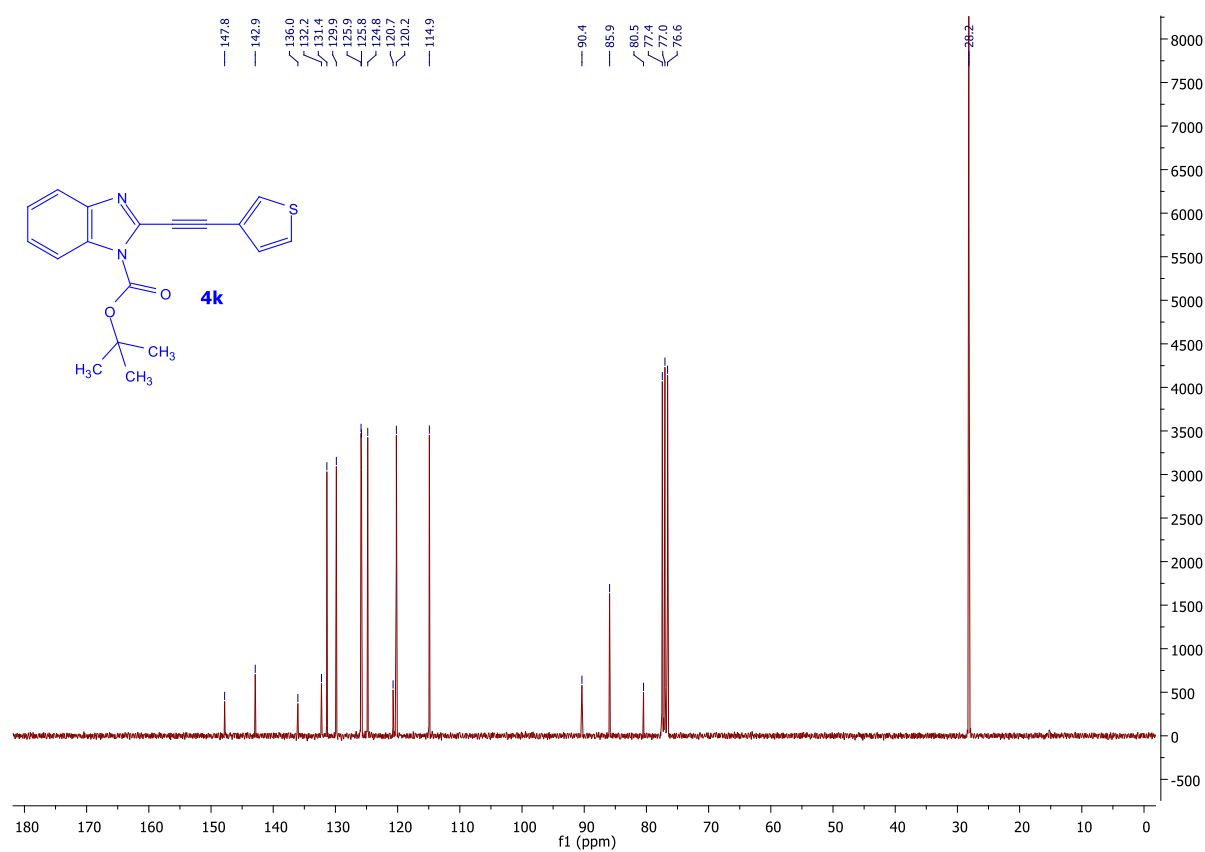

$^1\text{H}$  NMR (300 MHz,  $\text{CDCl}_3$ ) of **4I**

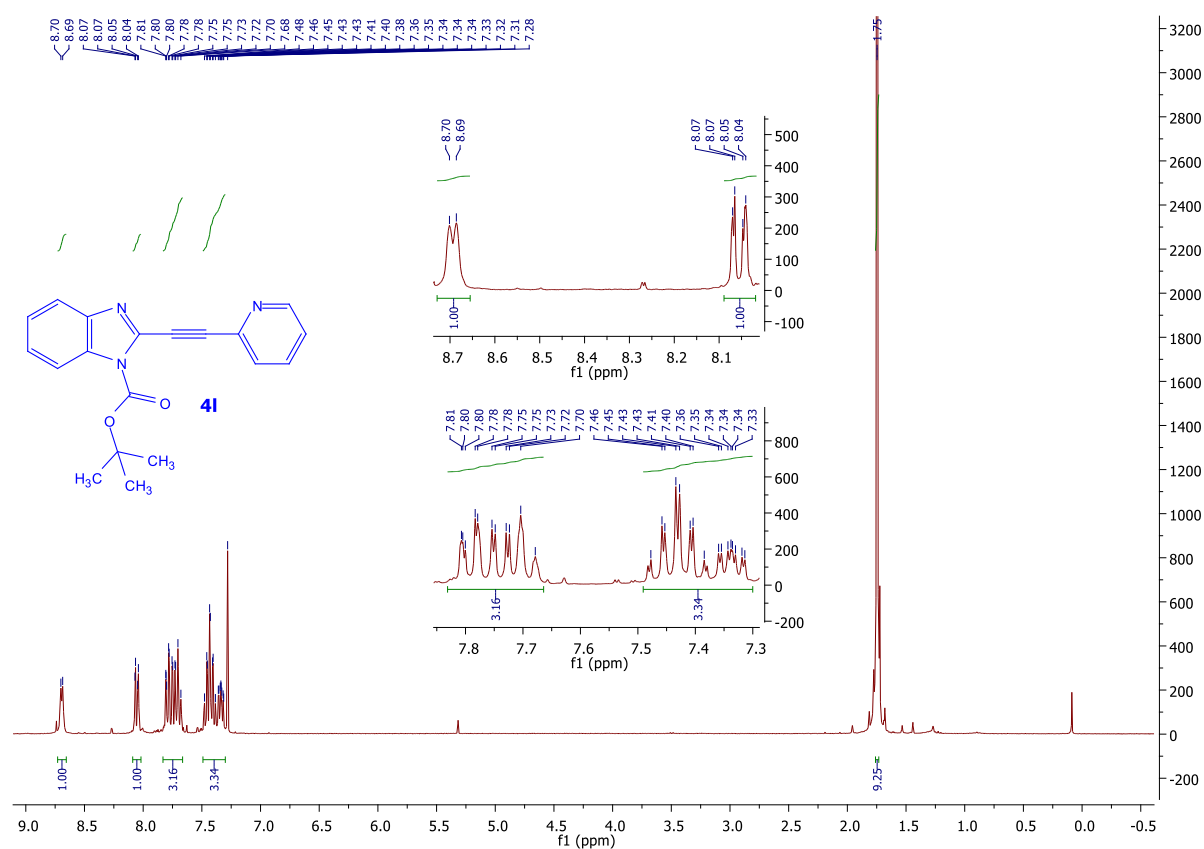

$^{13}\text{C}$  NMR (75 MHz,  $\text{CDCl}_3$ ) of **4I**

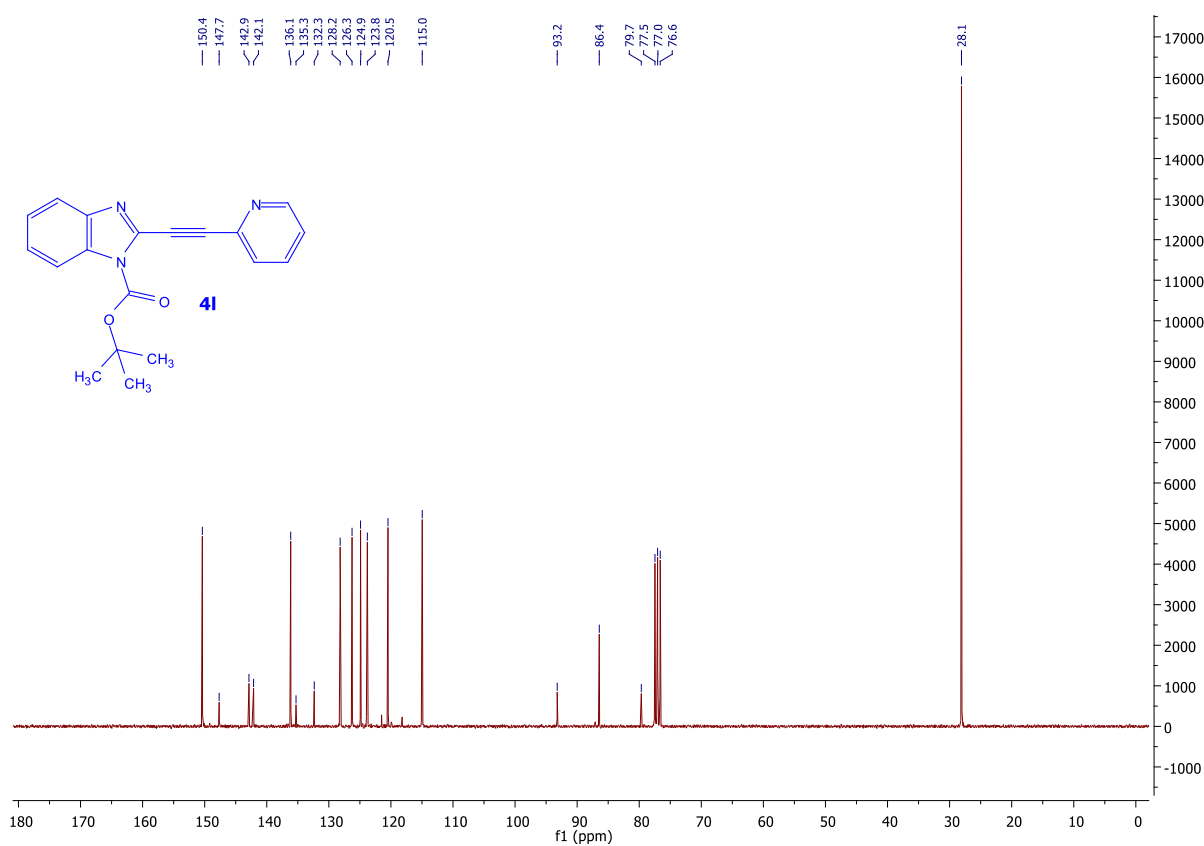

$^1\text{H}$  NMR (300 MHz,  $\text{CDCl}_3$ ) of **4m**

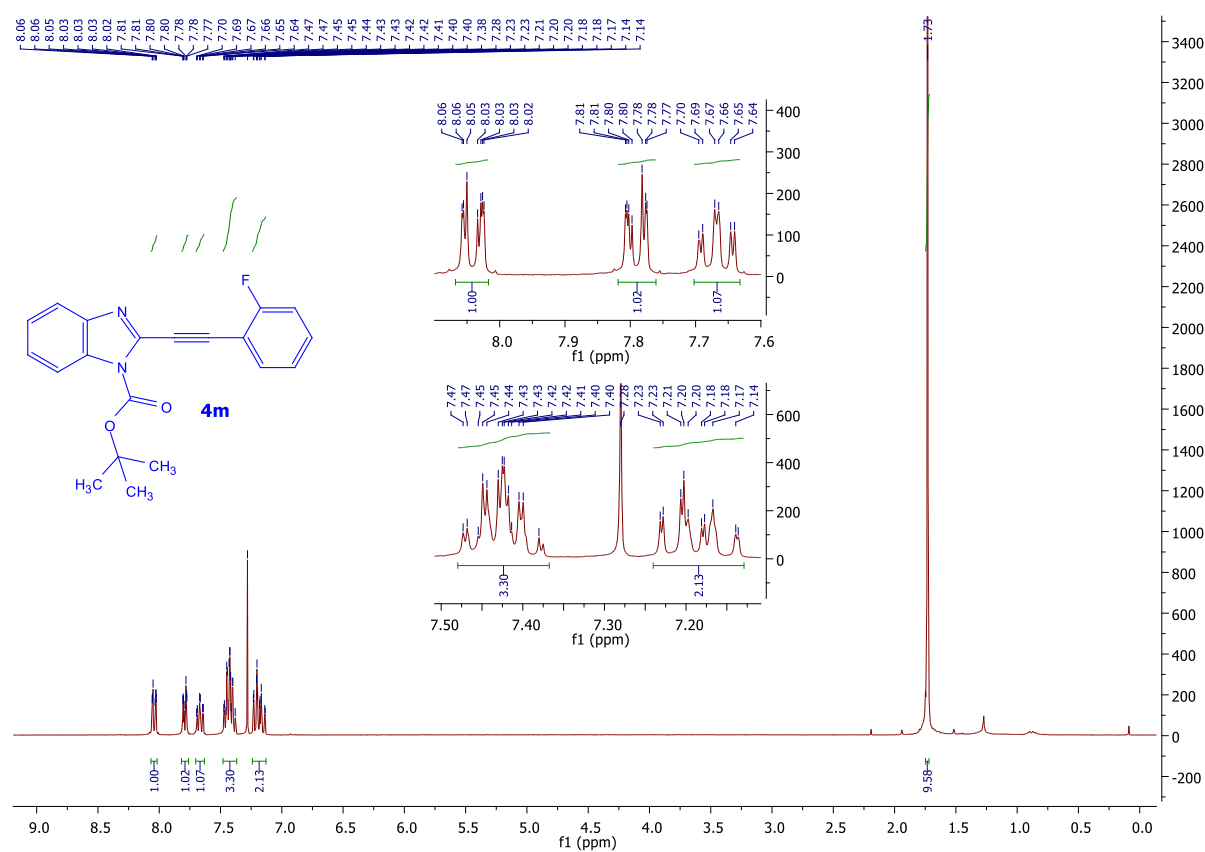

$^{19}\text{F}$  NMR (282 MHz,  $\text{CDCl}_3$ ) of **4m**

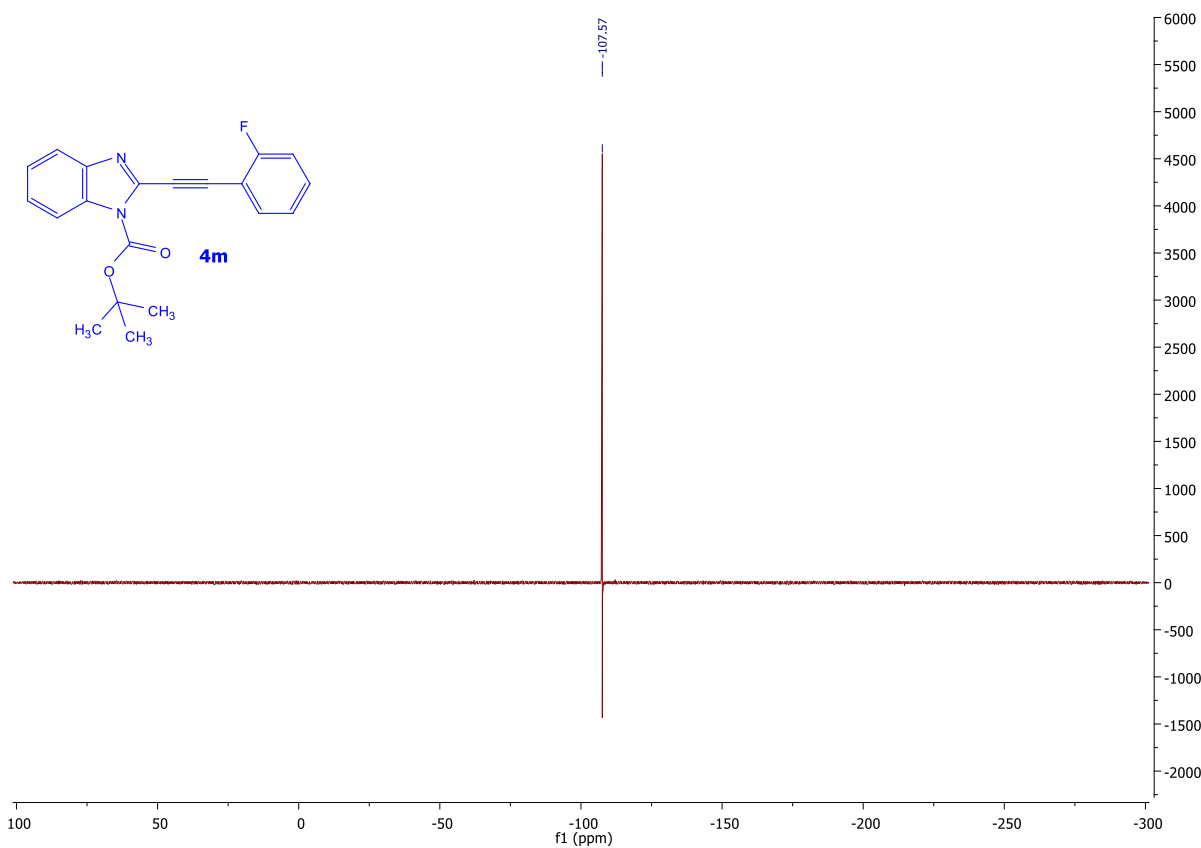

<sup>13</sup>C NMR (75 MHz, CDCl<sub>3</sub>) of **4m**

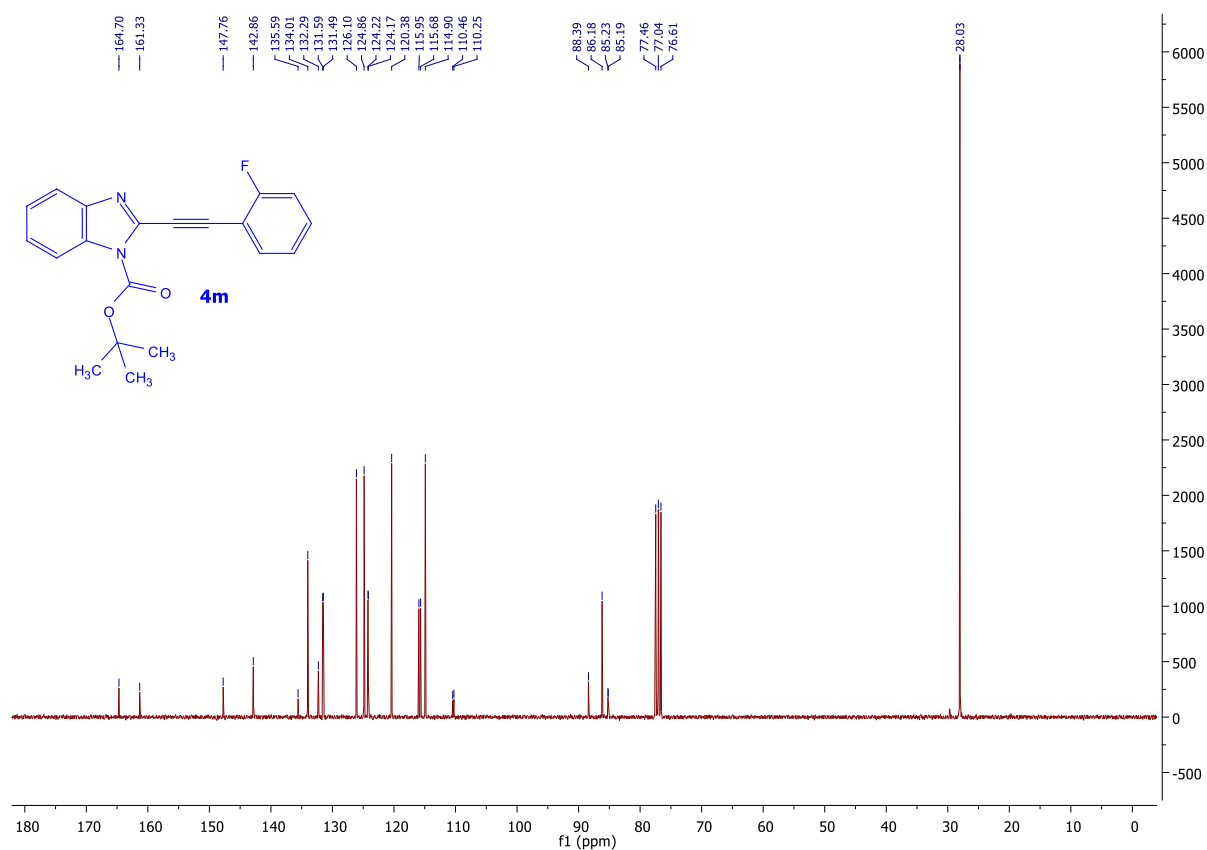

<sup>1</sup>H NMR (300 MHz, CDCl<sub>3</sub>) of **4n**

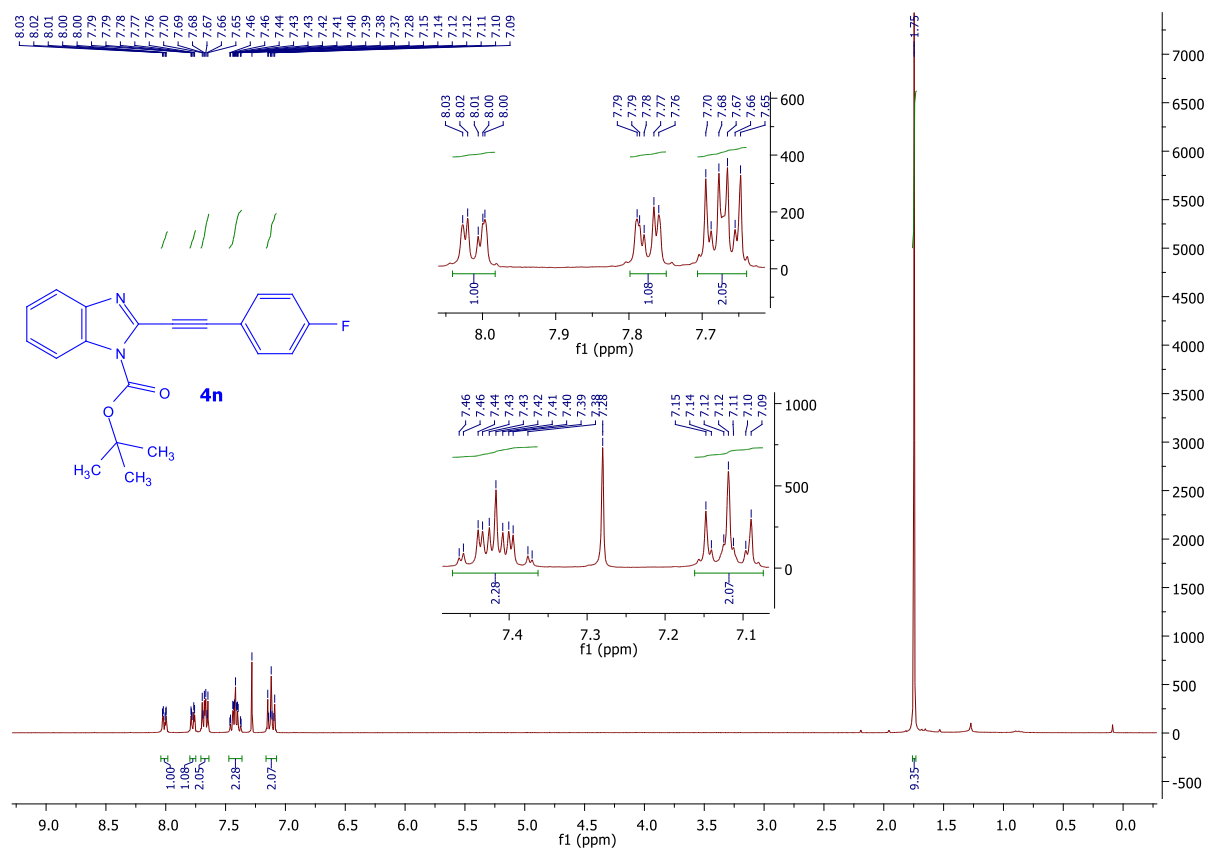

$^{19}\text{F}$  NMR (282 MHz,  $\text{CDCl}_3$ ) of **4n**

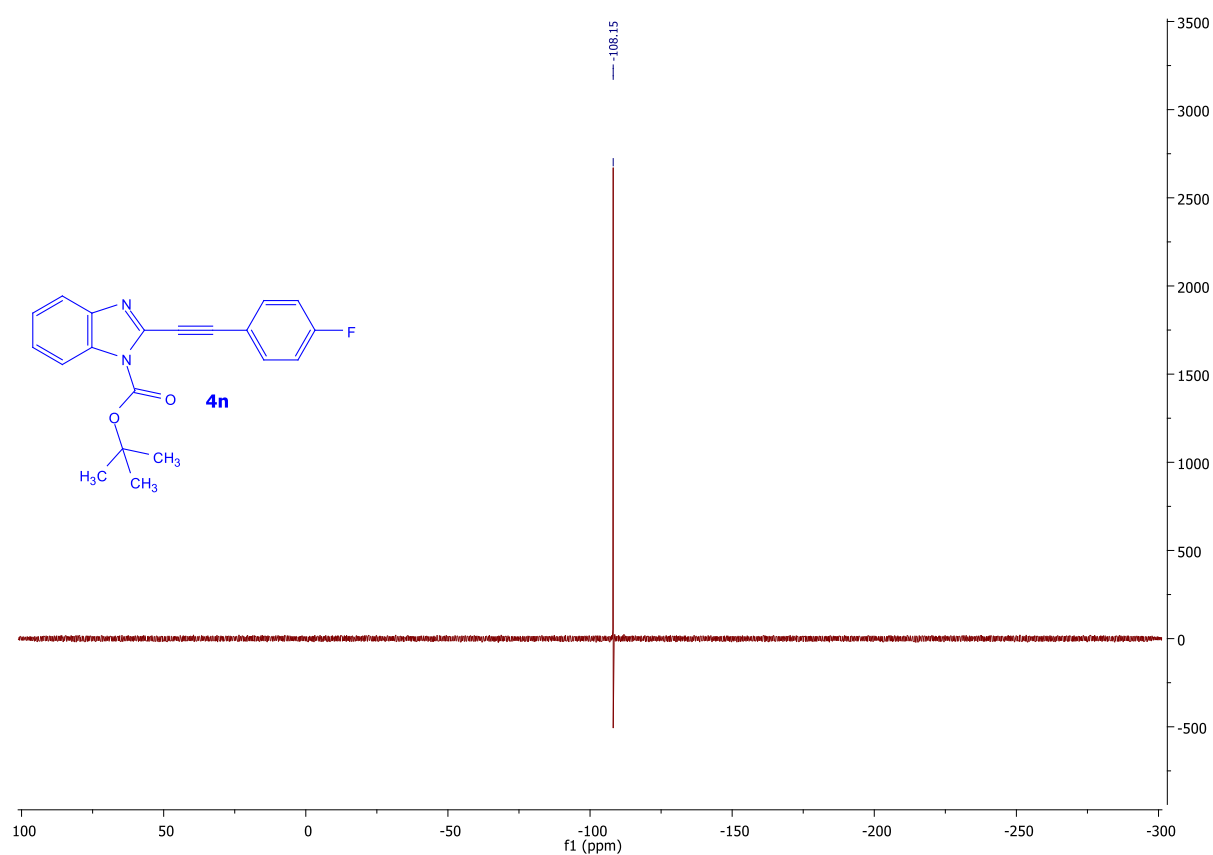

$^{13}\text{C}$  NMR (75 MHz,  $\text{CDCl}_3$ ) of **4n**

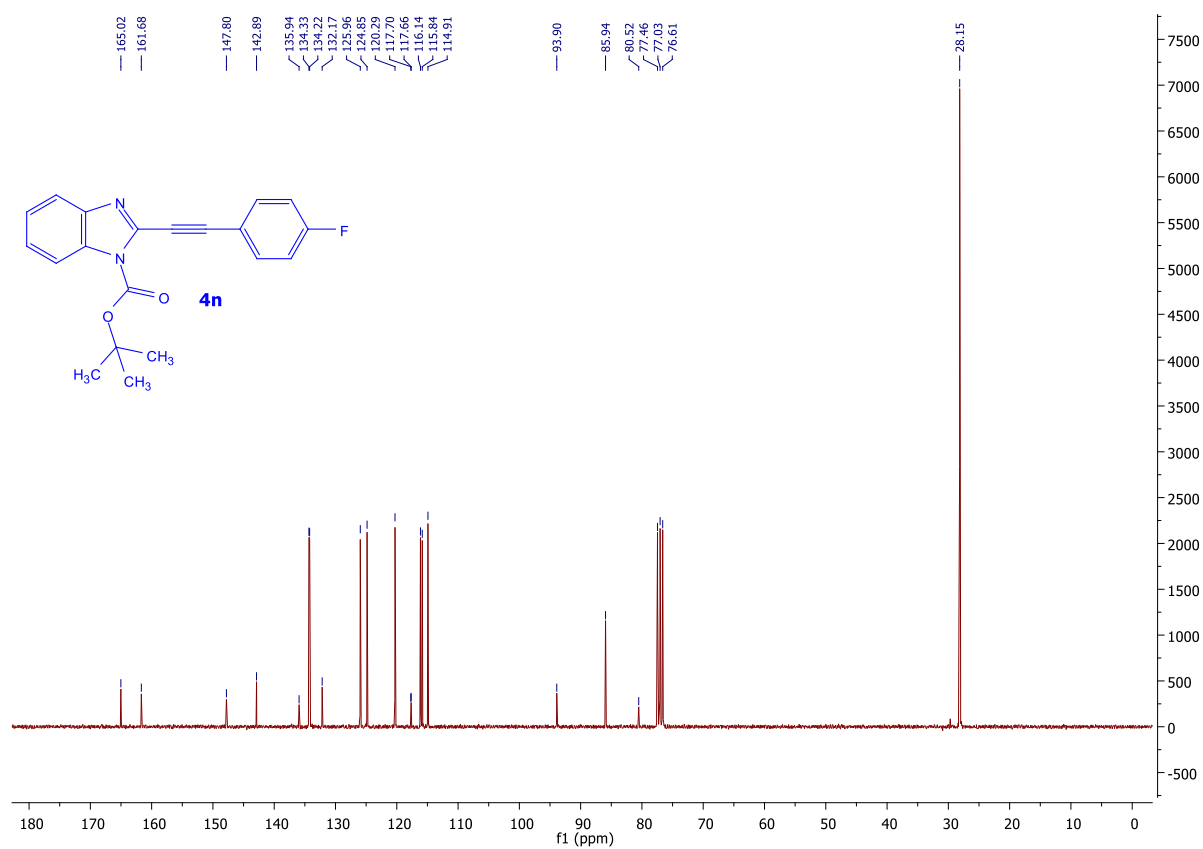



$^1\text{H}$  NMR (300 MHz,  $\text{CDCl}_3$ ) of **4o**

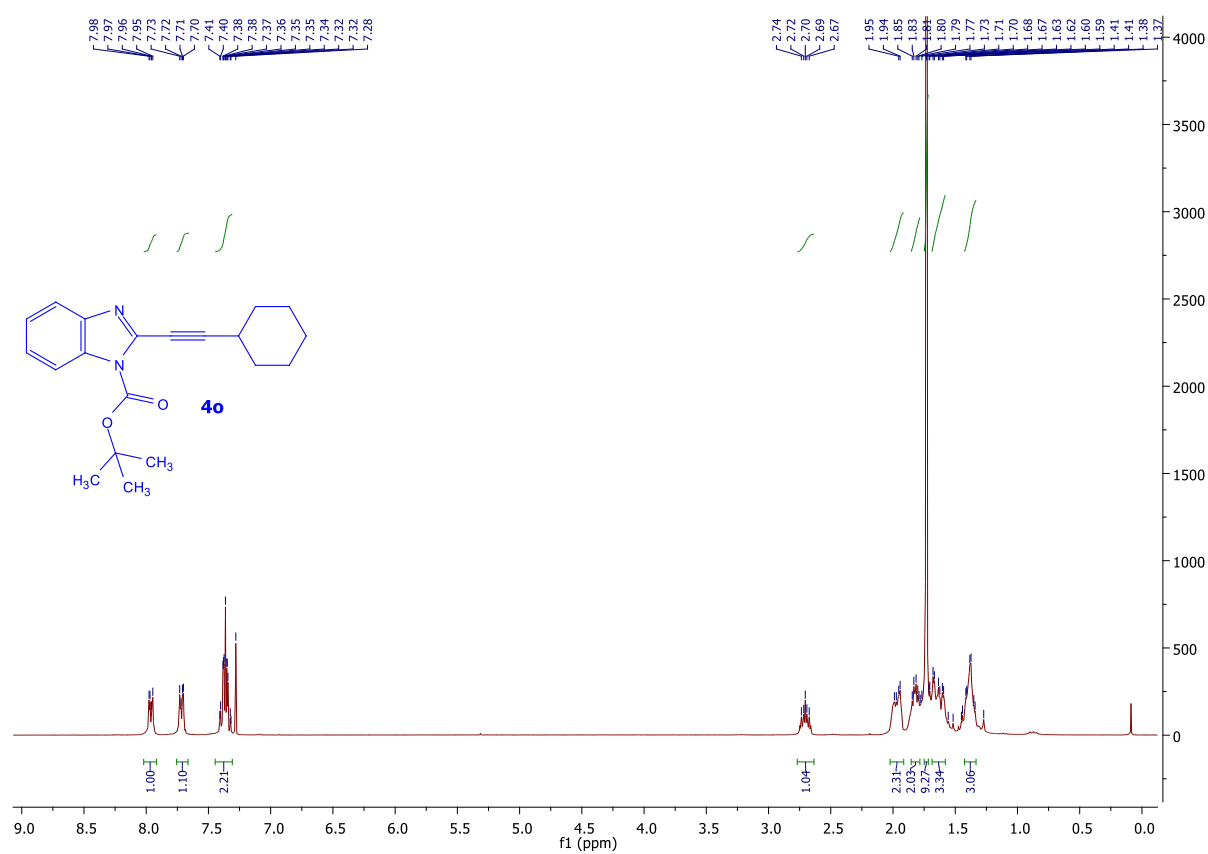

$^{13}\text{C}$  NMR (75 MHz,  $\text{CDCl}_3$ ) of **4o**

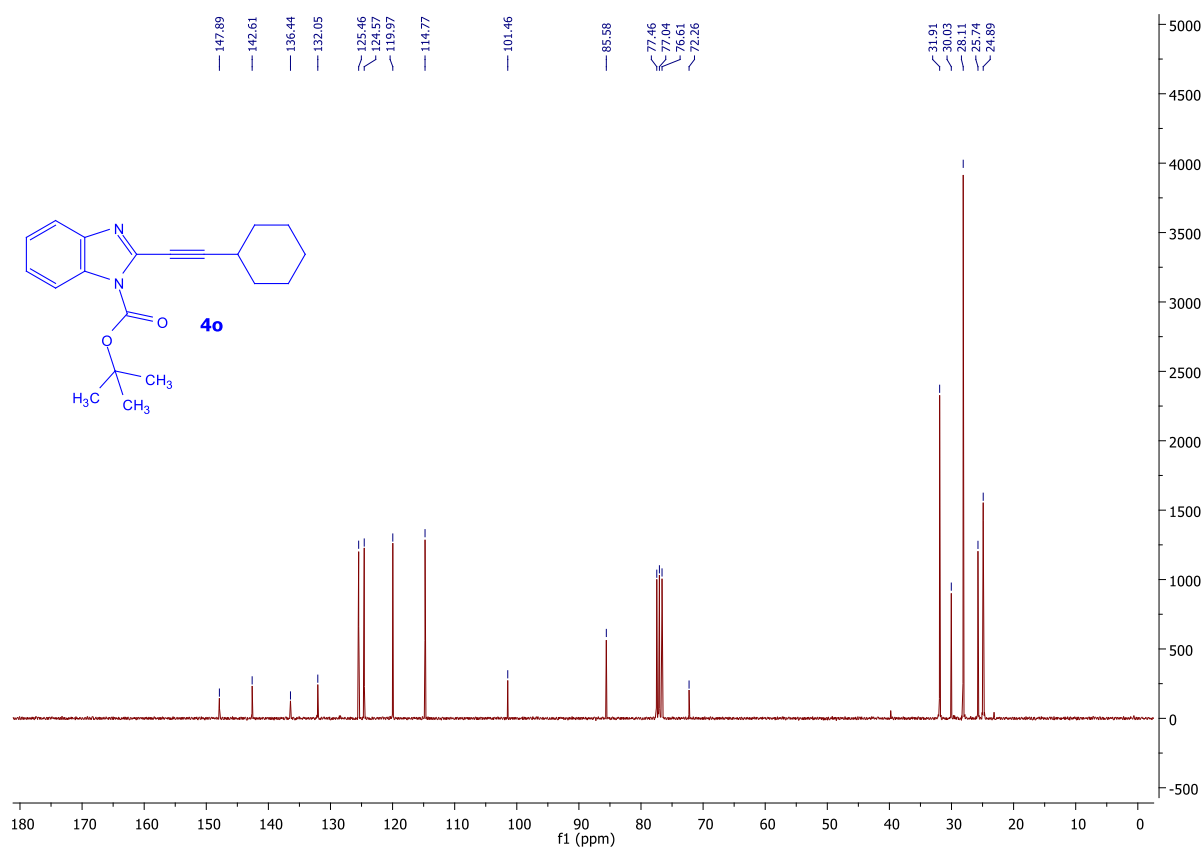

$^1\text{H}$  NMR (300 MHz,  $\text{CDCl}_3$ ) of **5a**

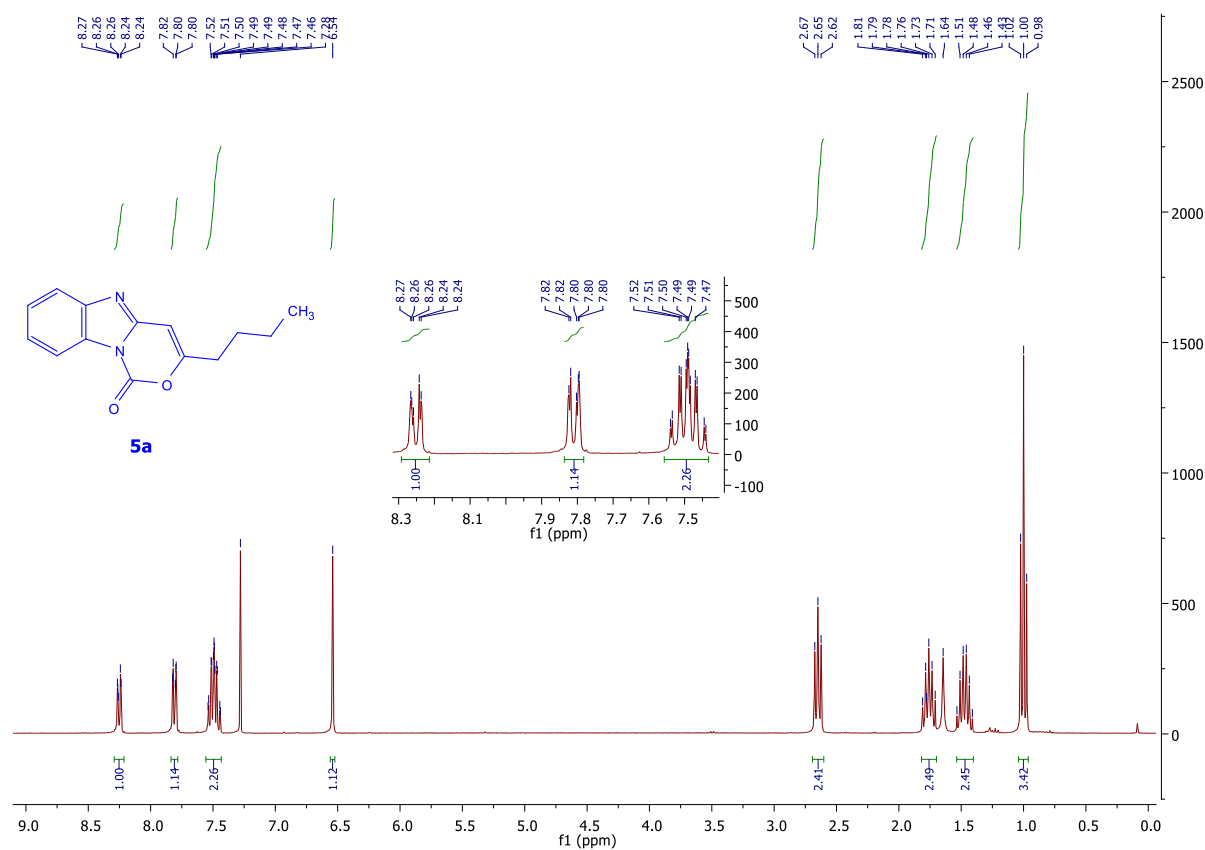

$^{13}\text{C}$  NMR (75 MHz,  $\text{CDCl}_3$ ) of **5a**

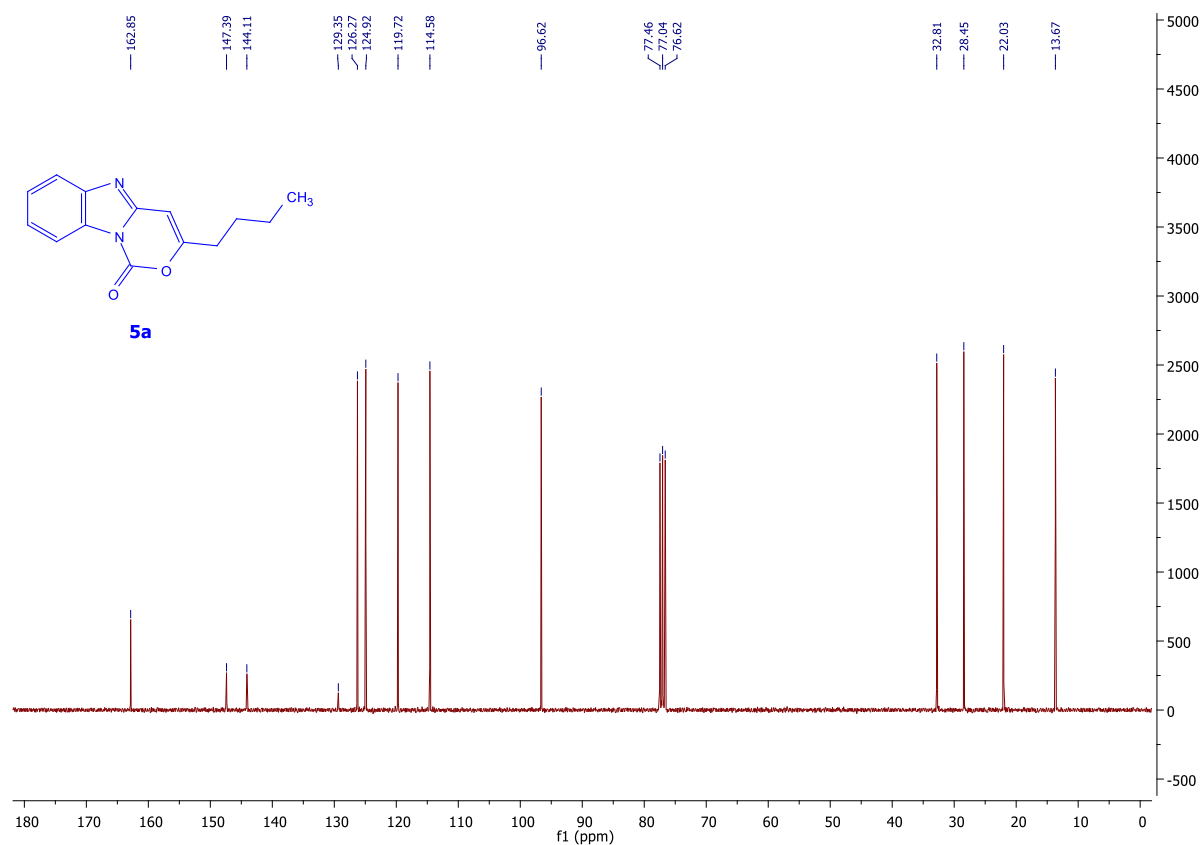

$^1\text{H}$  NMR (300 MHz,  $\text{CDCl}_3$ ) of **5b**

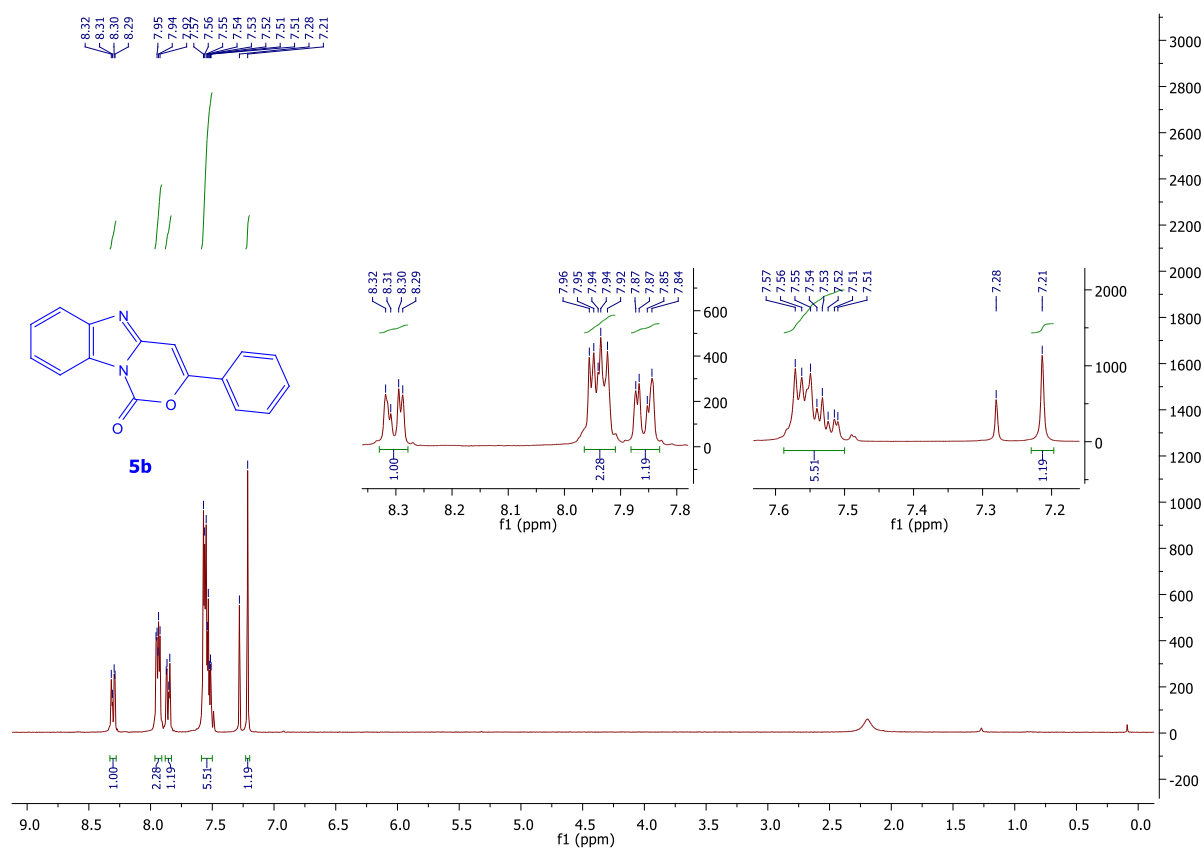

$^{13}\text{C}$  NMR (75 MHz,  $\text{CDCl}_3$ ) of **5b**

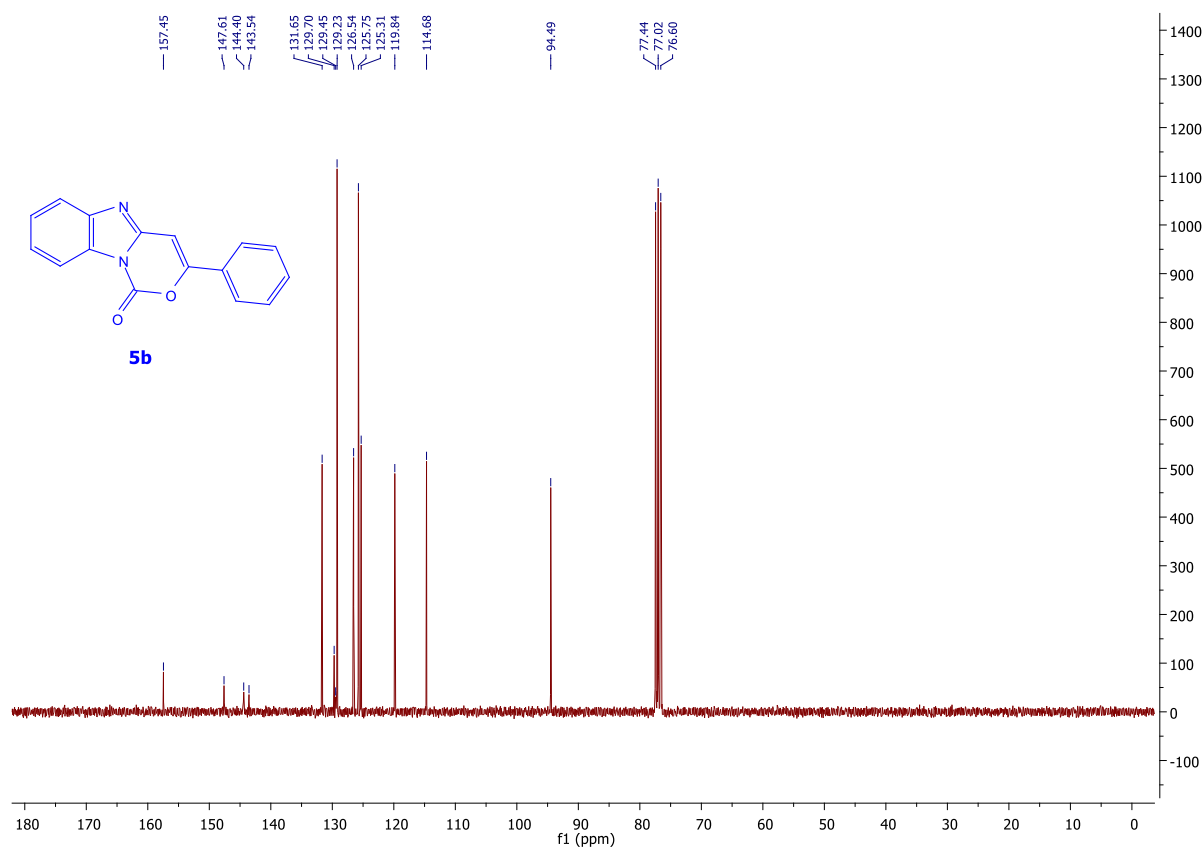

$^1\text{H}$  NMR (300 MHz,  $\text{CDCl}_3$ ) of **5c**

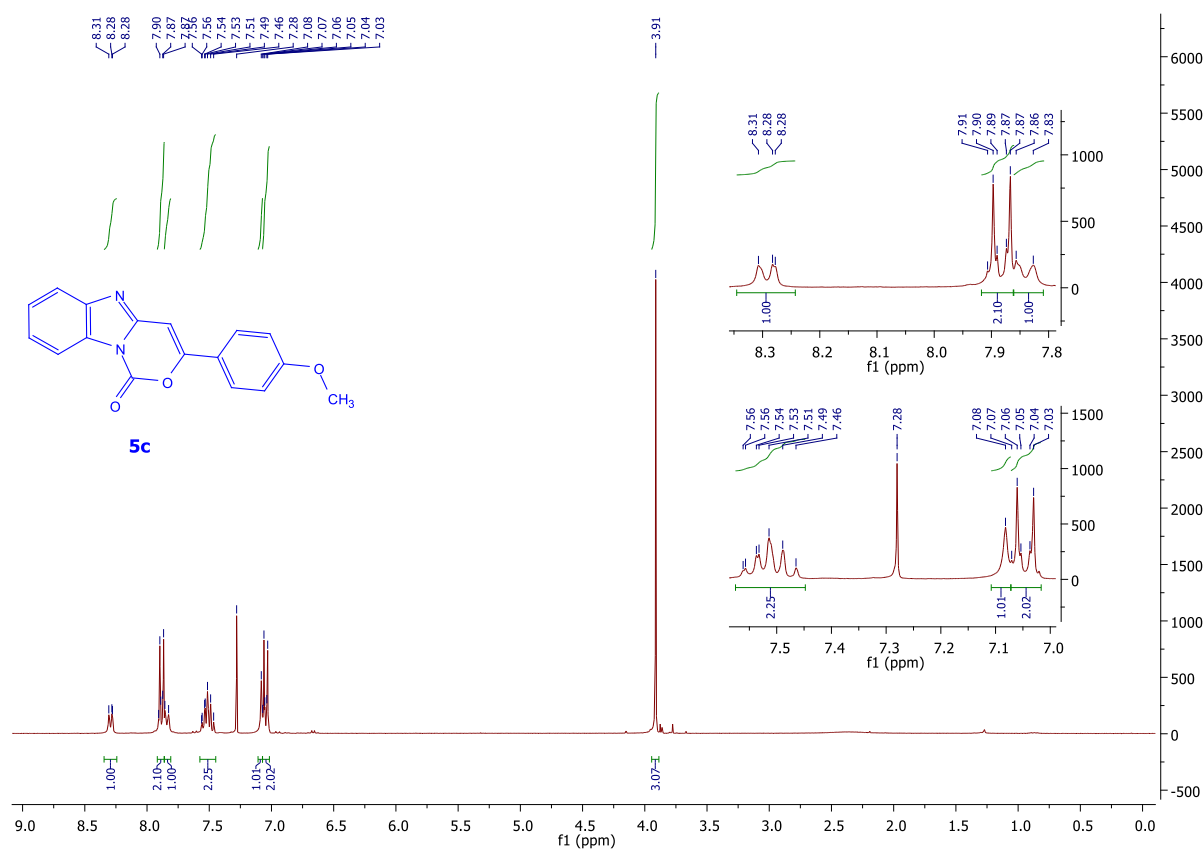

$^{13}\text{C}$  NMR (75 MHz,  $\text{CDCl}_3$ ) of **5c**

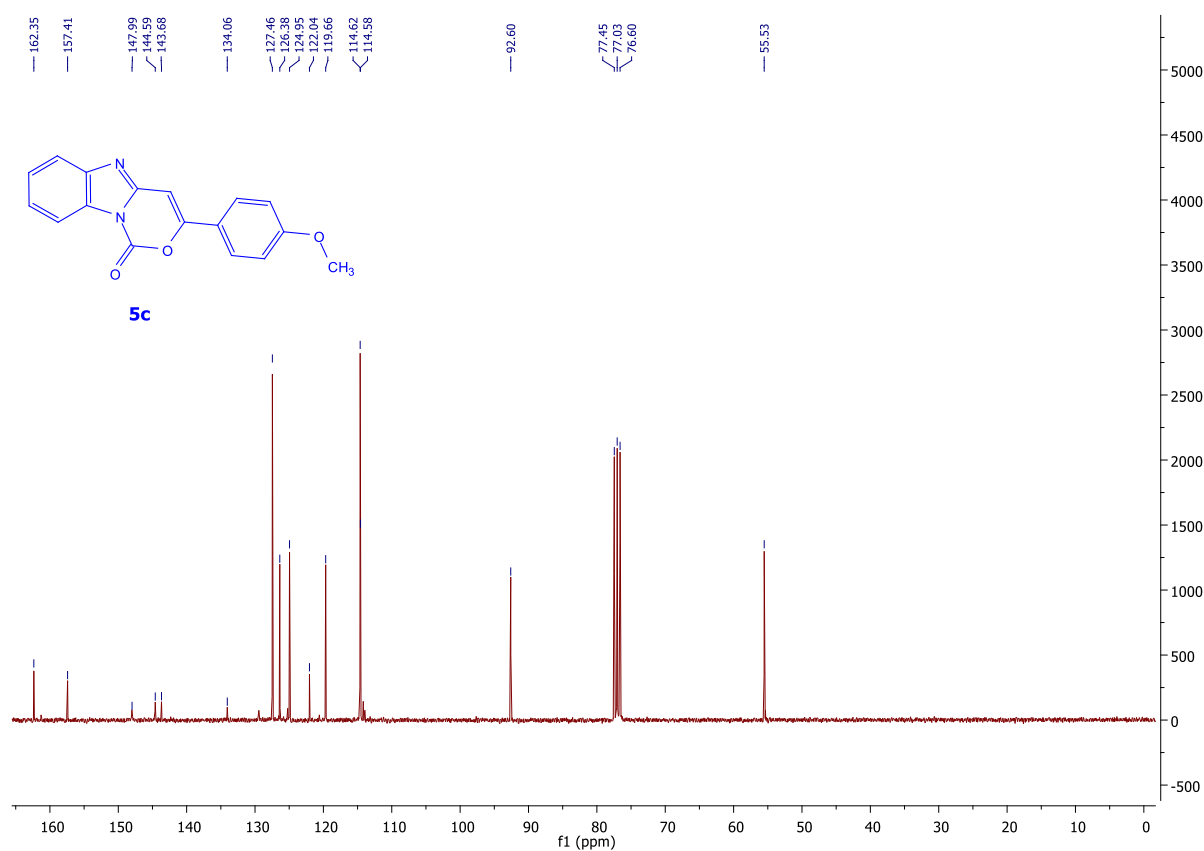

$^1\text{H}$  NMR (300 MHz,  $\text{CDCl}_3$ ) of **5d**

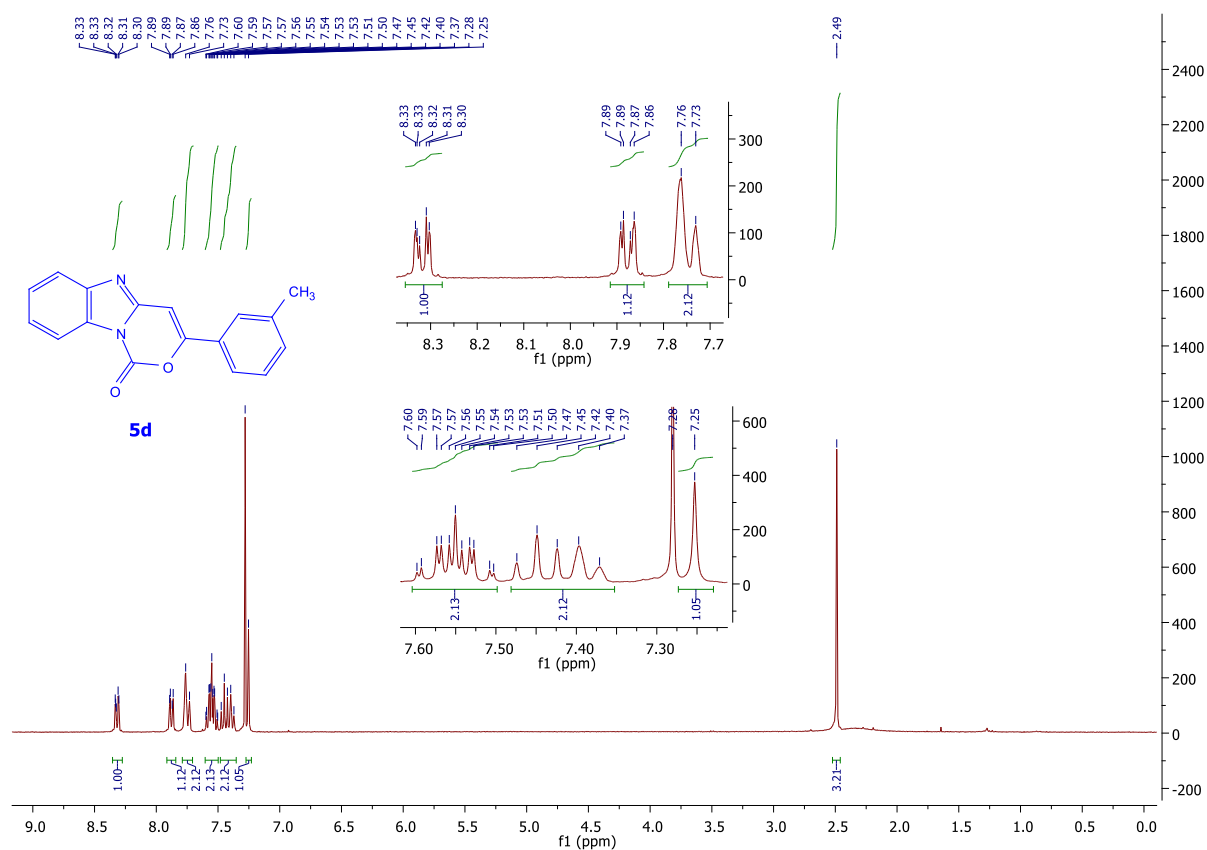

$^{13}\text{C}$  NMR (75 MHz,  $\text{CDCl}_3$ ) of **5d**

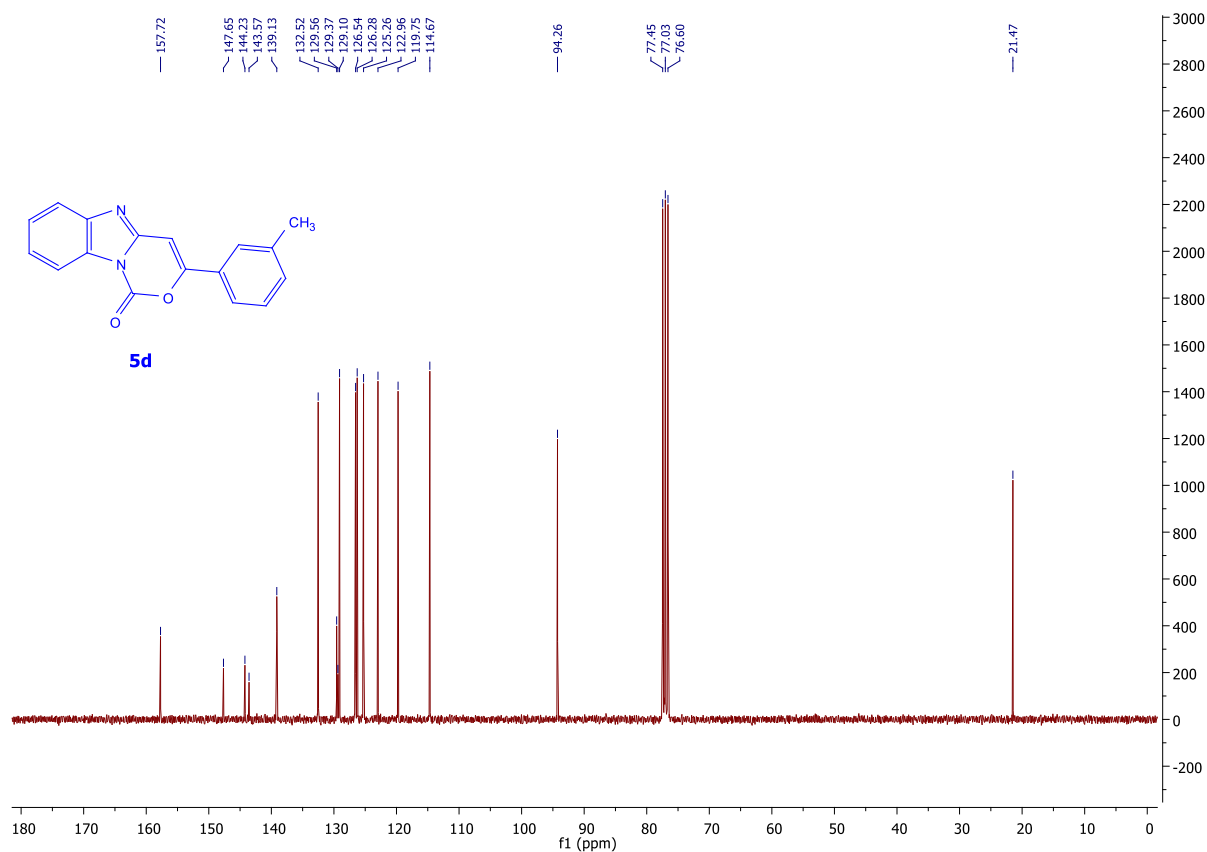

$^1\text{H}$  NMR (300 MHz,  $\text{CDCl}_3$ ) of **5e**

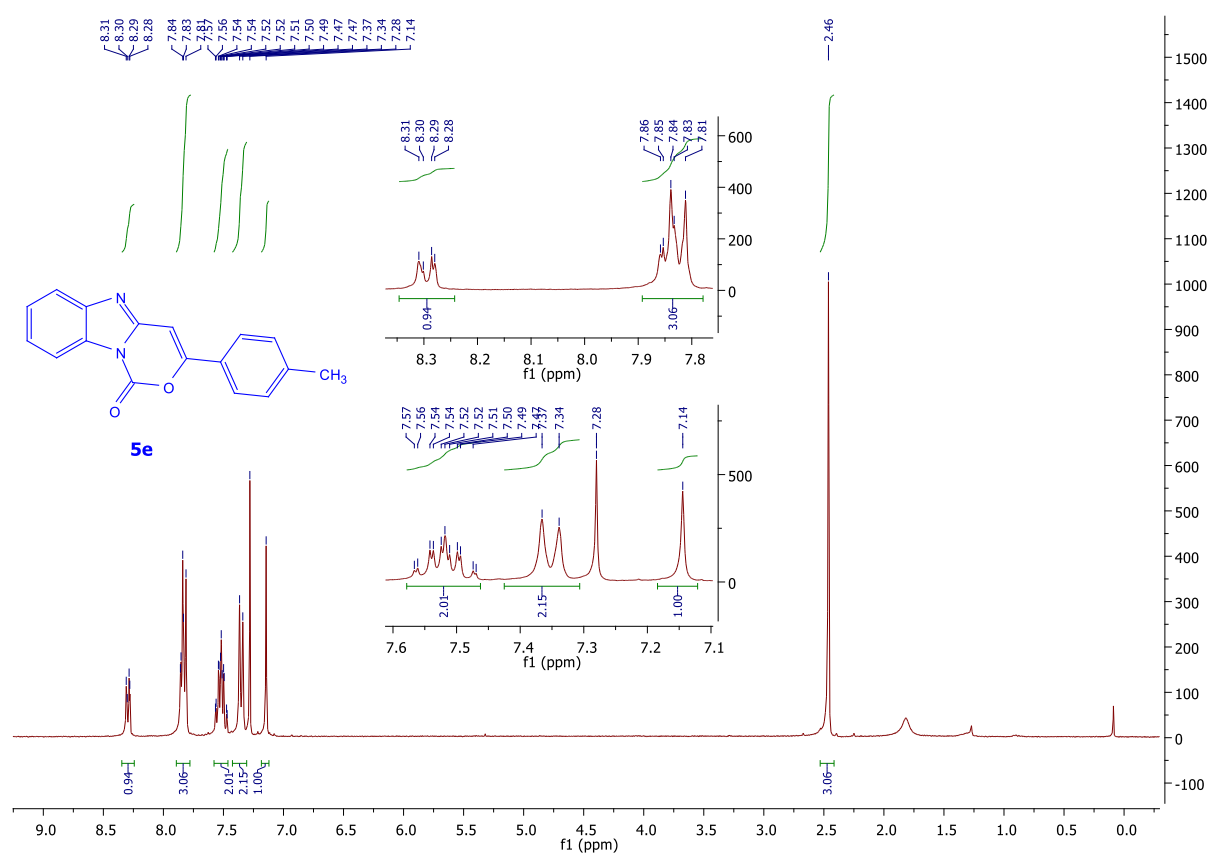

$^{13}\text{C}$  NMR (75 MHz,  $\text{CDCl}_3$ ) of **5e**

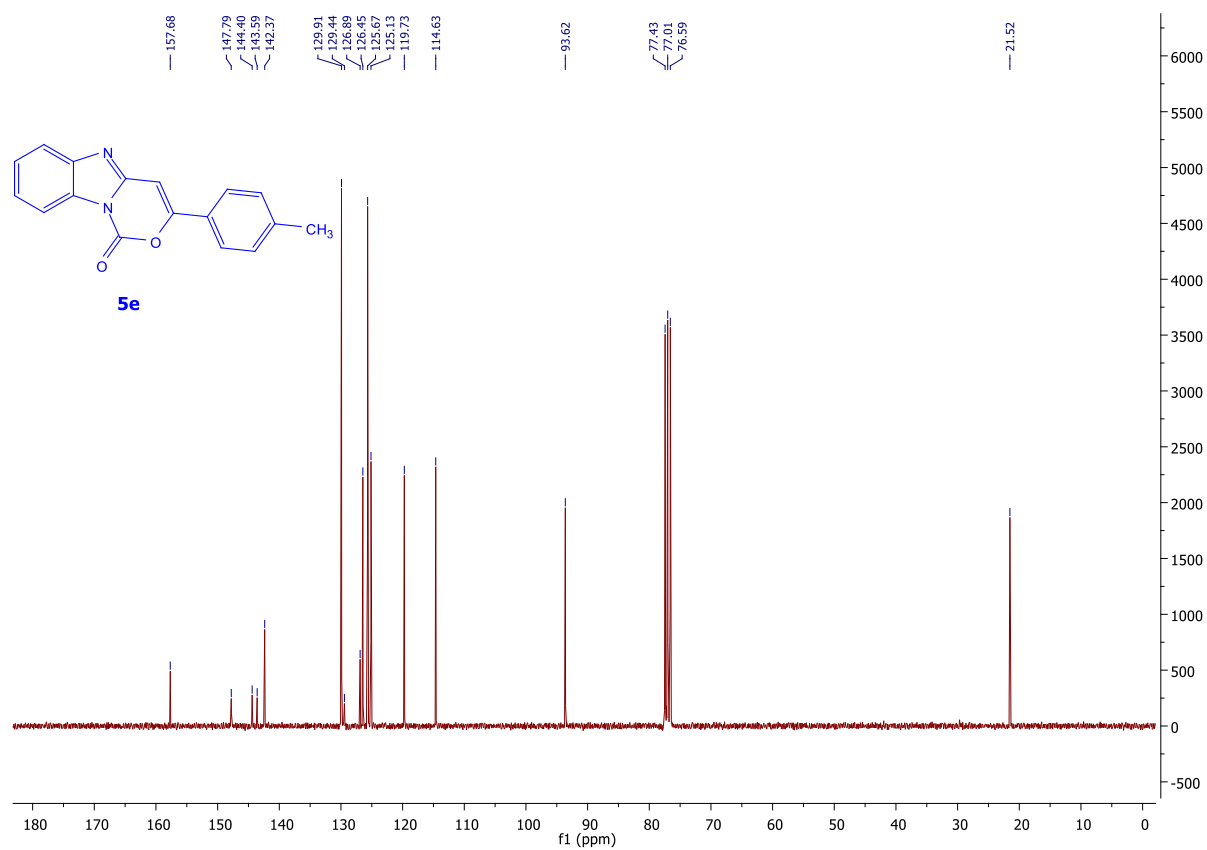

$^1\text{H}$  NMR (300 MHz,  $\text{CDCl}_3$ ) of **5f**

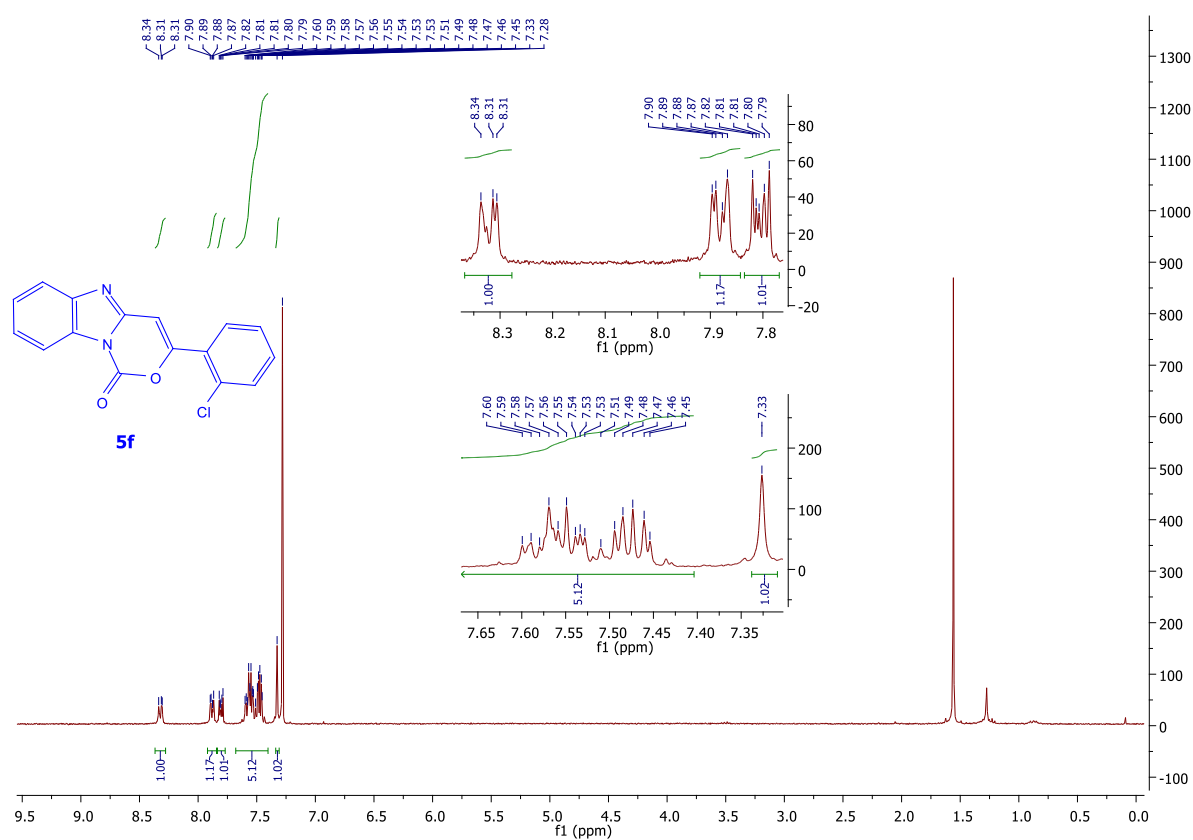

$^{13}\text{C}$  NMR (75 MHz,  $\text{CDCl}_3$ ) of **5f**

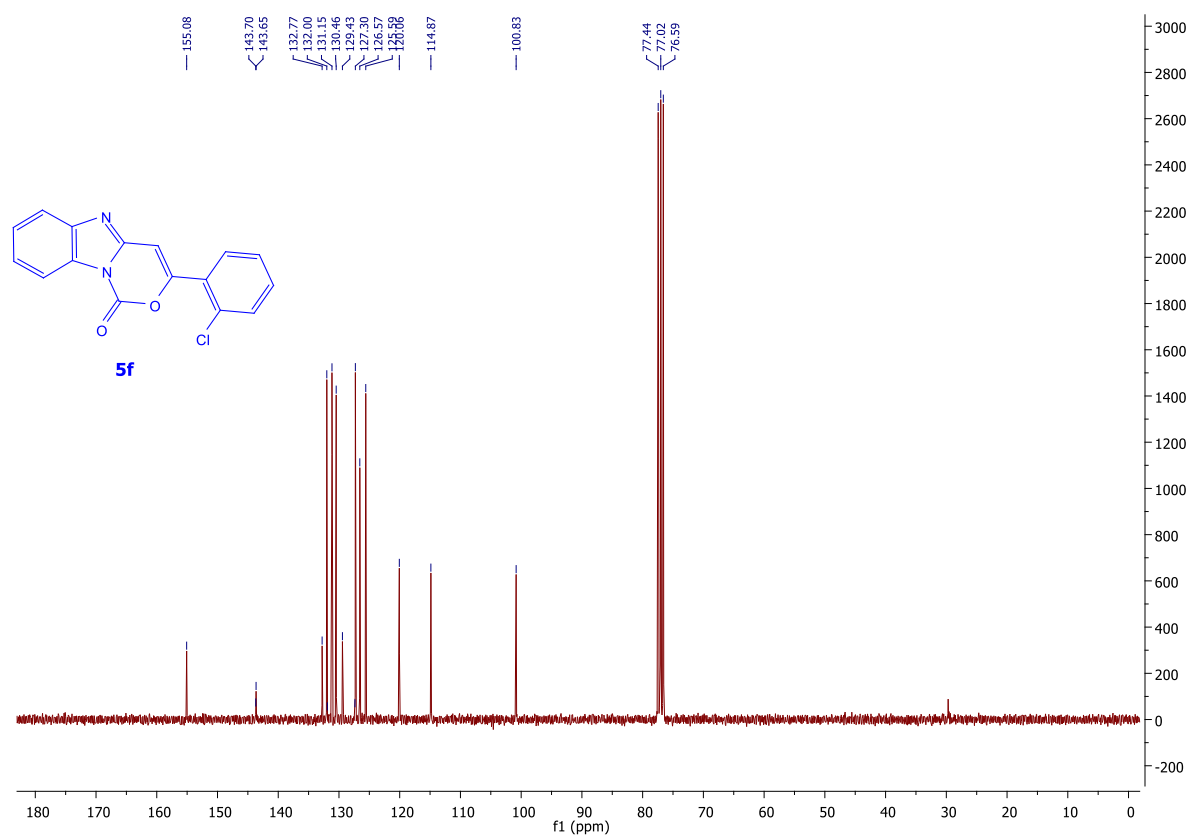

$^1\text{H}$  NMR (300 MHz, DMSO- $d_6$ ) of **5g**

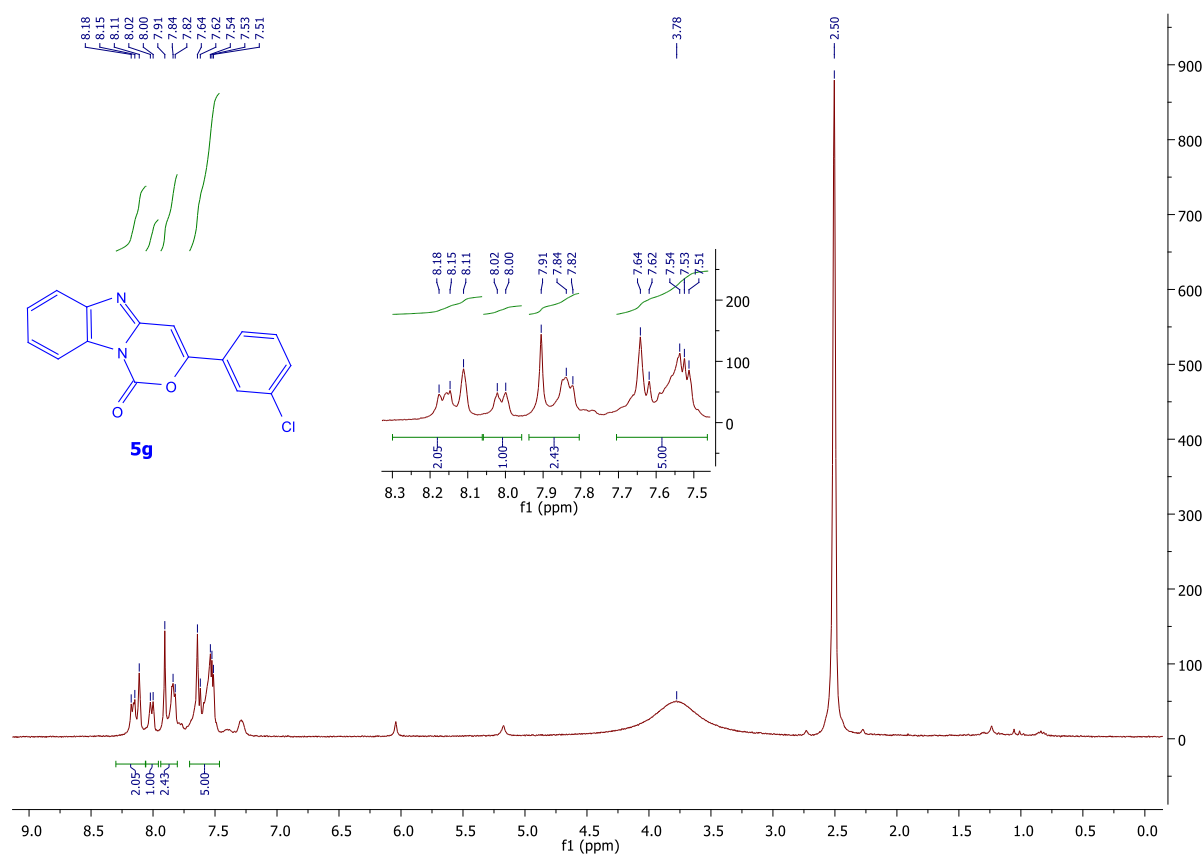

$^{13}\text{C}$  NMR (75 MHz,  $\text{CDCl}_3$ ) of **5g**

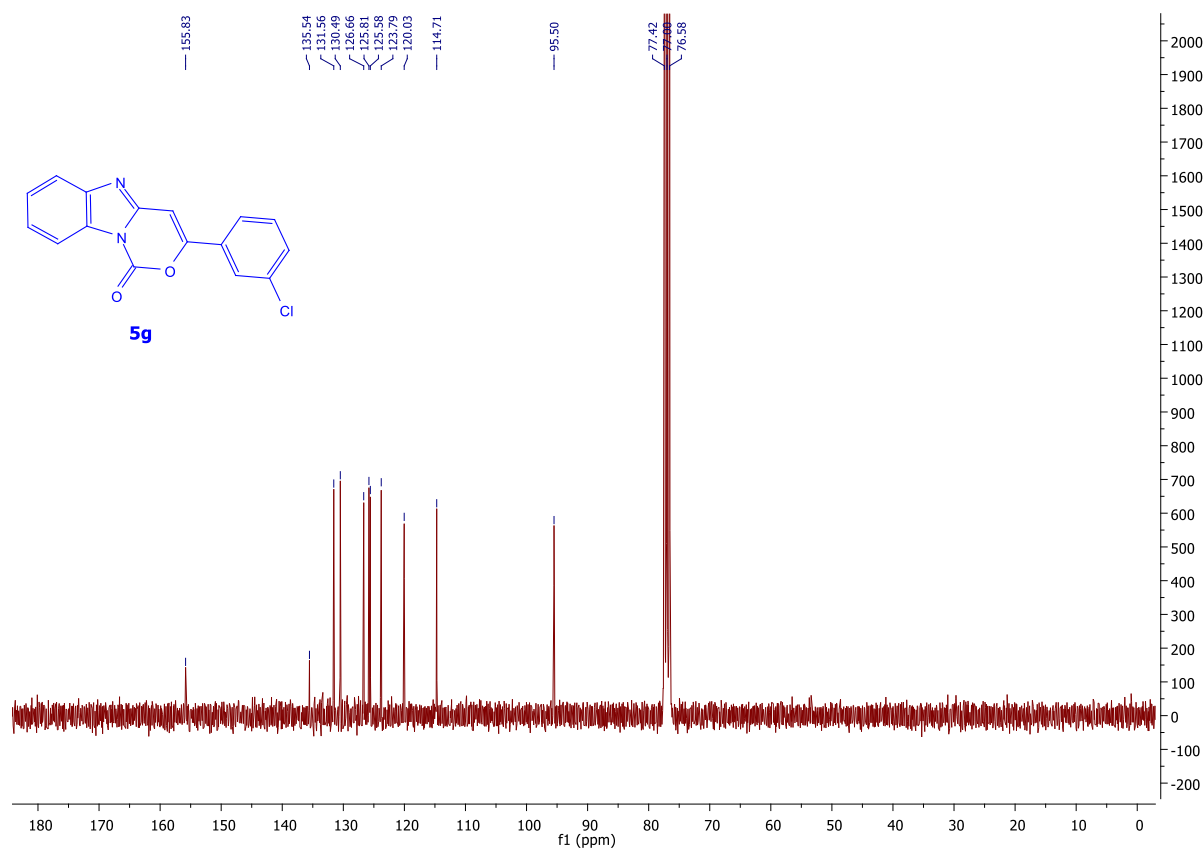



$^1\text{H}$  NMR (300 MHz,  $\text{CDCl}_3$ ) of **5h**

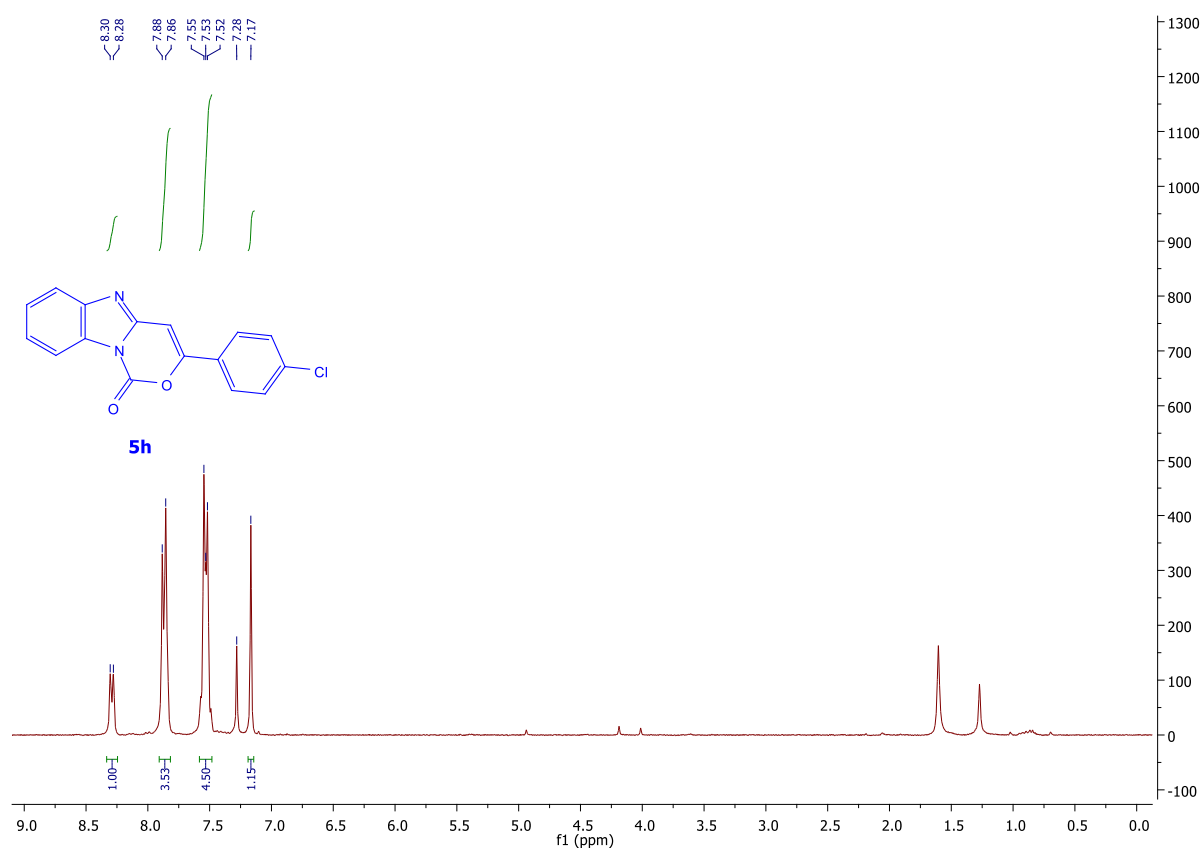

$^{13}\text{C}$  NMR (75 MHz,  $\text{CDCl}_3$ ) of **5h**

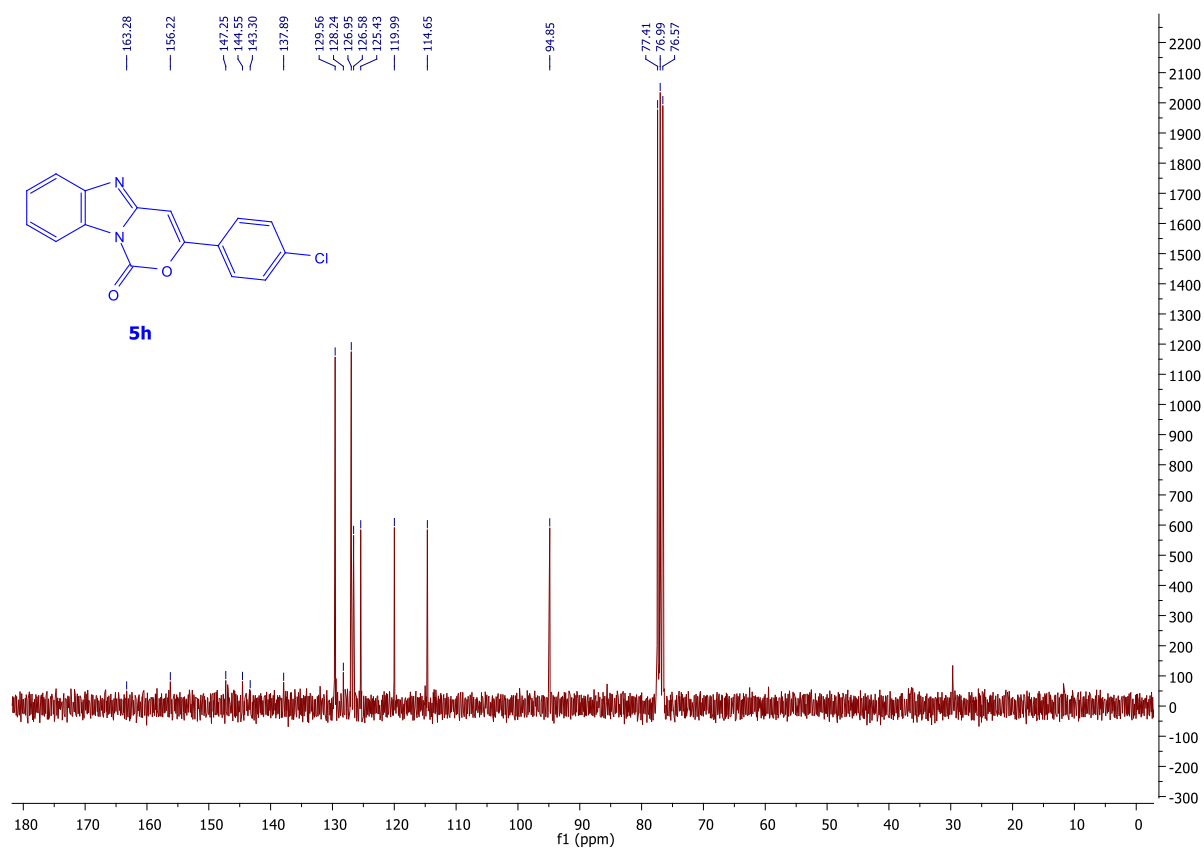

<sup>1</sup>H NMR (300 MHz, CDCl<sub>3</sub>) of **5i**

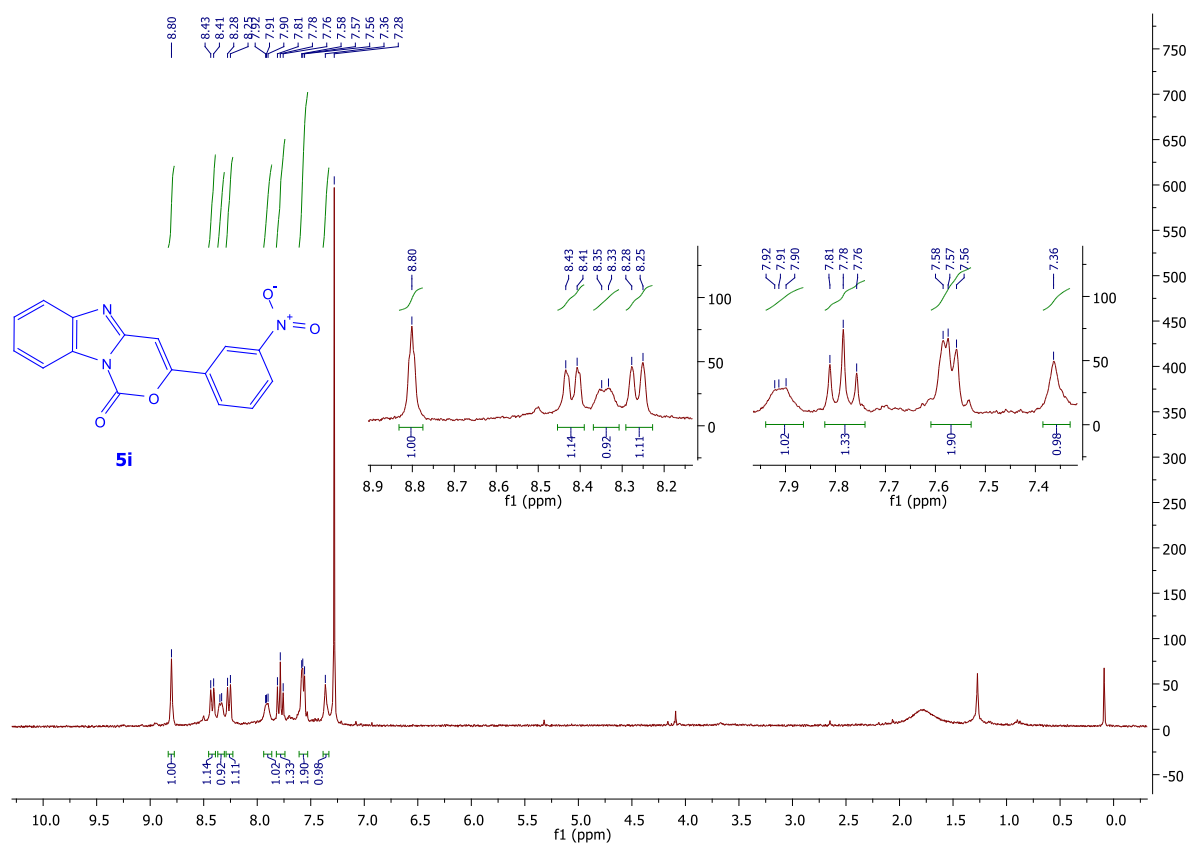

<sup>13</sup>C NMR (75 MHz, CDCl<sub>3</sub>/TFA-*d*<sub>1</sub>) of **5i**

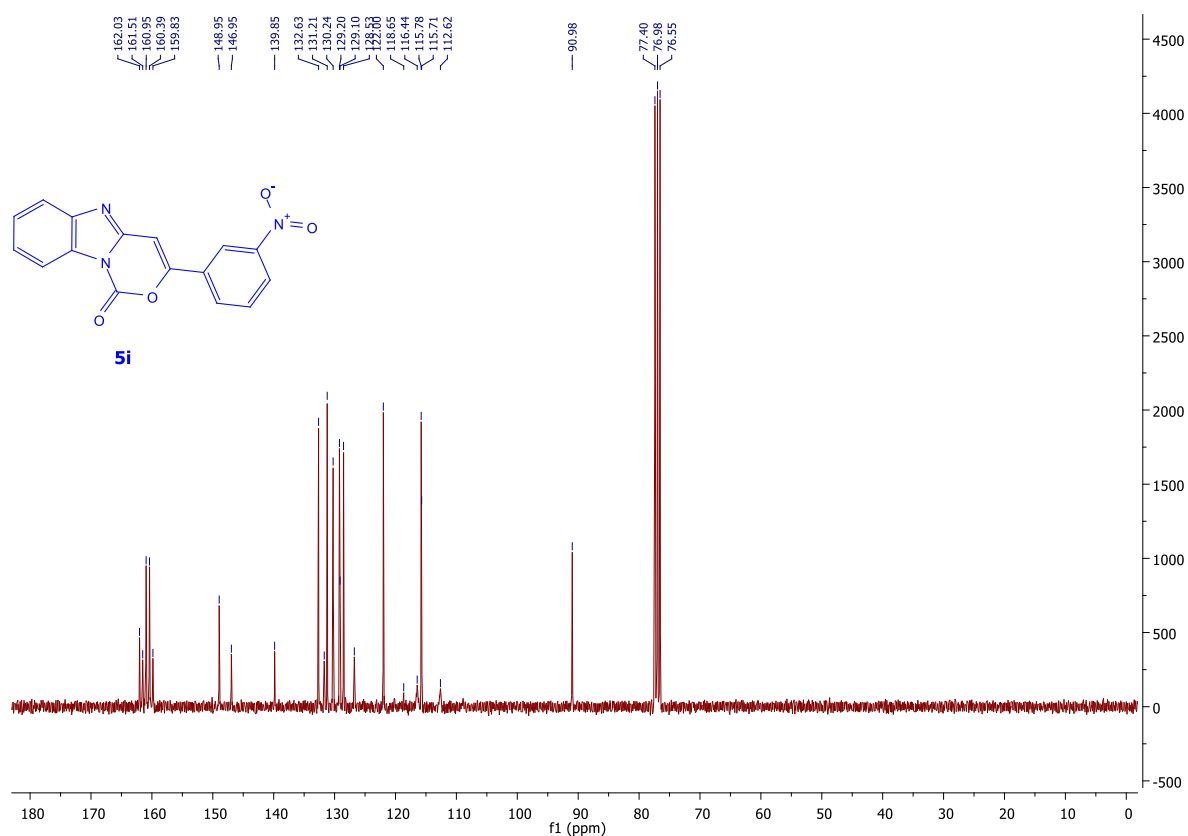

$^1\text{H}$  NMR (300 MHz,  $\text{CDCl}_3$ ) of **5j**

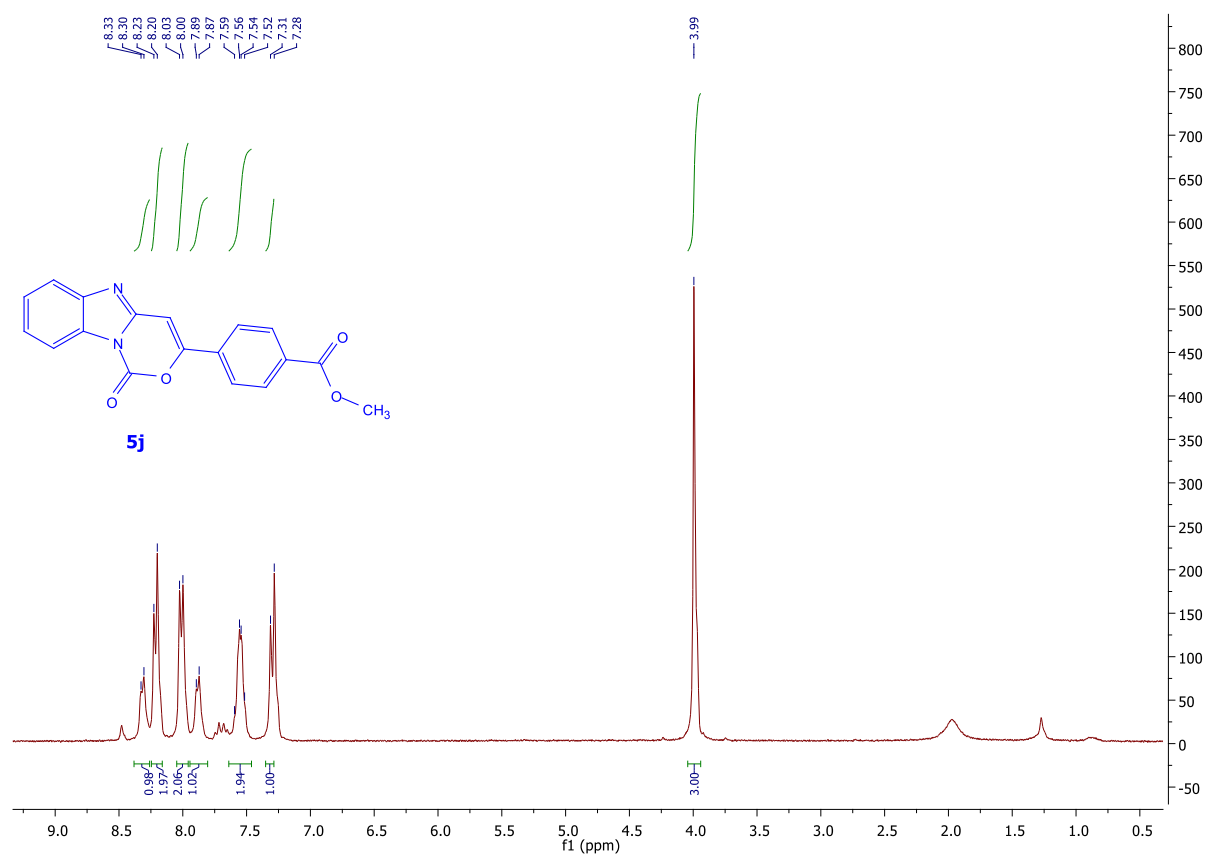

$^{13}\text{C}$  NMR (75 MHz,  $\text{CDCl}_3/\text{TFA}-d_1$ ) of **5j**

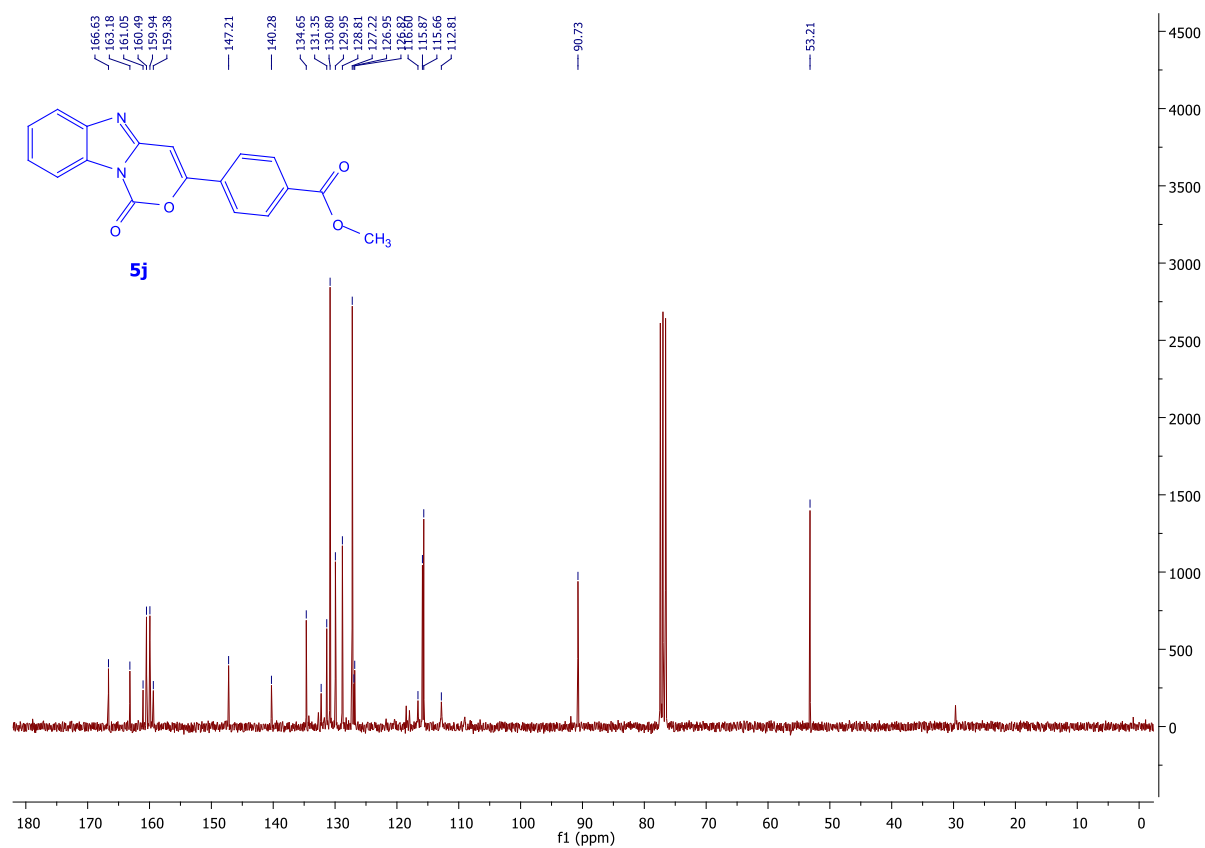

$^1\text{H}$  NMR (300 MHz,  $\text{CDCl}_3$ ) of **5k**

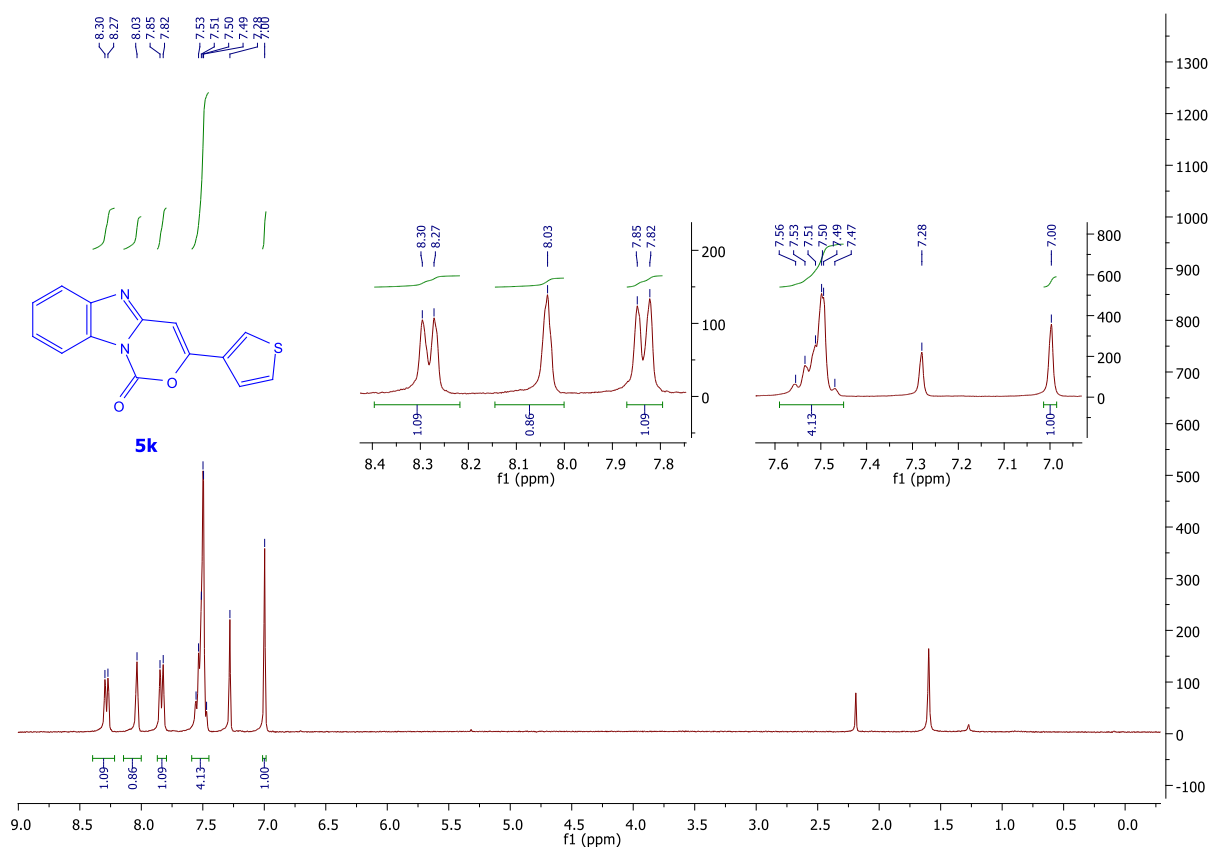

$^{13}\text{C}$  NMR (75 MHz,  $\text{CDCl}_3$ ) of **5k**

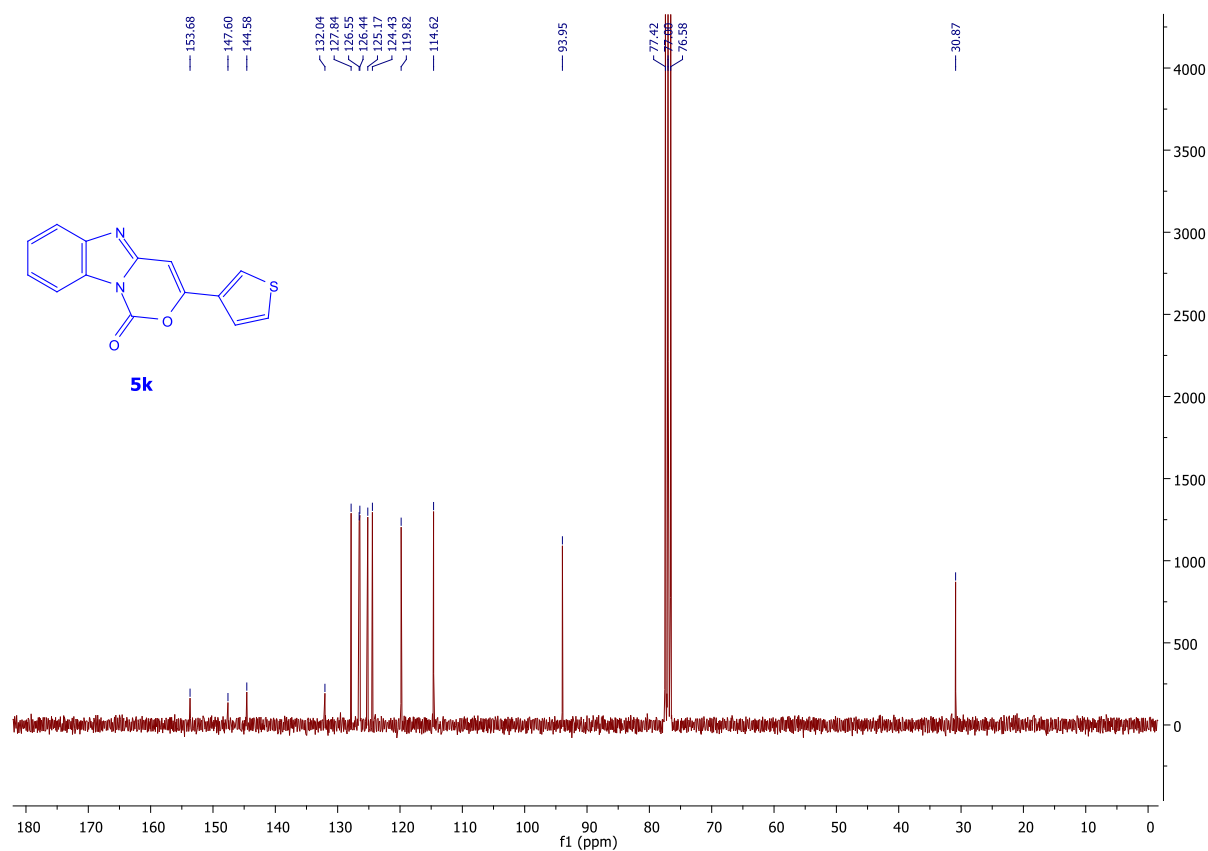

$^1\text{H}$  NMR (300 MHz,  $\text{CDCl}_3$ ) of **5I**

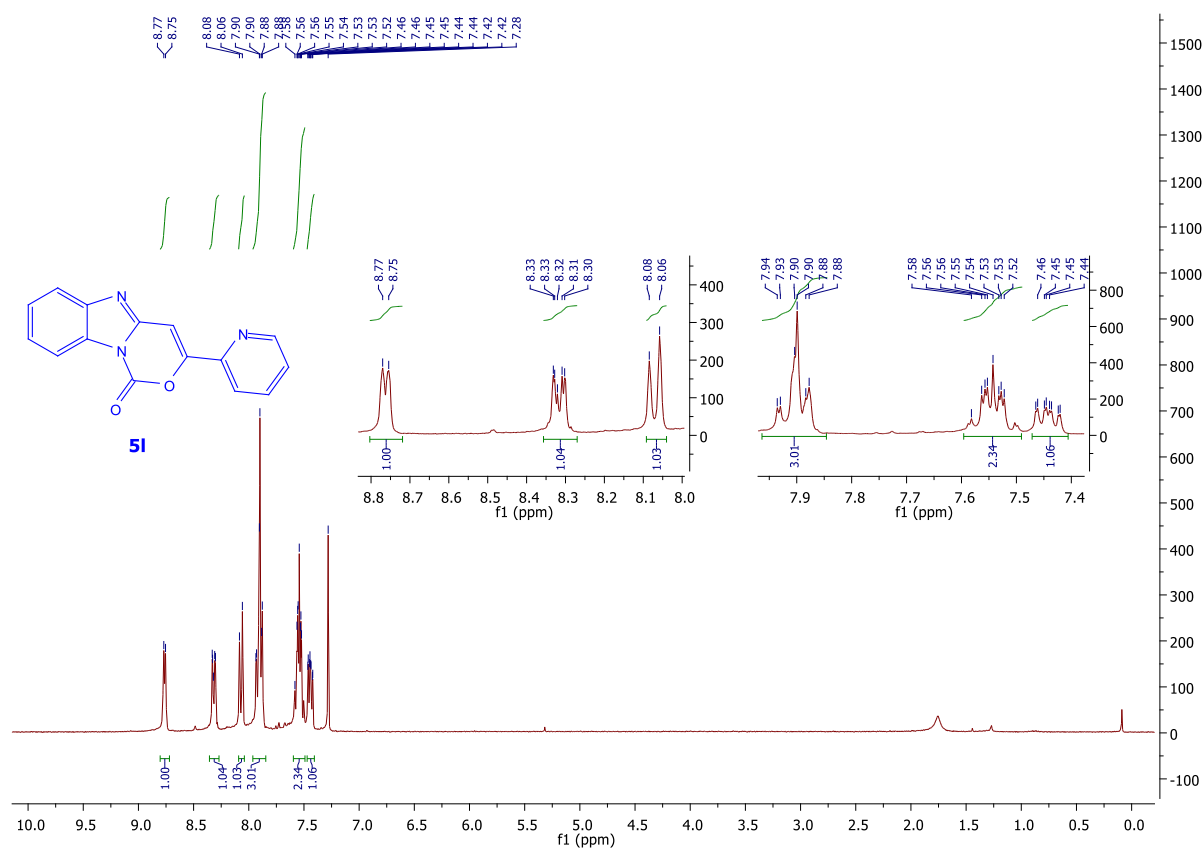

$^{13}\text{C}$  NMR (75 MHz,  $\text{CDCl}_3$ ) of **5I**

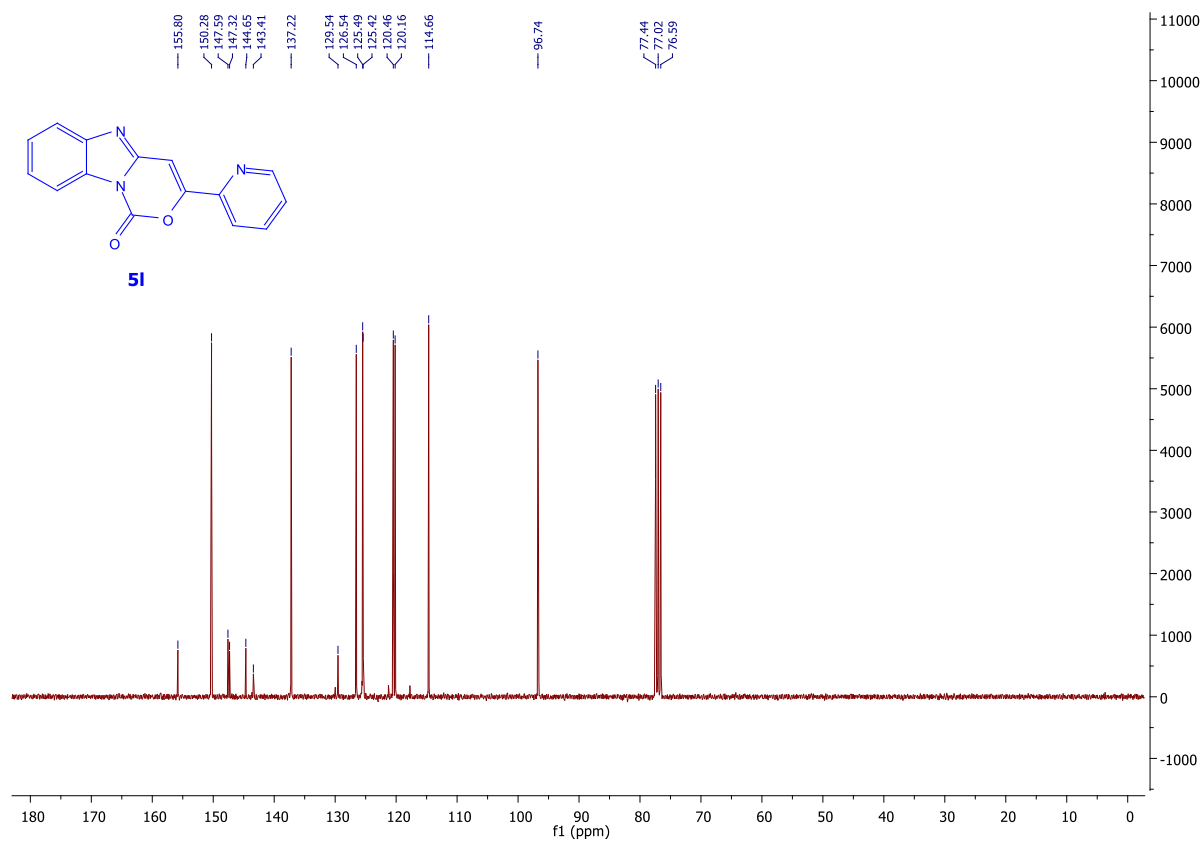

$^1\text{H}$  NMR (300 MHz,  $\text{CDCl}_3$ ) of **5m**

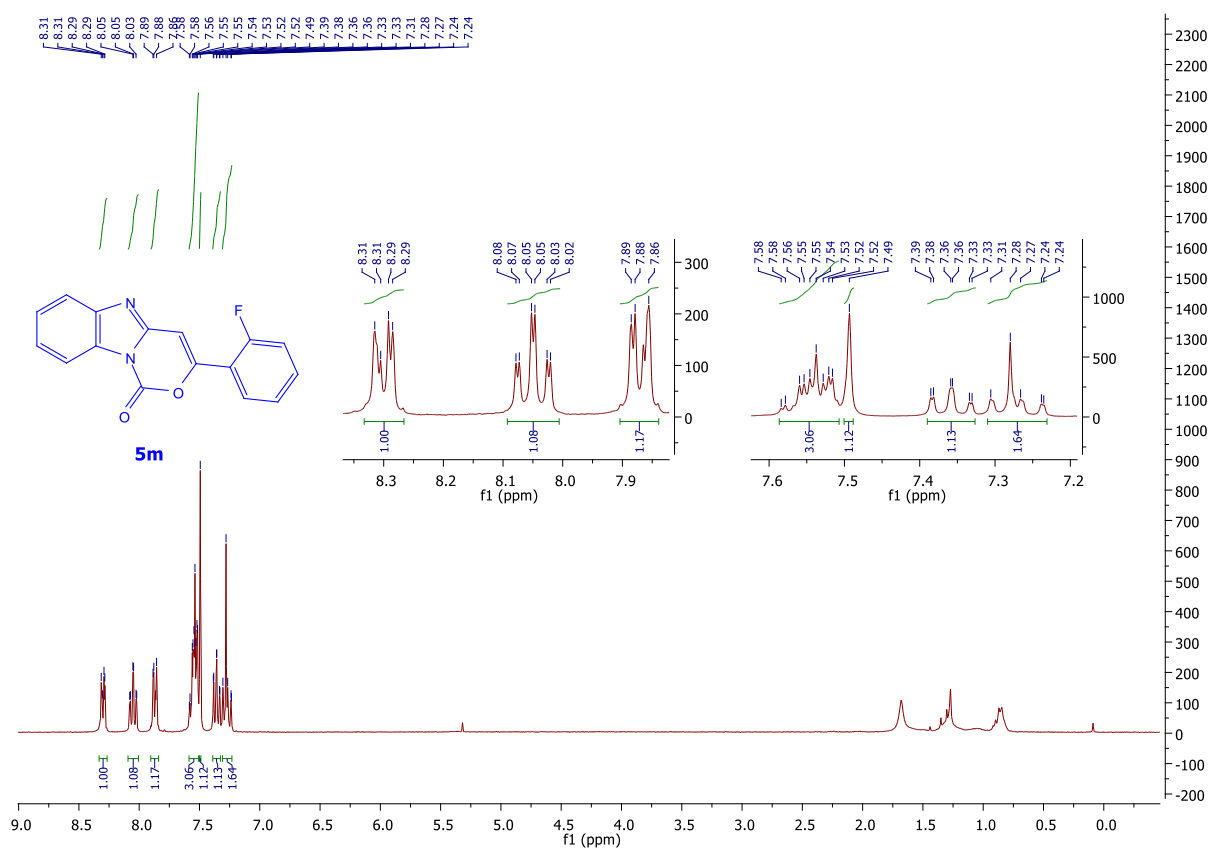

$^{19}\text{F}$  NMR (282 MHz,  $\text{CDCl}_3$ ) of **5m**

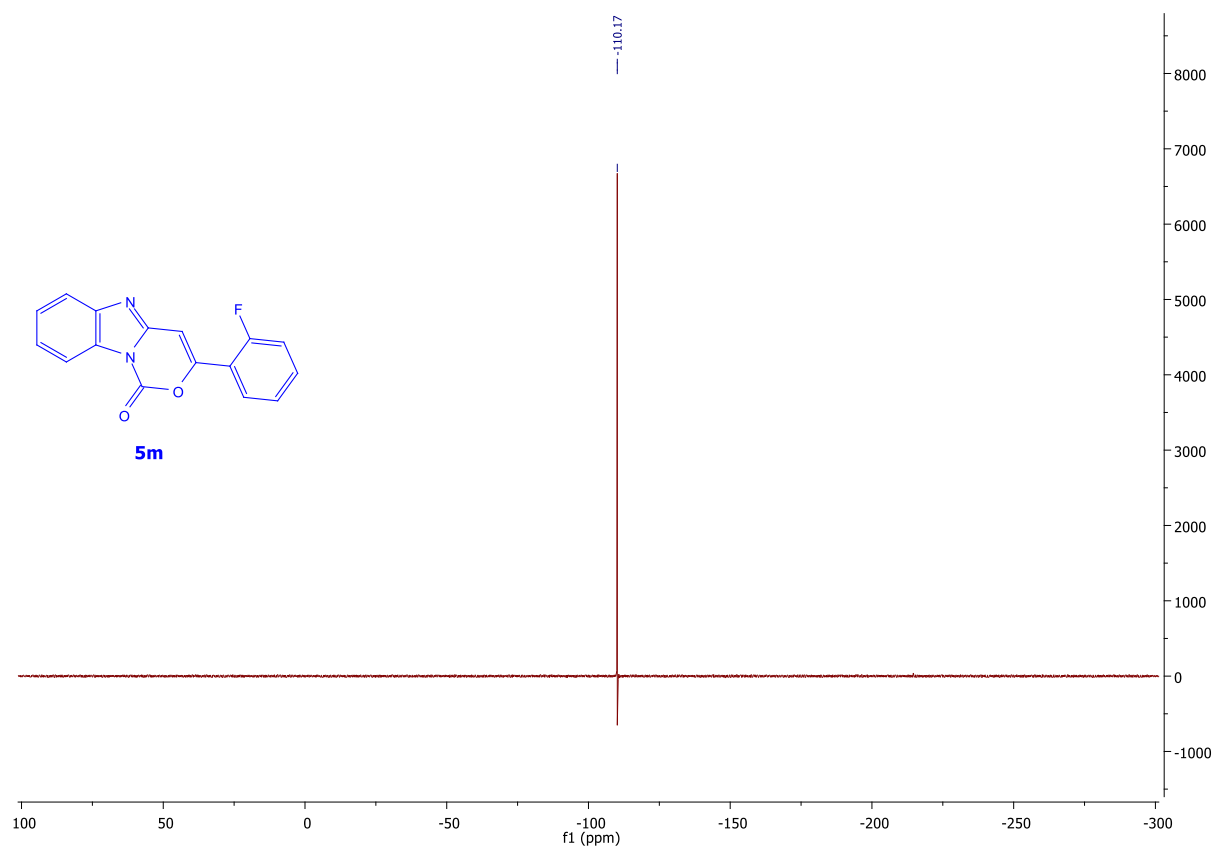

$^{13}\text{C}$  NMR (75 MHz,  $\text{CDCl}_3$ ) of **5m**

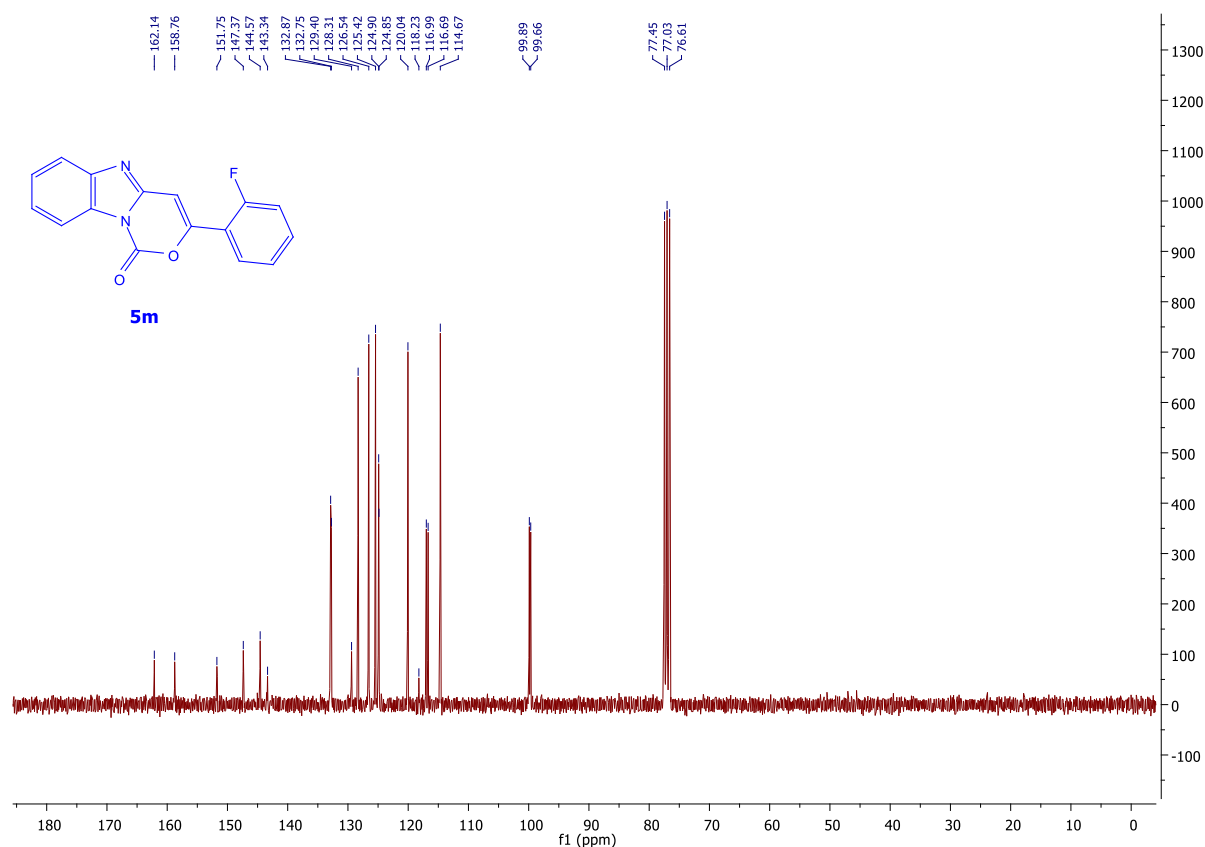

$^1\text{H}$  NMR (300 MHz,  $\text{CDCl}_3$ ) of **5n**

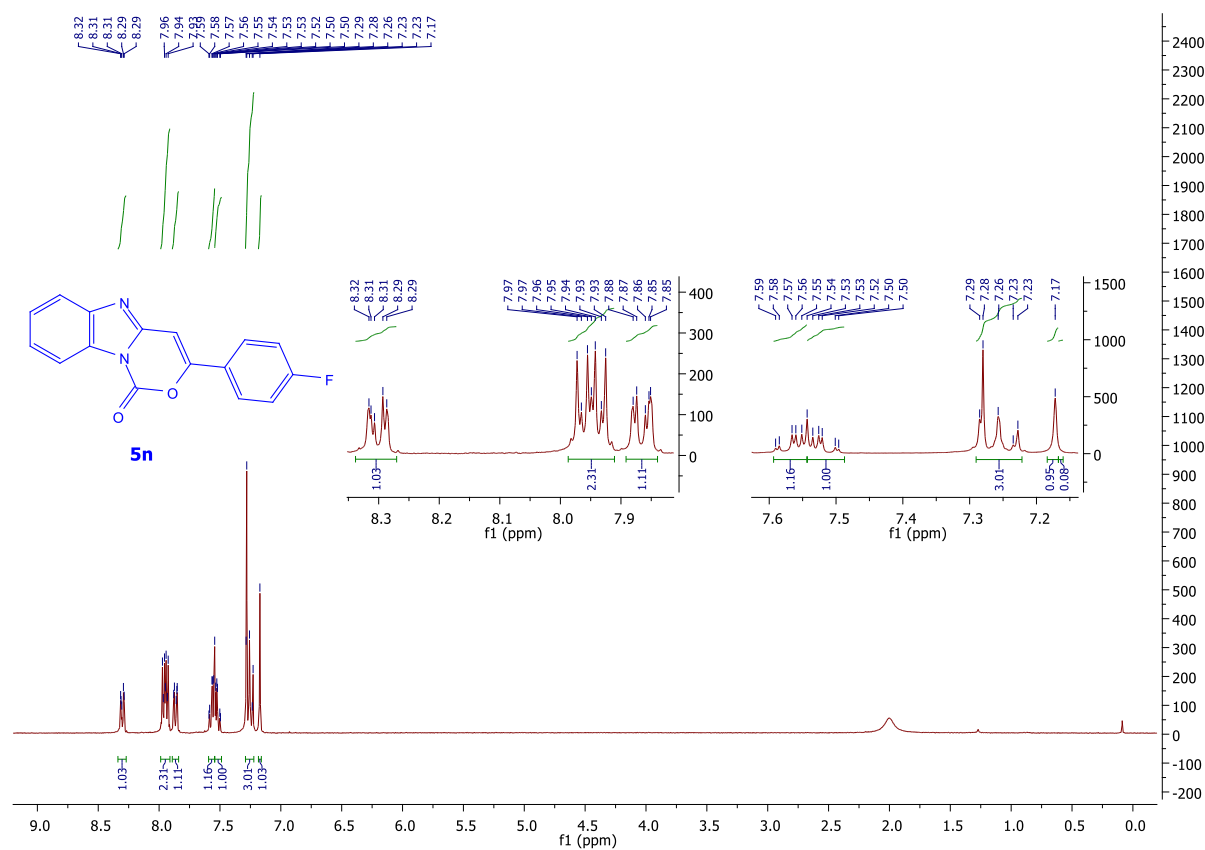

$^{19}\text{F}$  NMR (282 MHz,  $\text{CDCl}_3$ ) of **5n**

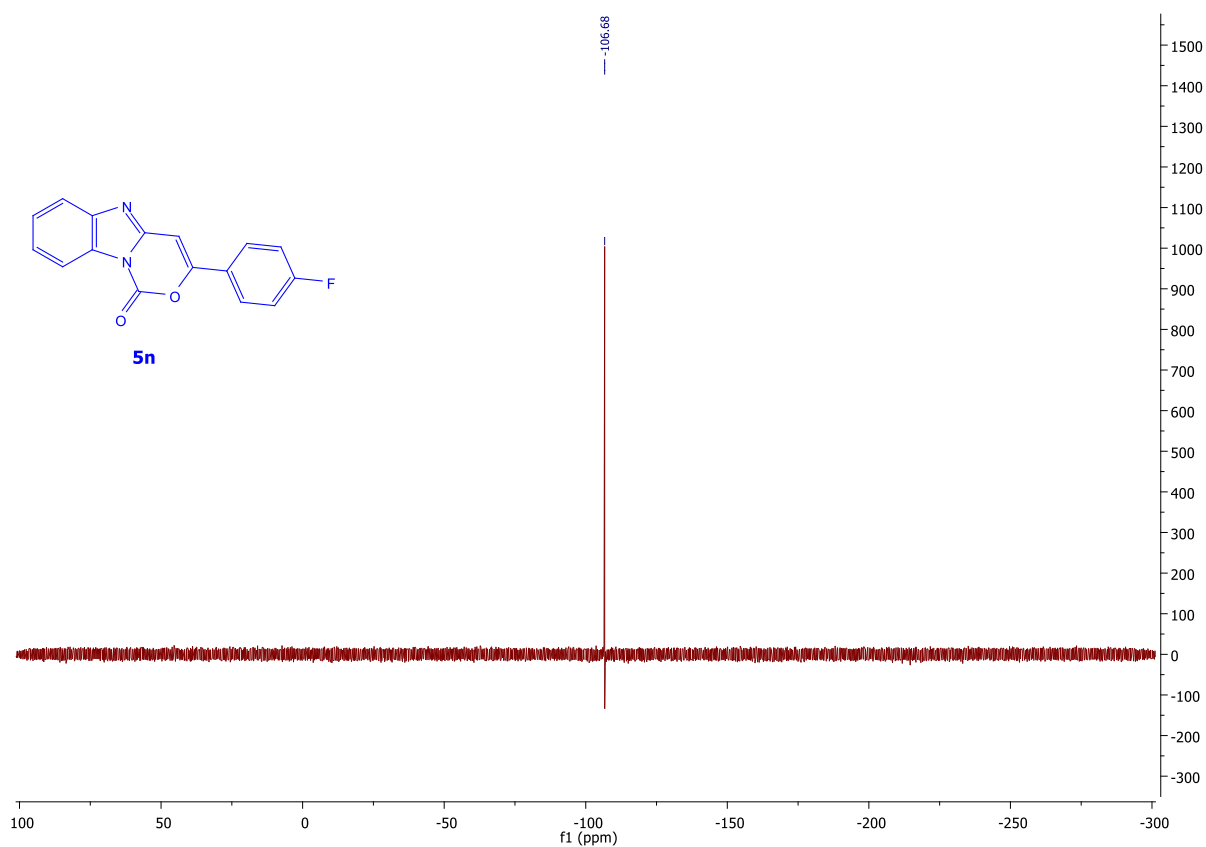

$^{13}\text{C}$  NMR (75 MHz,  $\text{DMSO}-d_6$ ) of **5n**

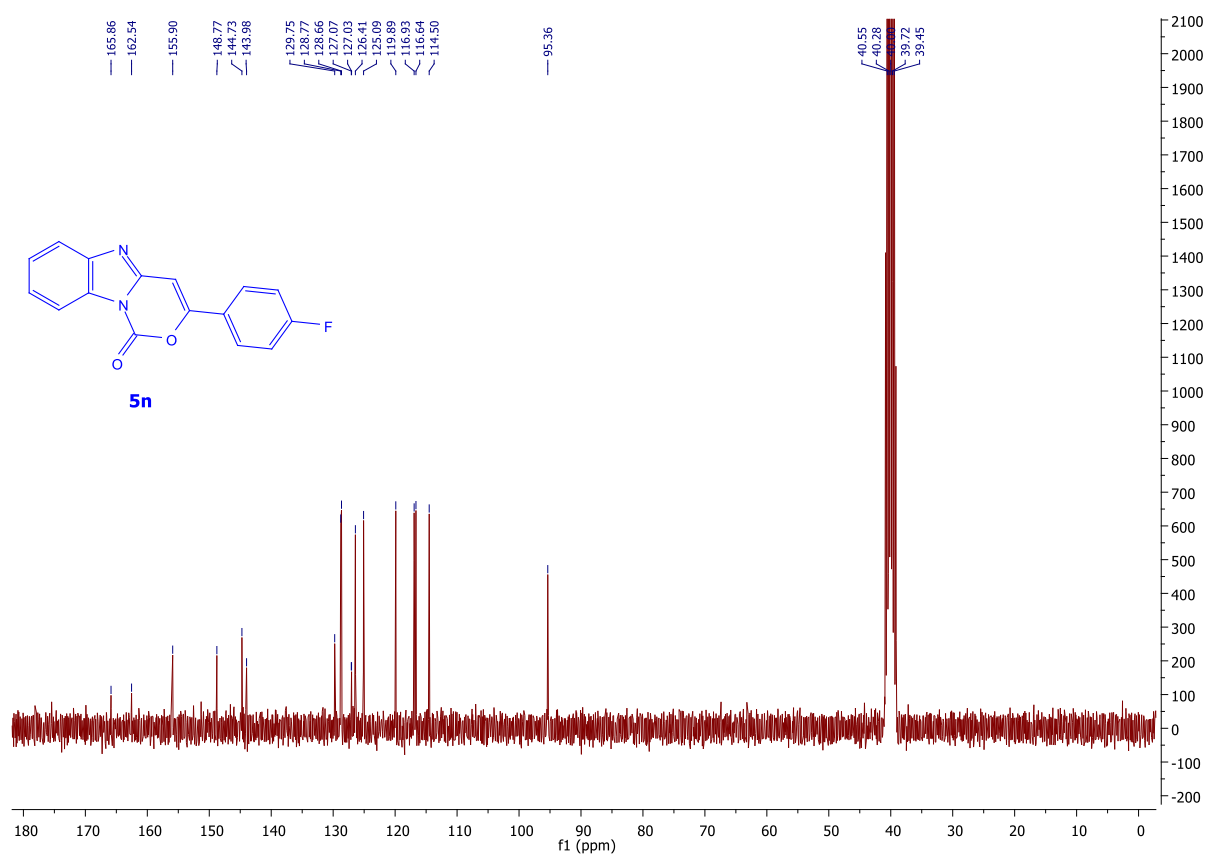



$^1\text{H}$  NMR (300 MHz,  $\text{CDCl}_3$ ) of **5o**

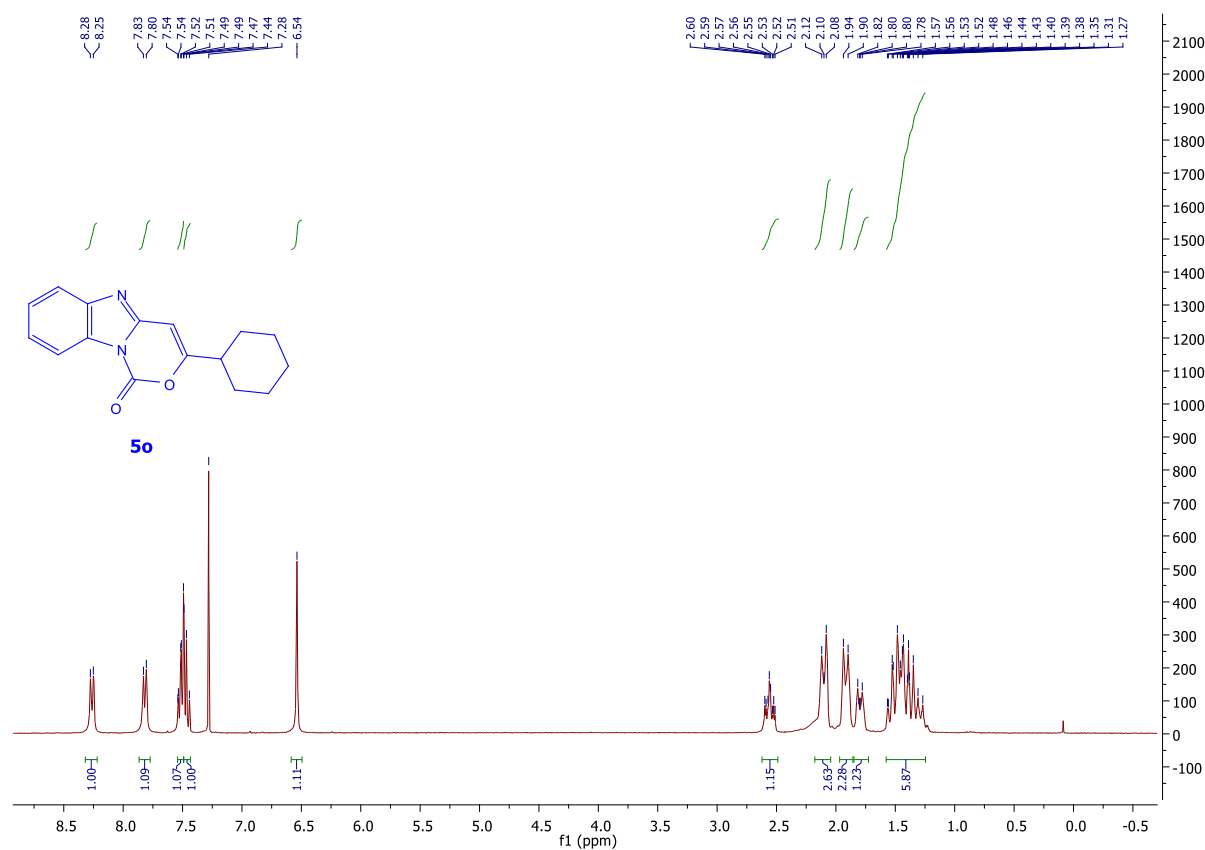

$^{13}\text{C}$  NMR (75 MHz,  $\text{CDCl}_3$ ) of **5o**

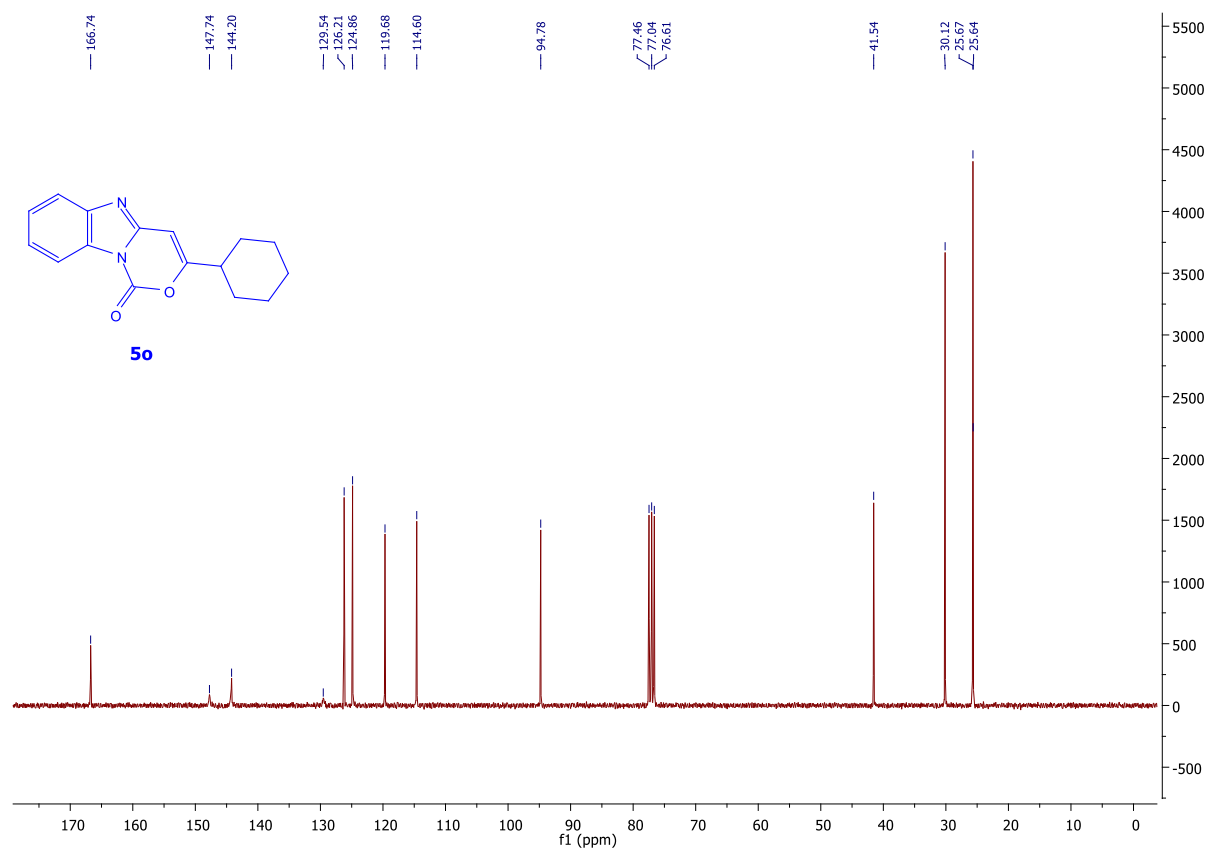

## 2. Details of DFT calculations

The structure of each studied species was optimized by using the Turbomole 7.4 program package.[1] Before their visualization using TmoleX (version 4.5.3), the structure of each individual species was optimized in the gas phase, with a convergence criterion of  $10^{-8}$  Hartree, using the hybrid functional B3LYP and the triplet- $\zeta$  basis set 6-311+G\*,[2] to collect its more stable 3D conformer. The stability of each structure was then investigated during further DFT calculations. During this step, the energy of each species was then minimized again using DFT calculations combining the Resolution of Identity (RI) approximation,[3,4] within the Turbomole 7.4 program package using the B3LYP function with the def2-TZVP basis set.[5–7] All minimum energy structures were obtained with full optimization, without constraints. Corrections for long range non-bonding interactions were given using the Grimme D3 dispersion model.[8] An implicit solvent model was additionally undertaken, using the COSMO Model implemented in Turbomole to determine thermodynamic and charge population properties in DCE. Analytical frequencies were then run on each structure at 1 atm and 298.15 K to calculate finally each energy.

### 2.1. Cartesian coordinates of the molecule 4a

|   | x         | y         | z         |
|---|-----------|-----------|-----------|
| C | 4.091520  | 1.523016  | 0.754366  |
| C | 2.956604  | 0.792659  | 0.407099  |
| C | 2.988477  | -0.110663 | -0.671854 |
| C | 4.137255  | -0.312627 | -1.428727 |
| C | 5.260214  | 0.424315  | -1.068024 |
| C | 5.241390  | 1.327762  | 0.004462  |
| N | 1.695647  | -0.655372 | -0.729930 |
| C | 0.966147  | -0.038203 | 0.325675  |
| N | 1.701268  | 0.809746  | 0.993133  |
| C | -0.385864 | -0.303908 | 0.625094  |
| C | -1.534063 | -0.480419 | 0.940105  |
| C | -2.935651 | -0.689389 | 1.261382  |
| C | -3.884481 | 0.135883  | 0.373102  |
| C | -5.354845 | -0.105450 | 0.709541  |
| H | 4.057884  | 2.215499  | 1.584911  |
| H | 4.151533  | -1.006951 | -2.253229 |
| H | 6.174151  | 0.294175  | -1.633919 |
| H | 6.140369  | 1.879924  | 0.247977  |
| H | -3.108204 | -0.437213 | 2.312810  |
| H | -3.173066 | -1.753770 | 1.155229  |
| H | -3.644485 | 1.196516  | 0.486554  |
| H | -3.697496 | -0.113713 | -0.675298 |
| H | -5.529843 | 0.143055  | 1.761746  |
| H | -5.578496 | -1.172788 | 0.605694  |
| O | 0.021447  | -1.944073 | -1.497134 |
| C | -0.654648 | -2.927201 | -2.373961 |
| C | 0.037946  | -4.281244 | -2.262373 |
| C | -0.687234 | -2.400891 | -3.805087 |
| C | -2.056105 | -2.978844 | -1.777459 |

|   |           |           |           |
|---|-----------|-----------|-----------|
| C | 1.290810  | -1.608549 | -1.680621 |
| O | 2.042781  | -2.027959 | -2.526666 |
| H | 1.038465  | -4.251408 | -2.686662 |
| H | 0.102041  | -4.589000 | -1.217204 |
| H | -0.549126 | -5.027333 | -2.801422 |
| H | 0.310307  | -2.360690 | -4.236651 |
| H | -1.305354 | -3.062397 | -4.415017 |
| H | -1.128249 | -1.402949 | -3.830747 |
| H | -2.670218 | -3.682707 | -2.340678 |
| H | -2.524495 | -1.995276 | -1.816677 |
| H | -2.015309 | -3.302448 | -0.737212 |
| C | -6.302915 | 0.704828  | -0.172705 |
| H | -6.173142 | 0.449533  | -1.227702 |
| H | -7.346494 | 0.518840  | 0.089107  |
| H | -6.118265 | 1.776906  | -0.066648 |

## 2.2. Cartesian coordinates of the molecule 4b

|   | x         | y         | z         |
|---|-----------|-----------|-----------|
| C | 4.075269  | 1.367095  | 0.919766  |
| C | 2.929473  | 0.687216  | 0.509631  |
| C | 2.947603  | -0.116076 | -0.646577 |
| C | 4.093579  | -0.266862 | -1.419865 |
| C | 5.226831  | 0.418042  | -0.995557 |
| C | 5.221424  | 1.222759  | 0.153565  |
| N | 1.646922  | -0.632345 | -0.752978 |
| C | 0.927960  | -0.103106 | 0.353976  |
| N | 1.675535  | 0.669086  | 1.096837  |
| C | -0.428476 | -0.365457 | 0.629550  |
| C | -1.581964 | -0.528925 | 0.942842  |
| H | 4.051792  | 1.983114  | 1.808790  |
| H | 4.098391  | -0.886921 | -2.301665 |
| H | 6.138998  | 0.325566  | -1.571547 |
| H | 6.128677  | 1.737395  | 0.443869  |
| O | -0.035812 | -1.856035 | -1.603794 |
| C | -0.694243 | -2.843695 | -2.494679 |
| C | -0.001318 | -4.194938 | -2.357384 |
| C | -0.691573 | -2.324895 | -3.928679 |
| C | -2.108533 | -2.893207 | -1.932408 |
| C | 1.240824  | -1.534632 | -1.753614 |
| O | 2.000732  | -1.926525 | -2.605276 |
| H | 1.012138  | -4.164290 | -2.750185 |
| H | 0.028919  | -4.500623 | -1.310117 |
| H | -0.568523 | -4.943615 | -2.913650 |
| H | 0.314289  | -2.295399 | -4.340989 |
| H | -1.304421 | -2.984161 | -4.546385 |
| H | -1.123464 | -1.323425 | -3.968796 |

|   |           |           |           |
|---|-----------|-----------|-----------|
| H | -2.701170 | -3.617096 | -2.493294 |
| H | -2.586626 | -1.917371 | -2.010429 |
| H | -2.097183 | -3.185379 | -0.882671 |
| C | -2.940861 | -0.748595 | 1.291583  |
| C | -3.281598 | -1.186030 | 2.580879  |
| C | -4.609247 | -1.412275 | 2.913404  |
| C | -5.614505 | -1.203877 | 1.973122  |
| C | -5.286016 | -0.763724 | 0.693960  |
| C | -3.961180 | -0.536268 | 0.351871  |
| H | -2.496726 | -1.344722 | 3.308641  |
| H | -4.861219 | -1.751067 | 3.910586  |
| H | -6.649620 | -1.380983 | 2.236979  |
| H | -6.065546 | -0.594592 | -0.038549 |
| H | -3.701968 | -0.186293 | -0.638336 |

### 2.3. Cartesian coordinates of the molecule 4c

|   | x         | y         | z         |
|---|-----------|-----------|-----------|
| C | 4.119786  | 1.350593  | 0.872779  |
| C | 2.962328  | 0.690994  | 0.462349  |
| C | 2.982946  | -0.161817 | -0.657593 |
| C | 4.141786  | -0.382167 | -1.393691 |
| C | 5.286856  | 0.283345  | -0.969483 |
| C | 5.279542  | 1.136375  | 0.143936  |
| N | 1.667442  | -0.636005 | -0.779540 |
| C | 0.937946  | -0.037207 | 0.285362  |
| N | 1.694130  | 0.739832  | 1.015709  |
| C | -0.425937 | -0.260904 | 0.552505  |
| C | -1.582916 | -0.378359 | 0.876782  |
| H | 4.094779  | 2.005273  | 1.733726  |
| H | 4.148686  | -1.042494 | -2.245785 |
| H | 6.209634  | 0.135532  | -1.516332 |
| H | 6.195890  | 1.633549  | 0.436276  |
| O | -0.048676 | -1.773550 | -1.683548 |
| C | -0.709918 | -2.797353 | -2.529839 |
| C | -0.136329 | -4.172145 | -2.204618 |
| C | -0.557554 | -2.430695 | -4.002194 |
| C | -2.163010 | -2.691754 | -2.088365 |
| C | 1.258742  | -1.565921 | -1.751651 |
| O | 2.040690  | -2.070087 | -2.520731 |
| H | 0.904090  | -4.252605 | -2.511524 |
| H | -0.210682 | -4.369382 | -1.133847 |
| H | -0.714336 | -4.933214 | -2.732089 |
| H | 0.475596  | -2.516140 | -4.329529 |
| H | -1.173593 | -3.104169 | -4.601402 |
| H | -0.903067 | -1.410029 | -4.176070 |
| H | -2.764998 | -3.426092 | -2.625226 |

|   |           |           |           |
|---|-----------|-----------|-----------|
| H | -2.553809 | -1.697531 | -2.305044 |
| H | -2.257323 | -2.873476 | -1.018093 |
| C | -2.940168 | -0.536910 | 1.254563  |
| C | -3.288268 | -0.748521 | 2.594018  |
| C | -4.613103 | -0.915181 | 2.974963  |
| C | -5.622539 | -0.867096 | 2.011268  |
| C | -5.289485 | -0.648962 | 0.669770  |
| C | -3.971017 | -0.486175 | 0.298256  |
| H | -2.507436 | -0.783897 | 3.342277  |
| H | -4.844604 | -1.078464 | 4.017325  |
| H | -6.086316 | -0.607648 | -0.061118 |
| H | -3.720957 | -0.309521 | -0.738720 |
| C | -7.349291 | -1.227141 | 3.623453  |
| O | -6.947053 | -1.017891 | 2.275567  |
| H | -8.432766 | -1.312932 | 3.599424  |
| H | -7.065498 | -0.382841 | 4.258725  |
| H | -6.920570 | -2.148675 | 4.028213  |

#### 2.4. Cartesian coordinates of the molecule 4d

|   | x         | y         | z         |
|---|-----------|-----------|-----------|
| C | 4.074175  | 1.372341  | 0.921998  |
| C | 2.927906  | 0.693990  | 0.510767  |
| C | 2.943858  | -0.102256 | -0.650351 |
| C | 4.088011  | -0.247411 | -1.427350 |
| C | 5.221832  | 0.435965  | -1.001892 |
| C | 5.218578  | 1.233739  | 0.151995  |
| N | 1.644094  | -0.621196 | -0.755062 |
| C | 0.927019  | -0.098664 | 0.356613  |
| N | 1.675501  | 0.671142  | 1.101156  |
| C | -0.430483 | -0.358139 | 0.628634  |
| C | -1.586356 | -0.518546 | 0.934933  |
| H | 4.052462  | 1.982939  | 1.814815  |
| H | 4.090677  | -0.861181 | -2.313554 |
| H | 6.132481  | 0.348105  | -1.581007 |
| H | 6.126038  | 1.747613  | 0.443052  |
| O | -0.026867 | -1.876307 | -1.582425 |
| C | -0.683991 | -2.864343 | -2.473325 |
| C | 0.038848  | -4.203124 | -2.369802 |
| C | -0.721640 | -2.325837 | -3.899655 |
| C | -2.084895 | -2.950652 | -1.882444 |
| C | 1.238444  | -1.523679 | -1.755639 |
| O | 1.989996  | -1.891751 | -2.625310 |
| H | 1.042974  | -4.146418 | -2.783194 |
| H | 0.097388  | -4.522116 | -1.327731 |
| H | -0.525020 | -4.955513 | -2.924415 |
| H | 0.274844  | -2.269047 | -4.331405 |

|   |           |           |           |
|---|-----------|-----------|-----------|
| H | -1.332623 | -2.989677 | -4.514271 |
| H | -1.175672 | -1.333557 | -3.916831 |
| H | -2.674240 | -3.679105 | -2.440941 |
| H | -2.584609 | -1.984287 | -1.935597 |
| H | -2.045016 | -3.257038 | -0.837353 |
| C | -2.948026 | -0.735925 | 1.274583  |
| C | -3.293564 | -1.170845 | 2.563060  |
| C | -4.619366 | -1.401369 | 2.915351  |
| C | -5.612163 | -1.181565 | 1.956553  |
| C | -5.284721 | -0.744928 | 0.677908  |
| C | -3.960934 | -0.521063 | 0.329806  |
| H | -2.505733 | -1.326218 | 3.289761  |
| H | -6.651013 | -1.349592 | 2.216944  |
| H | -6.067875 | -0.572369 | -0.050133 |
| H | -3.700478 | -0.170346 | -0.659616 |
| C | -4.975473 | -1.899002 | 4.291725  |
| H | -4.182259 | -1.685024 | 5.008807  |
| H | -5.895954 | -1.437549 | 4.653587  |
| H | -5.132936 | -2.981559 | 4.285041  |

2.5. Cartesian coordinates of the molecule 4e

|   | x         | y         | z         |
|---|-----------|-----------|-----------|
| C | 4.058620  | 1.383565  | 0.912879  |
| C | 2.916792  | 0.698344  | 0.500550  |
| C | 2.948653  | -0.125789 | -0.640494 |
| C | 4.103876  | -0.291877 | -1.396509 |
| C | 5.233096  | 0.398565  | -0.970226 |
| C | 5.214389  | 1.223533  | 0.164236  |
| N | 1.646861  | -0.636536 | -0.758358 |
| C | 0.914224  | -0.087764 | 0.330348  |
| N | 1.655143  | 0.693253  | 1.071195  |
| C | -0.439582 | -0.361020 | 0.606184  |
| C | -1.589093 | -0.533554 | 0.930475  |
| H | 4.024954  | 2.015749  | 1.790156  |
| H | 4.119850  | -0.930724 | -2.264728 |
| H | 6.152673  | 0.293314  | -1.532089 |
| H | 6.118900  | 1.741497  | 0.457258  |
| O | -0.050546 | -1.788369 | -1.678613 |
| C | -0.699186 | -2.799801 | -2.549691 |
| C | -0.094688 | -4.171399 | -2.271233 |
| C | -0.567478 | -2.385362 | -4.011231 |
| C | -2.149884 | -2.737101 | -2.092269 |
| C | 1.250990  | -1.549766 | -1.752244 |
| O | 2.037499  | -2.014327 | -2.541041 |
| H | 0.944602  | -4.220647 | -2.588262 |
| H | -0.156280 | -4.402990 | -1.206563 |

|   |           |           |           |
|---|-----------|-----------|-----------|
| H | -0.660978 | -4.928000 | -2.817599 |
| H | 0.464101  | -2.439904 | -4.350116 |
| H | -1.175417 | -3.052394 | -4.625666 |
| H | -0.934759 | -1.366991 | -4.150630 |
| H | -2.742602 | -3.463730 | -2.649580 |
| H | -2.562193 | -1.743654 | -2.269259 |
| H | -2.231126 | -2.958120 | -1.028432 |
| C | -2.940536 | -0.761453 | 1.299336  |
| C | -3.269700 | -1.132564 | 2.611921  |
| C | -4.589517 | -1.362429 | 2.965131  |
| C | -5.623583 | -1.230436 | 2.034537  |
| C | -5.291686 | -0.850313 | 0.732447  |
| C | -3.975604 | -0.619125 | 0.364124  |
| H | -2.480514 | -1.235049 | 3.345260  |
| H | -4.823659 | -1.646749 | 3.984749  |
| H | -6.078005 | -0.729310 | -0.003935 |
| H | -3.736968 | -0.316404 | -0.646486 |
| C | -7.050288 | -1.513679 | 2.419966  |
| H | -7.246298 | -1.229017 | 3.454960  |
| H | -7.749420 | -0.974981 | 1.778972  |
| H | -7.273560 | -2.580936 | 2.326796  |

## 2.6. Cartesian coordinates of the molecule 4f

|   | x         | y         | z         |
|---|-----------|-----------|-----------|
| C | 3.932539  | 1.821925  | 0.484632  |
| C | 2.833411  | 1.002294  | 0.230839  |
| C | 2.945391  | -0.091965 | -0.649177 |
| C | 4.136683  | -0.399421 | -1.297033 |
| C | 5.220915  | 0.428793  | -1.031688 |
| C | 5.124157  | 1.521328  | -0.155977 |
| N | 1.667763  | -0.666276 | -0.680834 |
| C | 0.871576  | 0.109875  | 0.198697  |
| N | 1.547788  | 1.090335  | 0.737635  |
| C | -0.463389 | -0.193812 | 0.529663  |
| C | -1.590442 | -0.435062 | 0.882356  |
| H | 3.840064  | 2.660295  | 1.162159  |
| H | 4.212245  | -1.245626 | -1.961352 |
| H | 6.168034  | 0.220137  | -1.513101 |
| H | 5.997322  | 2.136752  | 0.020354  |
| O | -0.012061 | -1.832389 | -1.606265 |
| C | -0.667818 | -2.922472 | -2.374236 |
| C | -0.289872 | -4.268820 | -1.768404 |
| C | -0.285700 | -2.809804 | -3.846032 |
| C | -2.146355 | -2.620693 | -2.166517 |
| C | 1.305382  | -1.740797 | -1.518847 |
| O | 2.132730  | -2.424670 | -2.069180 |

|    |           |           |           |
|----|-----------|-----------|-----------|
| H  | 0.765958  | -4.487929 | -1.911553 |
| H  | -0.520313 | -4.279802 | -0.702435 |
| H  | -0.876663 | -5.052624 | -2.251123 |
| H  | 0.768868  | -3.023711 | -4.002524 |
| H  | -0.877350 | -3.524313 | -4.421392 |
| H  | -0.506295 | -1.808058 | -4.219231 |
| H  | -2.747623 | -3.348818 | -2.713008 |
| H  | -2.389013 | -1.622570 | -2.532278 |
| H  | -2.404711 | -2.677464 | -1.111076 |
| C  | -2.925493 | -0.714275 | 1.261593  |
| C  | -3.333691 | -1.996094 | 1.665179  |
| C  | -4.647966 | -2.258808 | 2.019565  |
| C  | -5.587213 | -1.235327 | 1.981311  |
| C  | -5.208829 | 0.046420  | 1.591607  |
| C  | -3.894950 | 0.303090  | 1.237160  |
| H  | -4.927098 | -3.257232 | 2.326710  |
| H  | -6.612507 | -1.442195 | 2.260160  |
| H  | -5.938400 | 0.845386  | 1.564888  |
| H  | -3.588720 | 1.294932  | 0.932823  |
| Cl | -2.161786 | -3.304556 | 1.741047  |

## 2.7. Cartesian coordinates of the molecule 4g

|   | x         | y         | z         |
|---|-----------|-----------|-----------|
| C | 4.079047  | 1.366391  | 0.919592  |
| C | 2.932364  | 0.687790  | 0.509438  |
| C | 2.948098  | -0.112878 | -0.648771 |
| C | 4.092760  | -0.262591 | -1.424345 |
| C | 5.226634  | 0.420835  | -0.999948 |
| C | 5.223530  | 1.223182  | 0.151112  |
| N | 1.647818  | -0.630170 | -0.753026 |
| C | 0.932058  | -0.103700 | 0.355971  |
| N | 1.679695  | 0.667676  | 1.099169  |
| C | -0.425752 | -0.361827 | 0.631251  |
| C | -1.580003 | -0.522016 | 0.941718  |
| H | 4.057374  | 1.979997  | 1.810292  |
| H | 4.095716  | -0.879718 | -2.308208 |
| H | 6.137942  | 0.329324  | -1.577400 |
| H | 6.131512  | 1.736783  | 0.440794  |
| O | -0.031478 | -1.869640 | -1.586556 |
| C | -0.694037 | -2.854500 | -2.478380 |
| C | 0.014215  | -4.200105 | -2.366221 |
| C | -0.718020 | -2.319810 | -3.906294 |
| C | -2.099029 | -2.924147 | -1.895052 |
| C | 1.238701  | -1.531569 | -1.753944 |
| O | 1.991186  | -1.908847 | -2.618208 |
| H | 1.020981  | -4.155312 | -2.774517 |



|    |           |           |           |
|----|-----------|-----------|-----------|
| H  | 0.063868  | -4.516576 | -1.322936 |
| H  | -0.554341 | -4.948416 | -2.921509 |
| H  | 0.281320  | -2.275073 | -4.332811 |
| H  | -1.332504 | -2.978988 | -4.522376 |
| H  | -1.161225 | -1.322747 | -3.929238 |
| H  | -2.693217 | -3.647251 | -2.455212 |
| H  | -2.587740 | -1.952278 | -1.954196 |
| H  | -2.068309 | -3.229431 | -0.849327 |
| C  | -2.941194 | -0.738881 | 1.281833  |
| C  | -3.279116 | -1.199262 | 2.563394  |
| C  | -4.610205 | -1.419482 | 2.873930  |
| C  | -5.622794 | -1.193194 | 1.950185  |
| C  | -5.282536 | -0.731181 | 0.682889  |
| C  | -3.957411 | -0.503207 | 0.344118  |
| H  | -2.505899 | -1.379619 | 3.296303  |
| H  | -6.654029 | -1.373118 | 2.220344  |
| H  | -6.063923 | -0.546039 | -0.043270 |
| H  | -3.695554 | -0.136536 | -0.638699 |
| Cl | -5.028818 | -2.001970 | 4.483271  |

2.8. Cartesian coordinates of the molecule 4h

|   | x         | y         | z         |
|---|-----------|-----------|-----------|
| C | 4.070763  | 1.361151  | 0.927179  |
| C | 2.925848  | 0.681815  | 0.513319  |
| C | 2.945787  | -0.118127 | -0.645260 |
| C | 4.092821  | -0.266118 | -1.417604 |
| C | 5.224921  | 0.418127  | -0.989618 |
| C | 5.217729  | 1.219527  | 0.162004  |
| N | 1.645340  | -0.634137 | -0.755401 |
| C | 0.925293  | -0.108684 | 0.351709  |
| N | 1.671173  | 0.661302  | 1.098596  |
| C | -0.431064 | -0.372262 | 0.627149  |
| C | -1.583673 | -0.533870 | 0.944261  |
| H | 4.045859  | 1.974534  | 1.817956  |
| H | 4.099378  | -0.883813 | -2.301037 |
| H | 6.137927  | 0.327859  | -1.564582 |
| H | 6.124432  | 1.733614  | 0.454856  |
| O | -0.038398 | -1.849536 | -1.616851 |
| C | -0.693372 | -2.839076 | -2.509188 |
| C | -0.006799 | -4.192088 | -2.359548 |
| C | -0.677366 | -2.327117 | -3.945452 |
| C | -2.112399 | -2.880516 | -1.958442 |
| C | 1.241016  | -1.534691 | -1.758630 |
| O | 2.004229  | -1.930058 | -2.605312 |
| H | 1.010098  | -4.166976 | -2.743742 |
| H | 0.013280  | -4.493344 | -1.310754 |

|    |           |           |           |
|----|-----------|-----------|-----------|
| H  | -0.571677 | -4.941232 | -2.917495 |
| H  | 0.331533  | -2.304857 | -4.350586 |
| H  | -1.289132 | -2.986168 | -4.564433 |
| H  | -1.103628 | -1.323585 | -3.993795 |
| H  | -2.702871 | -3.606128 | -2.519230 |
| H  | -2.586267 | -1.903482 | -2.048520 |
| H  | -2.110662 | -3.165791 | -0.906728 |
| C  | -2.940248 | -0.750891 | 1.298833  |
| C  | -3.281396 | -1.158142 | 2.597590  |
| C  | -4.604411 | -1.385192 | 2.943407  |
| C  | -5.597329 | -1.201823 | 1.989137  |
| C  | -5.288872 | -0.791533 | 0.698240  |
| C  | -3.964268 | -0.567036 | 0.357704  |
| H  | -2.499498 | -1.296338 | 3.332336  |
| H  | -4.865739 | -1.701009 | 3.943959  |
| H  | -6.077028 | -0.647869 | -0.027966 |
| H  | -3.713177 | -0.239857 | -0.641943 |
| Cl | -7.277526 | -1.492112 | 2.423766  |

## 2.9. Cartesian coordinates of the molecule 4i

|   | x         | y         | z         |
|---|-----------|-----------|-----------|
| C | 4.068324  | 1.420249  | 0.890798  |
| C | 2.926498  | 0.727372  | 0.490689  |
| C | 2.947754  | -0.090802 | -0.655240 |
| C | 4.093466  | -0.244650 | -1.428557 |
| C | 5.222013  | 0.453341  | -1.014505 |
| C | 5.213450  | 1.273075  | 0.124514  |
| N | 1.651091  | -0.618261 | -0.751997 |
| C | 0.932846  | -0.080496 | 0.348679  |
| N | 1.673974  | 0.707166  | 1.080633  |
| C | -0.423602 | -0.343468 | 0.629112  |
| C | -1.575883 | -0.508137 | 0.943000  |
| H | 4.042400  | 2.046862  | 1.772221  |
| H | 4.101223  | -0.875588 | -2.302593 |
| H | 6.134017  | 0.359666  | -1.590462 |
| H | 6.118077  | 1.796725  | 0.406387  |
| O | -0.023846 | -1.873889 | -1.569447 |
| C | -0.682791 | -2.873862 | -2.447737 |
| C | 0.029155  | -4.215517 | -2.315471 |
| C | -0.707529 | -2.359856 | -3.883080 |
| C | -2.088039 | -2.939080 | -1.864121 |
| C | 1.246042  | -1.535168 | -1.740758 |
| O | 2.000164  | -1.922041 | -2.598696 |
| H | 1.035813  | -4.173720 | -2.724276 |
| H | 0.079717  | -4.516831 | -1.267776 |
| H | -0.536798 | -4.973577 | -2.860042 |

|   |           |           |           |
|---|-----------|-----------|-----------|
| H | 0.291941  | -2.318248 | -4.309529 |
| H | -1.319227 | -3.029869 | -4.490129 |
| H | -1.153731 | -1.364554 | -3.921118 |
| H | -2.680203 | -3.671192 | -2.414465 |
| H | -2.579001 | -1.969055 | -1.937978 |
| H | -2.056467 | -3.230643 | -0.814456 |
| C | -2.936933 | -0.729519 | 1.279533  |
| C | -3.283504 | -1.209337 | 2.548807  |
| C | -4.619130 | -1.428401 | 2.837606  |
| C | -5.632927 | -1.188704 | 1.920174  |
| C | -5.283851 | -0.707505 | 0.664491  |
| C | -3.953435 | -0.478407 | 0.343492  |
| H | -2.527972 | -1.408760 | 3.293589  |
| H | -6.660152 | -1.376042 | 2.195387  |
| H | -6.056377 | -0.507706 | -0.066514 |
| H | -3.684631 | -0.097214 | -0.632286 |
| N | -4.979475 | -1.944015 | 4.181100  |
| O | -4.070182 | -2.148734 | 4.973100  |
| O | -6.165800 | -2.134221 | 4.414057  |

2.10. Cartesian coordinates of the molecule 4j

|   | x         | y         | z         |
|---|-----------|-----------|-----------|
| C | 4.116985  | 1.353315  | 0.879088  |
| C | 2.957949  | 0.689616  | 0.479111  |
| C | 2.957966  | -0.125265 | -0.669399 |
| C | 4.098821  | -0.305098 | -1.444128 |
| C | 5.244915  | 0.364071  | -1.030019 |
| C | 5.257523  | 1.180705  | 0.110927  |
| N | 1.649803  | -0.623997 | -0.763478 |
| C | 0.944985  | -0.071354 | 0.339284  |
| N | 1.706578  | 0.697748  | 1.071276  |
| C | -0.420027 | -0.289660 | 0.610746  |
| C | -1.581098 | -0.409520 | 0.915680  |
| H | 4.107368  | 1.978294  | 1.762074  |
| H | 4.089127  | -0.931840 | -2.321173 |
| H | 6.153289  | 0.250476  | -1.608182 |
| H | 6.174659  | 1.682265  | 0.392755  |
| O | -0.029061 | -1.904878 | -1.532936 |
| C | -0.703197 | -2.902767 | -2.402333 |
| C | 0.029974  | -4.236497 | -2.308014 |
| C | -0.778613 | -2.372773 | -3.830157 |
| C | -2.088515 | -2.993262 | -1.776652 |
| C | 1.227892  | -1.543192 | -1.743251 |
| O | 1.962351  | -1.916299 | -2.624596 |
| H | 1.023285  | -4.176864 | -2.746325 |
| H | 0.115717  | -4.548825 | -1.265832 |

|   |           |           |           |
|---|-----------|-----------|-----------|
| H | -0.542918 | -4.995407 | -2.844066 |
| H | 0.206510  | -2.313530 | -4.286818 |
| H | -1.400816 | -3.043577 | -4.425529 |
| H | -1.238652 | -1.383168 | -3.842484 |
| H | -2.685900 | -3.731331 | -2.313322 |
| H | -2.597124 | -2.031600 | -1.827910 |
| H | -2.020718 | -3.290098 | -0.730085 |
| C | -2.947819 | -0.581083 | 1.252908  |
| C | -3.318745 | -0.932161 | 2.560684  |
| C | -4.652131 | -1.115688 | 2.884588  |
| C | -5.641894 | -0.950781 | 1.912317  |
| C | -5.278971 | -0.593543 | 0.611624  |
| C | -3.948724 | -0.408885 | 0.282734  |
| H | -2.550150 | -1.059021 | 3.311288  |
| H | -4.934306 | -1.388078 | 3.891517  |
| H | -6.056953 | -0.463327 | -0.128652 |
| H | -3.667740 | -0.123158 | -0.721810 |
| O | -7.310621 | -1.470062 | 3.496761  |
| C | -7.086859 | -1.140062 | 2.207561  |
| O | -7.972365 | -1.015837 | 1.392892  |
| C | -8.687590 | -1.669731 | 3.859913  |
| H | -8.674630 | -1.921318 | 4.916726  |
| H | -9.262518 | -0.760131 | 3.687846  |
| H | -9.121553 | -2.481388 | 3.276320  |

### 2.11. Cartesian coordinates of the molecule 4k

|   | x         | y         | z         |
|---|-----------|-----------|-----------|
| C | 1.293667  | 0.427785  | 2.268154  |
| C | 0.175244  | -0.308555 | 1.880241  |
| C | 0.244620  | -1.195324 | 0.788839  |
| C | 1.414489  | -1.374600 | 0.059050  |
| C | 2.520054  | -0.632974 | 0.460753  |
| C | 2.464118  | 0.254417  | 1.545905  |
| N | -1.042590 | -1.744747 | 0.682562  |
| C | -1.804582 | -1.153956 | 1.727303  |
| N | -1.094140 | -0.312662 | 2.432382  |
| C | -3.150802 | -1.449218 | 2.014541  |
| C | -4.291522 | -1.615966 | 2.372169  |
| H | 1.231277  | 1.107947  | 3.107089  |
| H | 1.459211  | -2.060983 | -0.771042 |
| H | 3.450399  | -0.747055 | -0.081273 |
| H | 3.351268  | 0.810644  | 1.821299  |
| O | -2.702810 | -2.971128 | -0.207596 |
| C | -3.317149 | -4.027910 | -1.049167 |
| C | -2.698893 | -5.377630 | -0.702251 |
| C | -3.162255 | -3.672029 | -2.523911 |

|   |           |           |           |
|---|-----------|-----------|-----------|
| C | -4.777566 | -3.968255 | -0.623733 |
| C | -1.403955 | -2.712934 | -0.270652 |
| O | -0.596008 | -3.201422 | -1.022242 |
| H | -1.653498 | -5.424664 | -0.998818 |
| H | -2.776224 | -5.565271 | 0.370022  |
| H | -3.244544 | -6.164782 | -1.225994 |
| H | -2.123346 | -3.723991 | -2.839565 |
| H | -3.746955 | -4.374015 | -3.121696 |
| H | -3.542268 | -2.666477 | -2.713268 |
| H | -5.350045 | -4.722189 | -1.165597 |
| H | -5.195598 | -2.986205 | -0.847071 |
| H | -4.876165 | -4.152789 | 0.445779  |
| S | -7.701246 | -2.087451 | 4.306449  |
| C | -7.909822 | -2.214157 | 2.581947  |
| C | -6.736121 | -2.052497 | 1.918618  |
| C | -5.623217 | -1.819115 | 2.798614  |
| C | -6.005196 | -1.809697 | 4.120475  |
| H | -8.889451 | -2.394959 | 2.170526  |
| H | -6.641501 | -2.085199 | 0.844240  |
| H | -5.374104 | -1.654636 | 4.979846  |

2.12. Cartesian coordinates of the molecule 4l

|   | x         | y         | z         |
|---|-----------|-----------|-----------|
| C | 1.183627  | -0.028749 | 2.532911  |
| C | 0.025350  | -0.665759 | 2.086653  |
| C | 0.007181  | -1.325994 | 0.841367  |
| C | 1.123728  | -1.373465 | 0.013649  |
| C | 2.267151  | -0.732768 | 0.475098  |
| C | 2.299757  | -0.070476 | 1.713102  |
| N | -1.281072 | -1.860722 | 0.731773  |
| C | -1.966215 | -1.470234 | 1.907193  |
| N | -1.206053 | -0.766824 | 2.708487  |
| C | -3.332691 | -1.708055 | 2.142938  |
| C | -4.506763 | -1.834004 | 2.386064  |
| H | 1.191903  | 0.476482  | 3.489493  |
| H | 1.092865  | -1.871382 | -0.942616 |
| H | 3.156841  | -0.741787 | -0.141818 |
| H | 3.214426  | 0.415581  | 2.028183  |
| O | -2.800424 | -3.338237 | -0.002021 |
| C | -3.557800 | -4.155991 | -0.989427 |
| C | -2.664681 | -5.270457 | -1.524272 |
| C | -4.084417 | -3.241783 | -2.089108 |
| C | -4.694647 | -4.716315 | -0.146558 |
| C | -1.721033 | -2.658397 | -0.347481 |
| O | -1.128385 | -2.684370 | -1.397697 |
| H | -1.854558 | -4.879319 | -2.135018 |

|   |           |           |           |
|---|-----------|-----------|-----------|
| H | -2.243414 | -5.846508 | -0.698488 |
| H | -3.270236 | -5.944670 | -2.132898 |
| H | -3.274304 | -2.825637 | -2.684848 |
| H | -4.737484 | -3.817515 | -2.747493 |
| H | -4.669958 | -2.430129 | -1.654528 |
| H | -5.320230 | -5.359429 | -0.768283 |
| H | -5.310803 | -3.917202 | 0.264610  |
| H | -4.298802 | -5.312740 | 0.676971  |
| C | -5.889596 | -1.971708 | 2.689596  |
| C | -6.369151 | -1.609230 | 3.956454  |
| C | -7.721885 | -1.750302 | 4.221344  |
| C | -8.554394 | -2.243696 | 3.223802  |
| C | -7.988225 | -2.576828 | 1.996314  |
| N | -6.692975 | -2.450440 | 1.720100  |
| H | -5.682293 | -1.227792 | 4.699479  |
| H | -8.119963 | -1.478491 | 5.190945  |
| H | -9.616643 | -2.369147 | 3.387333  |
| H | -8.606885 | -2.964745 | 1.193690  |

2.13. Cartesian coordinates of the molecule 4m

|   | x         | y         | z         |
|---|-----------|-----------|-----------|
| C | 4.144966  | 1.160227  | 1.047838  |
| C | 2.973233  | 0.543506  | 0.609677  |
| C | 2.934624  | -0.113006 | -0.636566 |
| C | 4.043060  | -0.177043 | -1.473425 |
| C | 5.200970  | 0.443685  | -1.019929 |
| C | 5.254023  | 1.102364  | 0.218766  |
| N | 1.636379  | -0.627761 | -0.736246 |
| C | 0.966792  | -0.227041 | 0.445628  |
| N | 1.744251  | 0.461457  | 1.241375  |
| C | -0.404188 | -0.439359 | 0.684799  |
| C | -1.580800 | -0.538283 | 0.928857  |
| H | 4.169104  | 1.663328  | 2.005283  |
| H | 3.996376  | -0.672335 | -2.430491 |
| H | 6.085213  | 0.421781  | -1.644308 |
| H | 6.178786  | 1.573035  | 0.527696  |
| O | 0.117731  | -2.128775 | -1.425330 |
| C | -0.628153 | -2.984166 | -2.385363 |
| C | 0.279600  | -4.097114 | -2.898686 |
| C | -1.183994 | -2.111165 | -3.504104 |
| C | -1.744767 | -3.548969 | -1.517203 |
| C | 1.188142  | -1.443743 | -1.795677 |
| O | 1.765910  | -1.485638 | -2.853491 |
| H | 1.074503  | -3.707327 | -3.529722 |
| H | 0.722223  | -4.641022 | -2.062345 |
| H | -0.319124 | -4.799803 | -3.481368 |

|   |           |           |           |
|---|-----------|-----------|-----------|
| H | -0.386407 | -1.696656 | -4.117417 |
| H | -1.830559 | -2.717347 | -4.141281 |
| H | -1.780752 | -1.298856 | -3.087159 |
| H | -2.366128 | -4.218827 | -2.113304 |
| H | -2.369206 | -2.747987 | -1.128298 |
| H | -1.330874 | -4.110542 | -0.679005 |
| C | -2.960697 | -0.663322 | 1.215647  |
| C | -3.429470 | -0.794065 | 2.534218  |
| C | -4.784163 | -0.919421 | 2.798667  |
| C | -5.705167 | -0.915125 | 1.753715  |
| C | -5.270049 | -0.782725 | 0.439147  |
| C | -3.917032 | -0.658511 | 0.194092  |
| H | -2.706341 | -0.794602 | 3.338540  |
| H | -5.123778 | -1.019915 | 3.821143  |
| H | -6.763491 | -1.012235 | 1.958655  |
| H | -5.961449 | -0.770867 | -0.392749 |
| F | -3.499847 | -0.525408 | -1.084245 |

2.14. Cartesian coordinates of the molecule 4n

|   | x         | y         | z         |
|---|-----------|-----------|-----------|
| C | 4.124816  | 1.274748  | 0.997250  |
| C | 2.962537  | 0.668159  | 0.523139  |
| C | 2.983198  | -0.093237 | -0.661038 |
| C | 4.147003  | -0.272789 | -1.400786 |
| C | 5.296424  | 0.338149  | -0.912353 |
| C | 5.289136  | 1.100253  | 0.265625  |
| N | 1.662517  | -0.534578 | -0.834534 |
| C | 0.931833  | -0.014442 | 0.268062  |
| N | 1.689125  | 0.689878  | 1.066681  |
| C | -0.435583 | -0.252753 | 0.509392  |
| C | -1.592967 | -0.410332 | 0.810828  |
| H | 4.099967  | 1.858888  | 1.907483  |
| H | 4.154127  | -0.863998 | -2.302217 |
| H | 6.223479  | 0.219168  | -1.458905 |
| H | 6.209793  | 1.556989  | 0.606188  |
| O | -0.070329 | -1.521347 | -1.873844 |
| C | -0.748816 | -2.436644 | -2.825997 |
| C | -0.239319 | -3.857746 | -2.614462 |
| C | -0.541617 | -1.943778 | -4.253812 |
| C | -2.208107 | -2.310707 | -2.410689 |
| C | 1.245451  | -1.362275 | -1.893107 |
| O | 2.028525  | -1.827845 | -2.684286 |
| H | 0.805064  | -3.954110 | -2.902578 |
| H | -0.351135 | -4.148042 | -1.568359 |
| H | -0.832278 | -4.543078 | -3.222935 |
| H | 0.495882  | -2.042310 | -4.562981 |

|   |           |           |           |
|---|-----------|-----------|-----------|
| H | -1.166954 | -2.533242 | -4.927154 |
| H | -0.841533 | -0.897884 | -4.341136 |
| H | -2.825077 | -2.960110 | -3.033287 |
| H | -2.550723 | -1.283264 | -2.534907 |
| H | -2.340243 | -2.595706 | -1.367342 |
| C | -2.953363 | -0.629088 | 1.151577  |
| C | -3.298589 | -1.098009 | 2.429151  |
| C | -4.623553 | -1.335639 | 2.761221  |
| C | -5.601050 | -1.098068 | 1.809010  |
| C | -5.300538 | -0.625949 | 0.542140  |
| C | -3.973255 | -0.391412 | 0.217216  |
| H | -2.517505 | -1.276341 | 3.155865  |
| H | -4.904440 | -1.699525 | 3.740372  |
| H | -6.097087 | -0.446652 | -0.167463 |
| H | -3.715360 | -0.018250 | -0.763952 |
| F | -6.892492 | -1.333853 | 2.127035  |

2.15. Cartesian coordinates of the molecule 4o

|   | x         | y         | z         |
|---|-----------|-----------|-----------|
| C | 1.222609  | 0.634467  | 2.338269  |
| C | 0.078624  | -0.070334 | 1.968754  |
| C | 0.086051  | -0.903544 | 0.834313  |
| C | 1.218754  | -1.059750 | 0.043241  |
| C | 2.351265  | -0.349469 | 0.427100  |
| C | 2.356681  | 0.484582  | 1.554449  |
| N | -1.209868 | -1.439752 | 0.767157  |
| C | -1.916212 | -0.889596 | 1.874332  |
| N | -1.164723 | -0.088131 | 2.580039  |
| C | -3.261609 | -1.173910 | 2.185482  |
| C | -4.403817 | -1.373010 | 2.510159  |
| H | 1.207947  | 1.273388  | 3.211246  |
| H | 1.214259  | -1.701090 | -0.823264 |
| H | 3.253416  | -0.445657 | -0.163925 |
| H | 3.262139  | 1.018463  | 1.814192  |
| O | -2.911095 | -2.654042 | -0.056763 |
| C | -3.612920 | -3.575118 | -0.978864 |
| C | -2.941211 | -4.944045 | -0.950441 |
| C | -3.651880 | -2.969697 | -2.378323 |
| C | -5.008618 | -3.637270 | -0.369559 |
| C | -1.638907 | -2.327198 | -0.235105 |
| O | -0.903037 | -2.704478 | -1.114598 |
| H | -1.944805 | -4.906309 | -1.383966 |
| H | -2.871060 | -5.309895 | 0.075472  |
| H | -3.545854 | -5.649998 | -1.522991 |
| H | -2.658217 | -2.920944 | -2.817786 |
| H | -4.286715 | -3.586946 | -3.016789 |



|   |           |           |           |
|---|-----------|-----------|-----------|
| H | -4.077209 | -1.965243 | -2.344020 |
| H | -5.642250 | -4.293871 | -0.967292 |
| H | -5.458243 | -2.644536 | -0.342170 |
| H | -4.962565 | -4.024953 | 0.648304  |
| C | -8.193494 | -0.858580 | 2.555812  |
| C | -6.735183 | -0.614211 | 2.163394  |
| C | -5.790416 | -1.601105 | 2.884084  |
| C | -5.987515 | -1.524856 | 4.413039  |
| C | -7.449625 | -1.764339 | 4.794577  |
| C | -8.387349 | -0.793117 | 4.072948  |
| H | -8.503879 | -1.845780 | 2.193904  |
| H | -6.441591 | 0.404793  | 2.433056  |
| H | -6.061528 | -2.614955 | 2.561217  |
| H | -5.669563 | -0.534958 | 4.753607  |
| H | -7.726548 | -2.793195 | 4.536260  |
| H | -8.183323 | 0.227107  | 4.417484  |
| H | -8.836041 | -0.127785 | 2.058012  |
| H | -6.603949 | -0.706104 | 1.082972  |
| H | -5.335387 | -2.251928 | 4.901164  |
| H | -7.567239 | -1.672819 | 5.877422  |
| H | -9.427386 | -1.009548 | 4.330481  |

2.16. Cartesian coordinates of  $\text{Ag}^+$  (charge +1)

|    | x | y | z |
|----|---|---|---|
| Ag | 0 | 0 | 0 |

2.17. Cartesian coordinates of TS1 (charge +1)

|   | x         | y         | z         |
|---|-----------|-----------|-----------|
| C | 3.662499  | 1.593233  | 0.892982  |
| C | 2.583750  | 0.828237  | 0.447794  |
| C | 2.742327  | -0.112656 | -0.588684 |
| C | 3.966630  | -0.322143 | -1.211081 |
| C | 5.029403  | 0.449303  | -0.755684 |
| C | 4.884525  | 1.390811  | 0.276612  |
| N | 1.460031  | -0.670891 | -0.781756 |
| C | 0.630557  | -0.040899 | 0.186502  |
| N | 1.276111  | 0.839290  | 0.896989  |
| H | 3.530279  | 2.310761  | 1.691017  |
| H | 4.092533  | -1.053276 | -1.993015 |
| H | 6.002080  | 0.313446  | -1.210288 |
| H | 5.746631  | 1.962340  | 0.593948  |
| O | -0.131368 | -1.762644 | -2.009155 |
| C | -0.613631 | -2.813227 | -2.980986 |
| C | -0.210898 | -4.190798 | -2.474602 |
| C | -0.090010 | -2.499152 | -4.374493 |
| C | -2.126908 | -2.641733 | -2.917571 |

|    |           |           |           |
|----|-----------|-----------|-----------|
| C  | 1.194757  | -1.631358 | -1.766535 |
| O  | 2.063921  | -2.227642 | -2.335418 |
| H  | 0.865031  | -4.332860 | -2.526146 |
| H  | -0.543543 | -4.336929 | -1.445540 |
| H  | -0.687004 | -4.949563 | -3.097279 |
| H  | 0.985118  | -2.639017 | -4.438015 |
| H  | -0.569191 | -3.168705 | -5.090606 |
| H  | -0.332475 | -1.472839 | -4.657906 |
| H  | -2.618773 | -3.336930 | -3.598092 |
| H  | -2.425766 | -1.637707 | -3.274399 |
| H  | -2.512766 | -2.836994 | -1.914573 |
| C  | -0.731798 | -0.340783 | 0.427389  |
| C  | -1.811597 | -0.575121 | 0.960331  |
| C  | -3.014306 | -0.885989 | 1.643994  |
| C  | -3.567129 | -2.175685 | 1.554937  |
| C  | -4.732284 | -2.472743 | 2.241314  |
| C  | -5.351754 | -1.497284 | 3.020898  |
| C  | -4.804597 | -0.219950 | 3.116965  |
| C  | -3.642526 | 0.094202  | 2.430791  |
| Ag | -2.038452 | -0.198044 | -1.509400 |
| H  | -3.068302 | -2.933682 | 0.964424  |
| H  | -5.156076 | -3.466474 | 2.178430  |
| H  | -6.260316 | -1.735621 | 3.558654  |
| H  | -5.284963 | 0.531309  | 3.729858  |
| H  | -3.207224 | 1.082107  | 2.502537  |

2.18. Cartesian coordinates of  $TSIIa_{endo}$  (charge +1)

|   | x         | y         | z         |
|---|-----------|-----------|-----------|
| C | 3.029894  | 0.064291  | 0.384387  |
| C | 3.302187  | -0.560462 | -0.849603 |
| C | 4.618440  | -0.817103 | -1.218991 |
| C | 5.622499  | -0.439491 | -0.337404 |
| C | 5.330944  | 0.179860  | 0.885466  |
| C | 4.021776  | 0.445845  | 1.273829  |
| N | 2.128094  | -0.840461 | -1.548771 |
| C | 1.141461  | -0.424168 | -0.823682 |
| N | 1.624193  | 0.158201  | 0.417536  |
| C | 0.789775  | 0.647496  | 1.329172  |
| O | -0.492913 | 0.606234  | 1.119616  |
| C | -1.064325 | 0.061039  | -0.101761 |
| C | -0.262835 | -0.458632 | -1.041527 |
| C | -2.518277 | 0.197373  | -0.058938 |
| C | -3.230356 | -0.028912 | 1.124958  |
| C | -4.614678 | 0.067541  | 1.138599  |
| C | -5.305038 | 0.399488  | -0.023209 |
| C | -4.603752 | 0.640438  | -1.201000 |

|    |           |           |           |
|----|-----------|-----------|-----------|
| C  | -3.219781 | 0.543251  | -1.220380 |
| H  | 4.837856  | -1.295220 | -2.163646 |
| H  | 6.655896  | -0.626789 | -0.597911 |
| H  | 6.142000  | 0.458844  | 1.544895  |
| H  | 3.796560  | 0.923027  | 2.215059  |
| Ag | -0.898085 | -1.416820 | -2.817994 |
| H  | -2.703565 | -0.309692 | 2.026799  |
| H  | -5.157262 | -0.124368 | 2.055287  |
| H  | -6.384449 | 0.476394  | -0.009326 |
| H  | -5.135254 | 0.919728  | -2.101584 |
| H  | -2.672383 | 0.769846  | -2.126425 |
| C  | 0.465526  | 1.827287  | 3.536824  |
| C  | -0.384888 | 0.756886  | 4.193670  |
| C  | -0.331132 | 2.977555  | 2.948558  |
| C  | 1.586789  | 2.306550  | 4.439075  |
| H  | -0.845665 | 1.184849  | 5.085173  |
| H  | 0.314187  | 3.646534  | 2.378167  |
| H  | 2.193665  | 1.470556  | 4.786299  |
| H  | -0.755947 | 3.550160  | 3.774482  |
| H  | -1.181525 | 0.410586  | 3.539490  |
| H  | 0.226221  | -0.090601 | 4.505300  |
| H  | 2.225040  | 3.023087  | 3.922286  |
| H  | -1.150185 | 2.637328  | 2.319301  |
| H  | 1.153142  | 2.799772  | 5.309536  |
| O  | 1.274395  | 1.156176  | 2.399288  |

2.19. Cartesian coordinates of  $TSII'a_{endo}$  (charge +1)

|   | x         | y         | z         |
|---|-----------|-----------|-----------|
| C | 2.955389  | 0.057893  | 0.340510  |
| C | 3.204469  | -0.595966 | -0.883291 |
| C | 4.513818  | -0.856049 | -1.274240 |
| C | 5.534531  | -0.452693 | -0.423732 |
| C | 5.265976  | 0.195189  | 0.789588  |
| C | 3.964070  | 0.465223  | 1.199077  |
| N | 2.017146  | -0.897993 | -1.550260 |
| C | 1.044153  | -0.468057 | -0.814784 |
| N | 1.550285  | 0.146767  | 0.401244  |
| C | 0.733048  | 0.655756  | 1.317627  |
| O | -0.553571 | 0.604182  | 1.136314  |
| C | -1.148125 | 0.025829  | -0.058482 |
| C | -0.364299 | -0.513694 | -1.001888 |
| C | -2.601467 | 0.157041  | 0.011928  |
| C | -3.287237 | -0.044790 | 1.215575  |
| C | -4.671323 | 0.046866  | 1.256522  |
| C | -5.387492 | 0.349696  | 0.102408  |
| C | -4.712437 | 0.565841  | -1.095324 |

|    |           |           |           |
|----|-----------|-----------|-----------|
| C  | -3.328812 | 0.473326  | -1.141978 |
| H  | 4.715394  | -1.356309 | -2.211369 |
| H  | 6.563052  | -0.641946 | -0.701525 |
| H  | 6.089473  | 0.493558  | 1.424653  |
| H  | 3.756611  | 0.964290  | 2.133013  |
| Ag | -1.032581 | -1.518582 | -2.739996 |
| H  | -2.740259 | -0.303158 | 2.112079  |
| H  | -5.193582 | -0.126100 | 2.188673  |
| H  | -6.466674 | 0.423087  | 0.137579  |
| H  | -5.264148 | 0.822266  | -1.990529 |
| H  | -2.801623 | 0.680706  | -2.064459 |
| C  | 0.449583  | 1.892494  | 3.499239  |
| C  | -0.388036 | 0.839138  | 4.198995  |
| C  | -0.358571 | 3.027070  | 2.896460  |
| C  | 1.587121  | 2.394598  | 4.368141  |
| H  | -0.830529 | 1.289325  | 5.088784  |
| H  | 0.275926  | 3.682113  | 2.298411  |
| H  | 2.200398  | 1.567623  | 4.725657  |
| H  | -0.769881 | 3.619798  | 3.714972  |
| H  | -1.197813 | 0.477676  | 3.569673  |
| H  | 0.228923  | -0.000922 | 4.519063  |
| H  | 2.215626  | 3.097212  | 3.821289  |
| H  | -1.188005 | 2.670321  | 2.290302  |
| H  | 1.169475  | 2.910287  | 5.233401  |
| O  | 1.237659  | 1.193329  | 2.364161  |

2.20. Cartesian coordinates of  $TSIIb_{exo}$  (charge +1)

|   | x         | y         | z         |
|---|-----------|-----------|-----------|
| C | 3.391689  | -0.319611 | 0.161007  |
| C | 3.319653  | 0.995250  | 0.684490  |
| C | 4.487954  | 1.637192  | 1.073059  |
| C | 5.687149  | 0.946923  | 0.926393  |
| C | 5.732905  | -0.351889 | 0.406836  |
| C | 4.574393  | -1.016746 | 0.010833  |
| N | 1.990329  | 1.461274  | 0.726436  |
| C | 1.280009  | 0.489964  | 0.255191  |
| N | 2.047648  | -0.636086 | -0.112297 |
| C | 1.241577  | -1.582874 | -0.608752 |
| O | -0.008444 | -1.201156 | -0.595521 |
| C | -0.089576 | 0.200655  | -0.033394 |
| C | -1.193641 | 0.933667  | 0.088054  |
| C | -2.564482 | 0.600618  | -0.228735 |
| C | -2.999270 | -0.722973 | -0.449584 |
| C | -4.322419 | -0.992066 | -0.754821 |
| C | -5.245850 | 0.046726  | -0.859641 |
| C | -4.839537 | 1.359311  | -0.641336 |

|    |           |           |           |
|----|-----------|-----------|-----------|
| C  | -3.519693 | 1.628818  | -0.316992 |
| H  | 4.457214  | 2.640438  | 1.475234  |
| H  | 6.611189  | 1.426052  | 1.221876  |
| H  | 6.687195  | -0.851911 | 0.310285  |
| H  | 4.602689  | -2.019900 | -0.390856 |
| Ag | -0.556453 | 2.850465  | 0.891265  |
| H  | -2.297760 | -1.538719 | -0.364734 |
| H  | -4.641603 | -2.014953 | -0.909567 |
| H  | -6.278906 | -0.168667 | -1.100899 |
| H  | -5.554192 | 2.168860  | -0.712770 |
| H  | -3.205381 | 2.649203  | -0.133149 |
| C  | 0.773916  | -3.830385 | -1.620093 |
| C  | 0.059399  | -3.274050 | -2.837132 |
| C  | -0.153401 | -4.293801 | -0.513065 |
| C  | 1.814952  | -4.870742 | -1.980759 |
| H  | -0.458505 | -4.098636 | -3.329609 |
| H  | 0.410706  | -4.588891 | 0.372211  |
| H  | 2.514877  | -4.484166 | -2.721148 |
| H  | -0.698239 | -5.169387 | -0.869983 |
| H  | -0.679959 | -2.520201 | -2.576206 |
| H  | 0.770984  | -2.855451 | -3.549395 |
| H  | 2.367649  | -5.193485 | -1.098878 |
| H  | -0.882851 | -3.533768 | -0.241546 |
| H  | 1.310572  | -5.738855 | -2.406574 |
| O  | 1.674202  | -2.700484 | -1.034344 |

2.21. Cartesian coordinates of  $TSII'b_{exo}$  (charge +1)

|   | x         | y         | z         |
|---|-----------|-----------|-----------|
| C | 3.347991  | -0.280019 | 0.168407  |
| C | 3.267352  | 1.024034  | 0.717039  |
| C | 4.431501  | 1.666317  | 1.117273  |
| C | 5.635264  | 0.987157  | 0.956810  |
| C | 5.689544  | -0.301055 | 0.412342  |
| C | 4.535320  | -0.966012 | 0.004173  |
| N | 1.934928  | 1.480173  | 0.768162  |
| C | 1.230963  | 0.513235  | 0.278449  |
| N | 2.005980  | -0.600155 | -0.110813 |
| C | 1.205750  | -1.543749 | -0.622635 |
| O | -0.046716 | -1.170683 | -0.602057 |
| C | -0.136988 | 0.220310  | -0.013465 |
| C | -1.245513 | 0.943225  | 0.126957  |
| C | -2.615919 | 0.611924  | -0.192671 |
| C | -3.041449 | -0.703586 | -0.473008 |
| C | -4.365059 | -0.969843 | -0.778461 |
| C | -5.298891 | 0.064054  | -0.823461 |
| C | -4.902111 | 1.368307  | -0.546165 |

|    |           |           |           |
|----|-----------|-----------|-----------|
| C  | -3.581176 | 1.634235  | -0.223344 |
| H  | 4.394249  | 2.661503  | 1.538501  |
| H  | 6.556206  | 1.466849  | 1.260937  |
| H  | 6.647151  | -0.792593 | 0.305653  |
| H  | 4.570174  | -1.961008 | -0.416843 |
| Ag | -0.613345 | 2.845572  | 0.970748  |
| H  | -2.332043 | -1.515970 | -0.435943 |
| H  | -4.676565 | -1.986861 | -0.980377 |
| H  | -6.332322 | -0.149140 | -1.065079 |
| H  | -5.624487 | 2.173718  | -0.571723 |
| H  | -3.273753 | 2.647680  | 0.005098  |
| C  | 0.752324  | -3.778317 | -1.668432 |
| C  | 0.032917  | -3.208794 | -2.876462 |
| C  | -0.170611 | -4.264531 | -0.567592 |
| C  | 1.799856  | -4.806145 | -2.045746 |
| H  | -0.480711 | -4.029227 | -3.380227 |
| H  | 0.396535  | -4.569616 | 0.312335  |
| H  | 2.496403  | -4.403813 | -2.780968 |
| H  | -0.710224 | -5.138038 | -0.937285 |
| H  | -0.710586 | -2.463145 | -2.603952 |
| H  | 0.741033  | -2.775524 | -3.583378 |
| H  | 2.355688  | -5.138369 | -1.169399 |
| H  | -0.904613 | -3.513589 | -0.283197 |
| H  | 1.300844  | -5.671119 | -2.484075 |
| O  | 1.645579  | -2.651231 | -1.067006 |

2.22. Cartesian coordinates of the species  $la_{endo}$

|   | x         | y         | z         |
|---|-----------|-----------|-----------|
| C | 2.810065  | 0.138288  | 0.489350  |
| C | 3.074663  | -0.028864 | -0.887678 |
| C | 4.393619  | -0.054222 | -1.337842 |
| C | 5.404447  | 0.087020  | -0.396858 |
| C | 5.119184  | 0.251499  | 0.966824  |
| C | 3.810921  | 0.280492  | 1.438856  |
| N | 1.892133  | -0.149698 | -1.609612 |
| C | 0.922500  | -0.057813 | -0.736053 |
| N | 1.415095  | 0.119900  | 0.577529  |
| C | 0.622606  | 0.221662  | 1.703294  |
| O | -0.713739 | 0.172072  | 1.446536  |
| C | -1.264201 | -0.004877 | 0.167281  |
| C | -0.487755 | -0.136013 | -0.924616 |
| C | -2.729782 | -0.051317 | 0.252223  |
| C | -3.354338 | -0.562854 | 1.396597  |
| C | -4.738802 | -0.643350 | 1.466287  |
| C | -5.523628 | -0.201361 | 0.406137  |
| C | -4.912440 | 0.334241  | -0.724020 |

|    |           |           |           |
|----|-----------|-----------|-----------|
| C  | -3.529010 | 0.412282  | -0.798995 |
| O  | 1.033628  | 0.348910  | 2.823365  |
| H  | 4.608807  | -0.180701 | -2.390627 |
| H  | 6.437830  | 0.070340  | -0.719815 |
| H  | 5.935398  | 0.358430  | 1.669868  |
| H  | 3.576435  | 0.406219  | 2.485432  |
| Ag | -1.058523 | -0.568718 | -2.897419 |
| H  | -2.747860 | -0.901483 | 2.224850  |
| H  | -5.206138 | -1.052267 | 2.353503  |
| H  | -6.603216 | -0.260829 | 0.464953  |
| H  | -5.516092 | 0.707332  | -1.542265 |
| H  | -3.059206 | 0.865334  | -1.661947 |

2.23. Cartesian coordinates of the species  $Ib_{exo}$

|    | x         | y         | z         |
|----|-----------|-----------|-----------|
| C  | 3.344634  | -0.346807 | 0.199153  |
| C  | 3.269086  | 1.016880  | 0.593201  |
| C  | 4.435201  | 1.690046  | 0.944817  |
| C  | 5.634051  | 0.988312  | 0.894009  |
| C  | 5.684577  | -0.356595 | 0.502691  |
| C  | 4.533301  | -1.052823 | 0.145714  |
| N  | 1.944764  | 1.476251  | 0.557307  |
| C  | 1.257001  | 0.440156  | 0.161455  |
| N  | 2.020200  | -0.683103 | -0.073276 |
| C  | 1.227747  | -1.754984 | -0.488823 |
| O  | -0.059648 | -1.281661 | -0.513588 |
| C  | -0.113711 | 0.099292  | -0.112609 |
| C  | -1.194318 | 0.881754  | -0.014865 |
| C  | -2.580859 | 0.541659  | -0.287936 |
| C  | -2.987537 | -0.733978 | -0.732380 |
| C  | -4.324772 | -1.006355 | -0.978419 |
| C  | -5.295153 | -0.025285 | -0.791282 |
| C  | -4.915319 | 1.239386  | -0.353414 |
| C  | -3.578723 | 1.514593  | -0.107338 |
| H  | 4.399173  | 2.728101  | 1.247547  |
| H  | 6.553841  | 1.491782  | 1.163452  |
| H  | 6.639167  | -0.866055 | 0.477260  |
| H  | 4.559341  | -2.090115 | -0.157879 |
| Ag | -0.502328 | 2.815697  | 0.648684  |
| H  | -2.250213 | -1.507540 | -0.882675 |
| H  | -4.612495 | -1.993501 | -1.319231 |
| H  | -6.337658 | -0.245292 | -0.985609 |
| H  | -5.660740 | 2.010880  | -0.204305 |
| H  | -3.280365 | 2.499230  | 0.233102  |
| O  | 1.563437  | -2.864889 | -0.772297 |

#### 2.24. Cartesian coordinates of the molecule 5b

|   | x         | y         | z         |
|---|-----------|-----------|-----------|
| C | 2.823770  | 0.100132  | 0.494606  |
| C | 3.071521  | 0.050439  | -0.894704 |
| C | 4.383955  | 0.067599  | -1.362614 |
| C | 5.405612  | 0.133170  | -0.425262 |
| C | 5.137006  | 0.181403  | 0.950890  |
| C | 3.835139  | 0.165794  | 1.440739  |
| N | 1.880524  | -0.011475 | -1.612999 |
| C | 0.929520  | 0.001308  | -0.722759 |
| N | 1.428608  | 0.068205  | 0.599023  |
| C | 0.651342  | 0.084485  | 1.736149  |
| O | -0.698651 | 0.052295  | 1.489405  |
| C | -1.261615 | -0.018006 | 0.229251  |
| C | -0.482942 | -0.055769 | -0.871850 |
| C | -2.723576 | -0.064056 | 0.276880  |
| C | -3.384124 | -0.377581 | 1.471417  |
| C | -4.770653 | -0.440931 | 1.509472  |
| C | -5.517551 | -0.188807 | 0.364111  |
| C | -4.868402 | 0.133678  | -0.825305 |
| C | -3.484734 | 0.199330  | -0.870144 |
| O | 1.062427  | 0.127386  | 2.859397  |
| H | 4.584680  | 0.030388  | -2.424928 |
| H | 6.434849  | 0.147574  | -0.760827 |
| H | 5.961862  | 0.231746  | 1.649978  |
| H | 3.615201  | 0.202237  | 2.497363  |
| H | -0.900711 | -0.142413 | -1.860898 |
| H | -2.806187 | -0.572715 | 2.363274  |
| H | -5.268290 | -0.688423 | 2.438647  |
| H | -6.598683 | -0.236344 | 0.397265  |
| H | -5.443546 | 0.344082  | -1.718119 |
| H | -2.996349 | 0.475269  | -1.795177 |

#### 2.25. Cartesian coordinates of the molecule 6b

|   | x        | y         | z        |
|---|----------|-----------|----------|
| C | 3.050333 | -0.545297 | 0.000000 |
| C | 3.066852 | 0.874887  | 0.000000 |
| C | 4.288376 | 1.542784  | 0.000000 |
| C | 5.448188 | 0.778234  | 0.000000 |
| C | 5.406622 | -0.623542 | 0.000000 |
| C | 4.199776 | -1.316074 | 0.000000 |
| N | 1.767851 | 1.400804  | 0.000000 |
| C | 1.001392 | 0.353311  | 0.000000 |
| N | 1.693386 | -0.853113 | 0.000000 |
| C | 0.835269 | -1.940631 | 0.000000 |



|   |           |           |          |
|---|-----------|-----------|----------|
| O | -0.442756 | -1.402451 | 0.000000 |
| C | -0.399116 | 0.001020  | 0.000000 |
| C | -1.477460 | 0.795160  | 0.000000 |
| C | -2.888931 | 0.459064  | 0.000000 |
| C | -3.380931 | -0.858392 | 0.000000 |
| C | -4.747225 | -1.094849 | 0.000000 |
| C | -5.651334 | -0.035262 | 0.000000 |
| C | -5.178826 | 1.273683  | 0.000000 |
| C | -3.813979 | 1.516996  | 0.000000 |
| O | 1.077122  | -3.106944 | 0.000000 |
| H | 4.319143  | 2.624023  | 0.000000 |
| H | 6.410222  | 1.274807  | 0.000000 |
| H | 6.334411  | -1.180932 | 0.000000 |
| H | 4.157089  | -2.396274 | 0.000000 |
| H | -1.233096 | 1.851805  | 0.000000 |
| H | -2.692318 | -1.689458 | 0.000000 |
| H | -5.110533 | -2.114962 | 0.000000 |
| H | -6.716680 | -0.229345 | 0.000000 |
| H | -5.874107 | 2.103758  | 0.000000 |
| H | -3.448740 | 2.537191  | 0.000000 |

#### 2.26. Cartesian coordinates of isobutylene

|   | x         | y         | z         |
|---|-----------|-----------|-----------|
| C | 0.122978  | 0.176824  | -0.018765 |
| C | 0.885152  | 1.273422  | -0.133786 |
| C | 0.715720  | -1.201552 | 0.112027  |
| C | -1.381621 | 0.243514  | -0.010912 |
| H | 0.444060  | 2.267571  | -0.227493 |
| H | 1.975078  | 1.212669  | -0.138022 |
| H | 0.392222  | -1.680483 | 1.051174  |
| H | 1.813170  | -1.177772 | 0.097545  |
| H | 0.372778  | -1.856137 | -0.706437 |
| H | -1.745464 | 1.274427  | -0.110691 |
| H | -1.805607 | -0.354556 | -0.834525 |
| H | -1.788492 | -0.178465 | 0.922940  |

#### 2.27. Cartesian coordinates of TFA

|   | x         | y         | z         |
|---|-----------|-----------|-----------|
| C | -0.800793 | -0.026695 | 0.018073  |
| C | 0.591474  | 0.691616  | 0.075917  |
| O | 1.454308  | 0.198451  | 0.988300  |
| O | 0.840180  | 1.608467  | -0.658531 |
| F | -0.972238 | -0.619115 | -1.177811 |
| F | -0.901609 | -1.000643 | 0.985780  |
| F | -1.794384 | 0.854922  | 0.217189  |
| H | 1.035667  | -0.539001 | 1.479018  |

#### 2.28. Cartesian coordinates of anion TFA (Charge -1)

|   | x         | y         | z        |
|---|-----------|-----------|----------|
| C | -0.593034 | 0.038451  | 0.000000 |
| C | 1.004796  | -0.035012 | 0.000000 |

|   |           |           |           |
|---|-----------|-----------|-----------|
| O | 1.581054  | 1.074563  | 0.000000  |
| O | 1.420749  | -1.215737 | 0.000000  |
| F | -1.118262 | 1.308332  | 0.000000  |
| F | -1.147652 | -0.585298 | 1.100062  |
| F | -1.147652 | -0.585298 | -1.100062 |

---

### 3. References:

1. Ahlrichs, R.; Bär, M.; Häser, M.; Horn, H.; Kölmel, C. Electronic Structure Calculations on Workstation Computers: The Program System Turbomole. *Chem. Phys. Lett.* **1989**, *162*, 165–169.
2. Jiménez-Hoyos, C.A.; Janesko, B.G.; Scuseria, G.E. Evaluation of range-separated hybrid density functionals for the prediction of vibrational frequencies, infrared intensities, and Raman activities. *Phys. Chem. Chem. Phys.* **2008**, *10*, 6621–6629.
3. Weigend, F.; Häser, M. RI-MP2: First Derivatives and Global Consistency. *Theor. Chem. Acc.* **1997**, *97*, 331–340.
4. Weigend, F.; Häser, M.; Patzelt, H.; Ahlrichs, R. RI-MP2: Optimized Auxiliary Basis Sets and Demonstration of Efficiency. *Chem. Phys. Lett.* **1998**, *294*, 143–152.
5. Becke, A.D. Density-Functional Exchange-Energy Approximation with Correct Asymptotic Behavior. *Phys. Rev. A* **1988**, *38*, 3098–3100.
6. Lee, C.; Yang, W.; Parr, R.G. Development of the Colle-Salvetti Correlation-Energy Formula into a Functional of the Electron Density. *Phys. Rev. B* **1988**, *37*, 785–789.
7. Grimme, S. Semiempirical GGA-Type Density Functional Constructed with a Long-Range Dispersion Correction. *J. Comput. Chem.* **2006**, *27*, 1787–1799.
8. Grimme, S.; Antony, J., Ehrlich, S., Krieg, H. A Consistent and Accurate Ab Initio Parametrization of Density Functional Dispersion Correction (DFT-D) for the 94 Elements H-Pu. *J. Chem. Phys.* **2010**, *132*, 154104.
